# Supplementary material for: Towards the complete synthetic O-antigen of Vibrio cholerae O1, serotype inaba: improved synthesis of the conjugation-ready upstream terminal hexasaccharide determinant
Source: Royal Society of Chemistry journal article supplement (doi:10.1039/c9ra08232h), 2019-01-01
Supplement: c9ra08232h1.pdf [file c9ra08232h1.pdf]

# Electronic Supplementary Information (ESI)

## Towards the Complete Synthetic *O*-Antigen of *Vibrio cholerae* O1, Serotype

### Inaba: Improved Synthesis of the Conjugation-ready Upstream Terminal

#### Hexasaccharide Determinant

Mana Mohan Mukherjee,<sup>1\*</sup> Peng Xu,<sup>1</sup> Stevens Edwin, D.,<sup>2</sup> and Pavol Kováč <sup>1\*</sup>

<sup>1</sup>LBC, NIDDK, National Institutes of Health, Bethesda, MD 20892-0815

<sup>2</sup>Department of Chemistry, Western Kentucky University, Bowling Green, KY, 42101

\*E-mail Address: [mana.mukherjee@nih.gov](mailto:mana.mukherjee@nih.gov) and [kpn@helix.nih.gov](mailto:kpn@helix.nih.gov)

#### Table of Content

|                                                                    |      |
|--------------------------------------------------------------------|------|
| Fig. S1: <sup>1</sup> H NMR of <b>11a</b>                          | S-4  |
| Fig. S2: <sup>13</sup> C NMR of <b>11a</b>                         | S-4  |
| Fig. S3: <sup>1</sup> H NMR of <b>11</b>                           | S-5  |
| Fig. S4: <sup>13</sup> C NMR of <b>11b</b>                         | S-5  |
| Fig. S5: <sup>1</sup> H NMR of <b>7a</b>                           | S-6  |
| Fig. S6: <sup>13</sup> C NMR of <b>7a</b>                          | S-6  |
| Fig. S7: <sup>1</sup> H NMR of <b>7b</b>                           | S-7  |
| Fig. S8: <sup>13</sup> C NMR of <b>7b</b>                          | S-7  |
| Fig. S9: COSY NMR of <b>7b</b>                                     | S-8  |
| Fig. S10: HSQC NMR of <b>7b</b>                                    | S-8  |
| Fig. S11: <sup>1</sup> H NMR of <b>13a</b>                         | S-9  |
| Fig. S12: <sup>13</sup> C NMR of <b>13a</b>                        | S-9  |
| Fig. S13: <sup>1</sup> H NMR of <b>8</b>                           | S-10 |
| Fig. S14: <sup>13</sup> C NMR of <b>8</b>                          | S-10 |
| Fig. S15: <sup>1</sup> H NMR of <b>14</b>                          | S-11 |
| Fig. S16: <sup>13</sup> C NMR of <b>14</b>                         | S-11 |
| Fig. S17: COSY NMR of <b>14</b>                                    | S-12 |
| Fig. S18: COSY expansion NMR (1.5 -5.5 ppm) of <b>14</b>           | S-12 |
| Fig. S19: HSQC NMR of <b>14</b>                                    | S-13 |
| Fig. S20: <sup>1</sup> H- <sup>13</sup> C coupled NMR of <b>14</b> | S-13 |
| Fig. S21: <sup>1</sup> H NMR of <b>6</b>                           | S-14 |

|                                                                   |      |
|-------------------------------------------------------------------|------|
| Fig. S22: $^{13}\text{C}$ NMR of <b>6</b>                         | S-14 |
| Fig. S23: $^1\text{H}$ NMR of <b>15</b>                           | S-15 |
| Fig. S24: $^{13}\text{C}$ NMR of <b>15</b>                        | S-15 |
| Fig. S25: COSY NMR of <b>15</b>                                   | S-16 |
| Fig. S26: COSY expansion NMR (1.5 -5.5 ppm) of <b>15</b>          | S-16 |
| Fig. S27: HSQC NMR of <b>15</b>                                   | S-17 |
| Fig. S28: HMBC NMR of <b>15</b>                                   | S-17 |
| Fig. S29: $^1\text{H}$ - $^{13}\text{C}$ coupled NMR of <b>15</b> | S-18 |
| Fig. S30: $^1\text{H}$ NMR of <b>4</b>                            | S-18 |
| Fig. S31: $^{13}\text{C}$ NMR of <b>4</b>                         | S-19 |
| Fig. S32: COSY NMR of <b>4</b>                                    | S-19 |
| Fig. S33: COSY expansion NMR (1.5 -5.0 ppm) of <b>4</b>           | S-20 |
| Fig. S34: HSQC NMR of <b>4</b>                                    | S-20 |
| Fig. S35: HMBC NMR of <b>4</b>                                    | S-21 |
| Fig. S36: $^1\text{H}$ NMR of <b>16</b>                           | S-21 |
| Fig. S37: $^{13}\text{C}$ NMR of <b>16</b>                        | S-22 |
| Fig. S38: COSY NMR of <b>16</b>                                   | S-22 |
| Fig. S39: COSY expansion NMR (1.5 -5.0 ppm) of <b>16</b>          | S-23 |
| Fig. S40: HSQC NMR of <b>16</b>                                   | S-23 |
| Fig. S41: $^1\text{H}$ NMR of <b>5</b>                            | S-24 |
| Fig. S42: $^{13}\text{C}$ NMR of <b>5</b>                         | S-24 |
| Fig. S43: COSY NMR of <b>5</b>                                    | S-25 |
| Fig. S44: HSQC NMR of <b>5</b>                                    | S-25 |
| Fig. S45: $^1\text{H}$ NMR of <b>3a</b>                           | S-26 |
| Fig. S46: $^{13}\text{C}$ NMR of <b>3a</b>                        | S-26 |
| Fig. S47: COSY NMR of <b>3a</b>                                   | S-27 |
| Fig. S48: HSQC NMR of <b>3a</b>                                   | S-27 |
| Fig. S49: HMBC NMR of <b>3a</b>                                   | S-28 |
| Fig. S50: $^1\text{H}$ - $^{13}\text{C}$ coupled NMR of <b>3a</b> | S-28 |
| Fig. S51: $^1\text{H}$ NMR of <b>3b</b>                           | S-29 |
| Fig. S52: $^{13}\text{C}$ NMR of <b>3b</b>                        | S-29 |
| Fig. S53: COSY NMR of <b>3b</b>                                   | S-30 |
| Fig. S54: HSQC NMR of <b>3b</b>                                   | S-30 |
| Fig. S55: HMBC NMR of <b>3b</b>                                   | S-31 |
| Fig. S56: $^1\text{H}$ - $^{13}\text{C}$ coupled NMR of <b>3b</b> | S-31 |
| Fig. S57: $^1\text{H}$ NMR of <b>17</b>                           | S-32 |
| Fig. S58: $^{13}\text{C}$ NMR of <b>17</b>                        | S-32 |

|                                                              |      |
|--------------------------------------------------------------|------|
| Fig. S59: COSY NMR of <b>17</b>                              | S-33 |
| Fig. S60: HSQC NMR of <b>17</b>                              | S-33 |
| Fig. S61: HMBC NMR of <b>17</b>                              | S-34 |
| Fig. S62: <sup>1</sup> H NMR of <b>18</b>                    | S-34 |
| Fig. S63: <sup>13</sup> C NMR of <b>18</b>                   | S-35 |
| Fig. S64: COSY NMR of <b>18</b>                              | S-35 |
| Fig. S65: HSQC NMR of <b>18</b>                              | S-36 |
| Fig. S66: HMBC NMR of <b>18</b>                              | S-36 |
| Fig. S67: <sup>1</sup> H NMR of <b>19</b>                    | S-37 |
| Fig. S68: <sup>13</sup> C NMR of <b>19</b>                   | S-37 |
| Fig. S69: COSY NMR of <b>19</b>                              | S-38 |
| Fig. S70: HSQC NMR of <b>19</b>                              | S-38 |
| Fig. S71: <sup>1</sup> H NMR of <b>20</b>                    | S-39 |
| Fig. S72: <sup>13</sup> C NMR of <b>20</b>                   | S-39 |
| Fig. S73: COSY NMR of <b>20</b>                              | S-40 |
| Fig. S74: HSQC NMR of <b>20</b>                              | S-40 |
| Fig. S75: <sup>1</sup> H NMR of <b>2a</b>                    | S-41 |
| Fig. S76: <sup>13</sup> C NMR of <b>2a</b>                   | S-41 |
| Fig. S77: COSY NMR of <b>2a</b>                              | S-42 |
| Fig. S78: HSQC NMR of <b>2a</b>                              | S-42 |
| Fig. S79: <sup>1</sup> H NMR of <b>2b</b>                    | S-43 |
| Fig. S80: <sup>13</sup> C NMR of <b>2b</b>                   | S-43 |
| Fig. S81: COSY NMR of <b>2b</b>                              | S-44 |
| Fig. S82: HSQC NMR of <b>2b</b>                              | S-44 |
| Fig. S83: <sup>1</sup> H NMR of <b>1</b>                     | S-45 |
| Fig. S84: <sup>13</sup> C NMR of <b>1</b>                    | S-45 |
| Fig. S85: COSY NMR of <b>1</b>                               | S-46 |
| Fig. S86: HSQC NMR of <b>1</b>                               | S-46 |
| Table for Crystal data and structure refinement for <b>4</b> | S-47 |

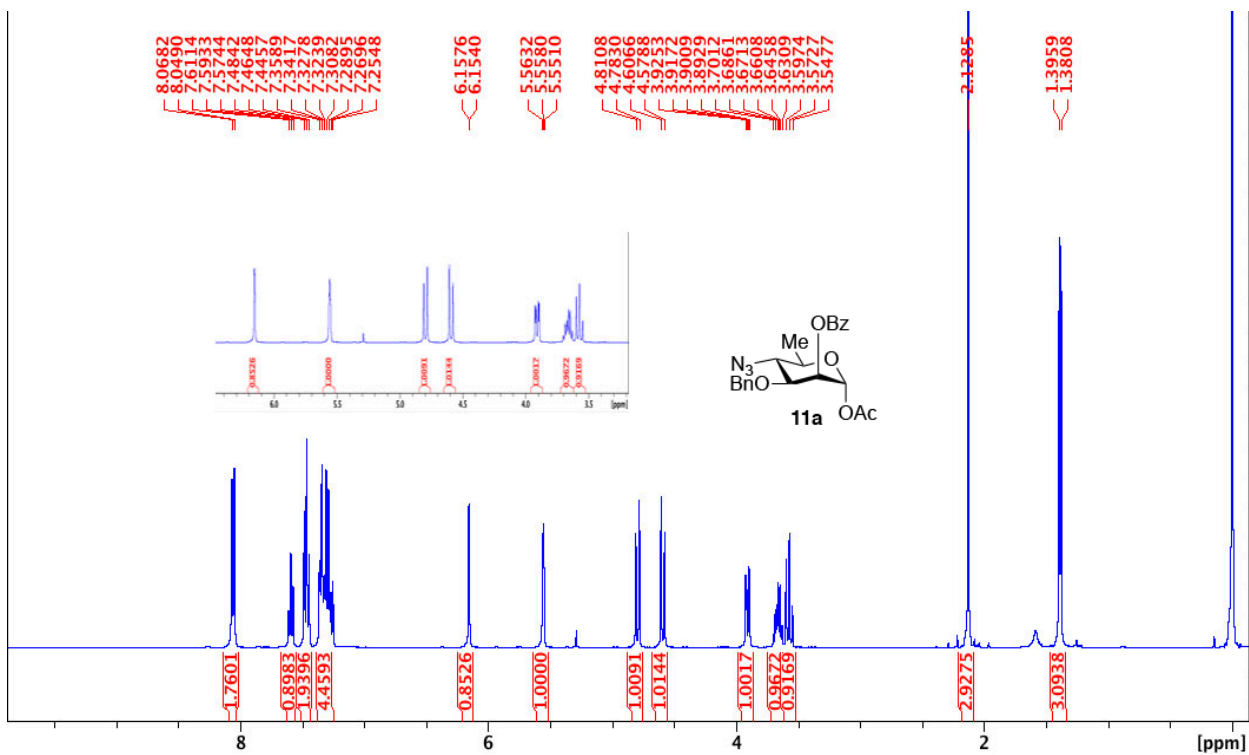

Fig. S1: <sup>1</sup>H NMR spectra of compound **11a** (CDCl<sub>3</sub>, 400 MHz).

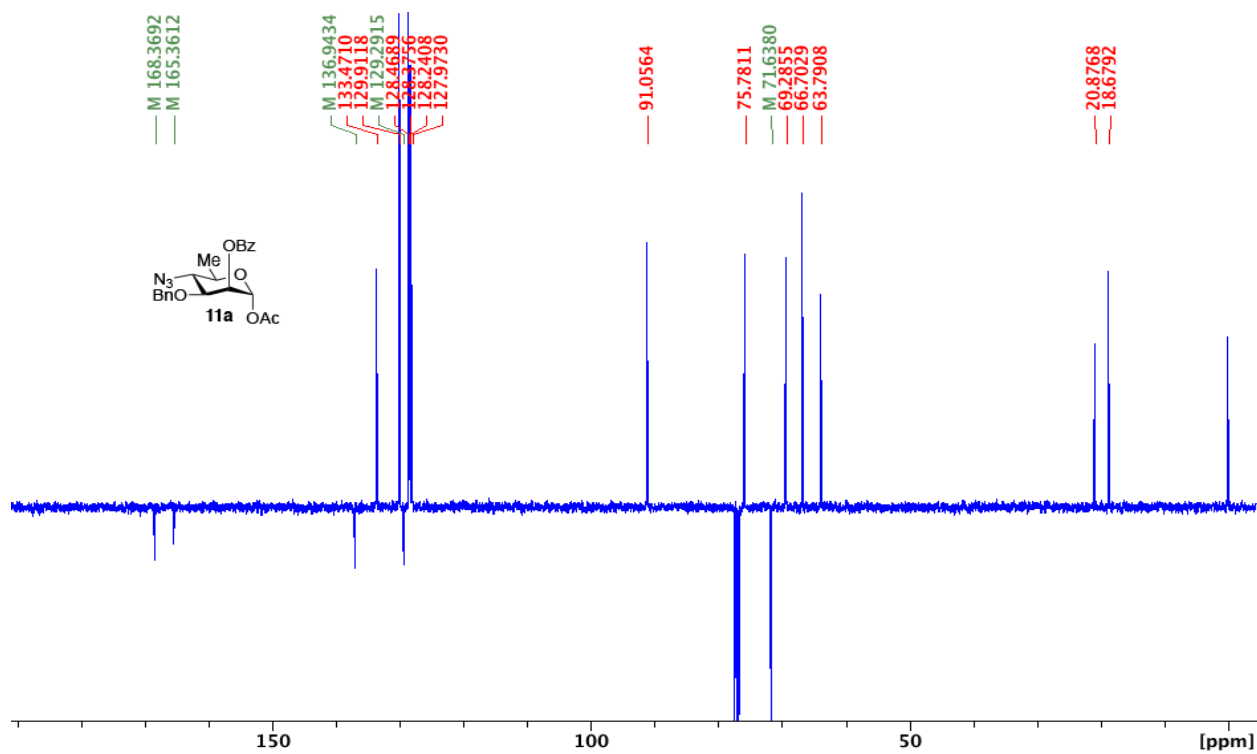

Fig. S2: <sup>13</sup>C {<sup>1</sup>H} NMR spectra of compound **11a** (CDCl<sub>3</sub>, 100 MHz).



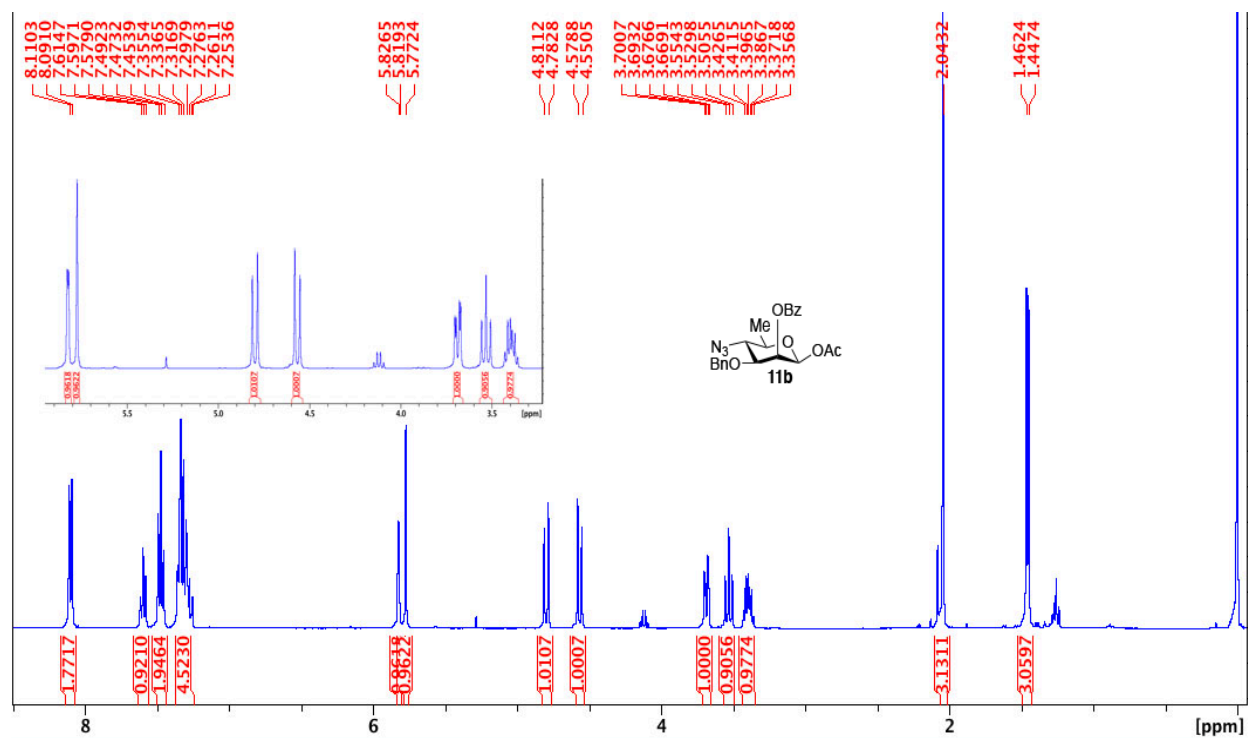

Fig. S3:  $^1\text{H}$  NMR spectra of compound **11b** ( $\text{CDCl}_3$ , 400 MHz).

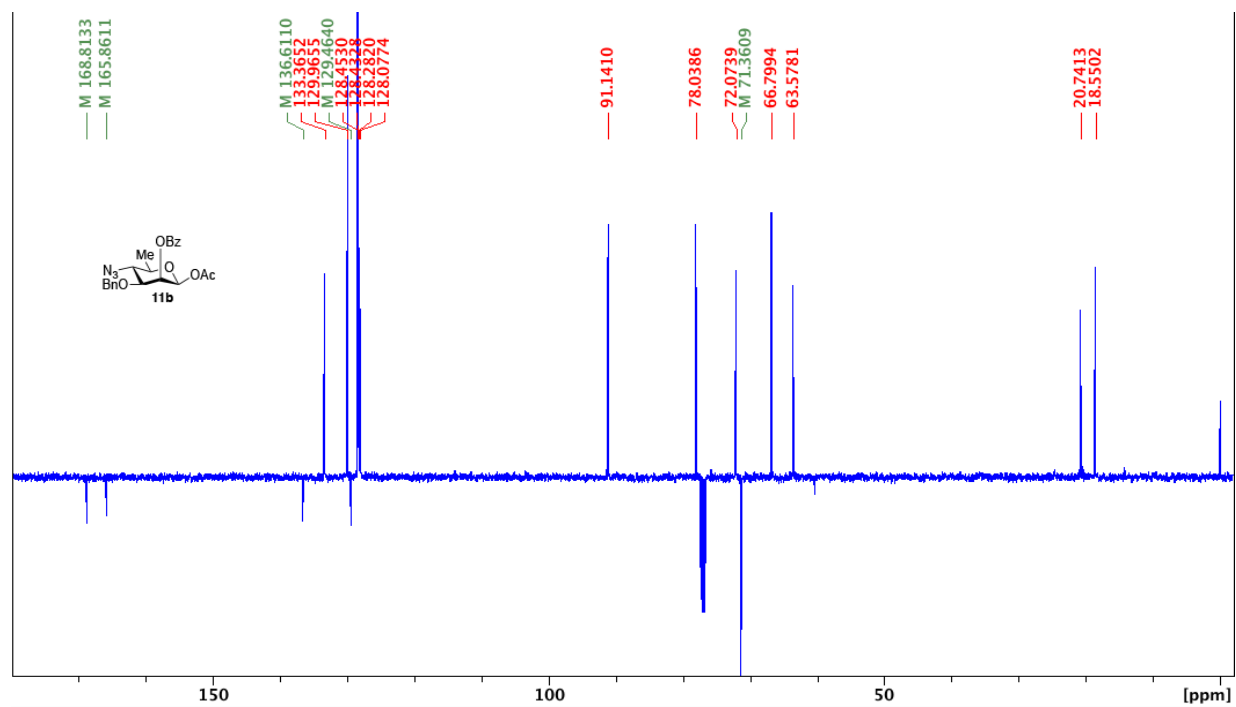

Fig. S4:  $^{13}\text{C}\{^1\text{H}\}$  NMR spectra of compound **11b** ( $\text{CDCl}_3$ , 100 MHz).

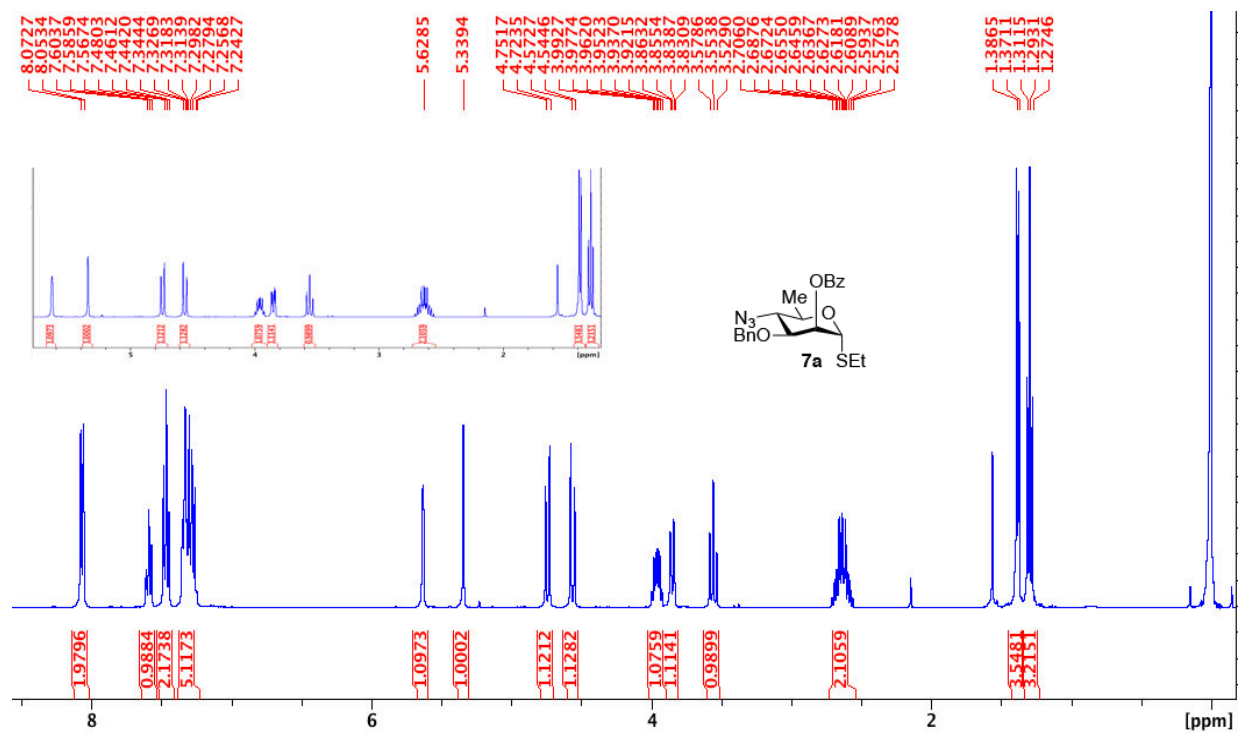

Fig. S5:  $^1\text{H}$  NMR spectra of compound **7a** ( $\text{CDCl}_3$ , 400 MHz).

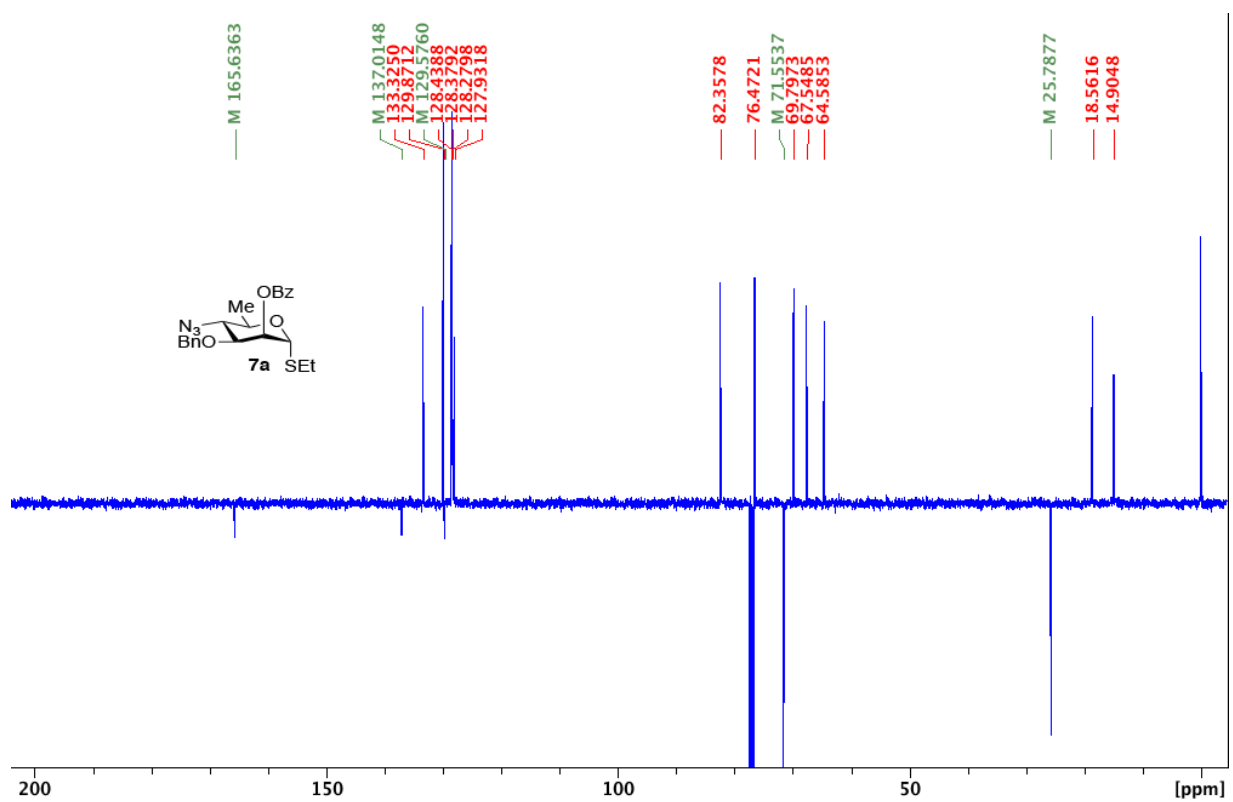

Fig. S6:  $^{13}\text{C}\{^1\text{H}\}$  NMR spectra of compound **7a** ( $\text{CDCl}_3$ , 100 MHz).

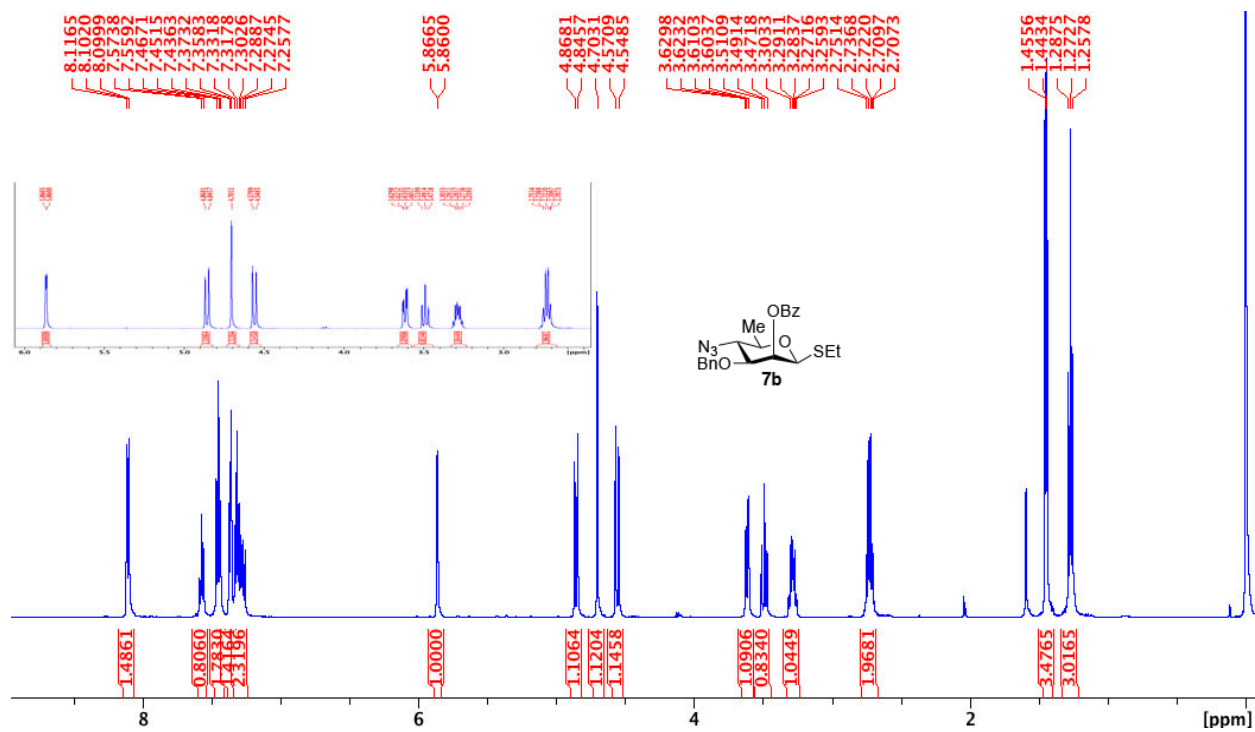

Fig. S7: <sup>1</sup>H NMR spectra of compound **7b** (CDCl<sub>3</sub>, 500 MHz).

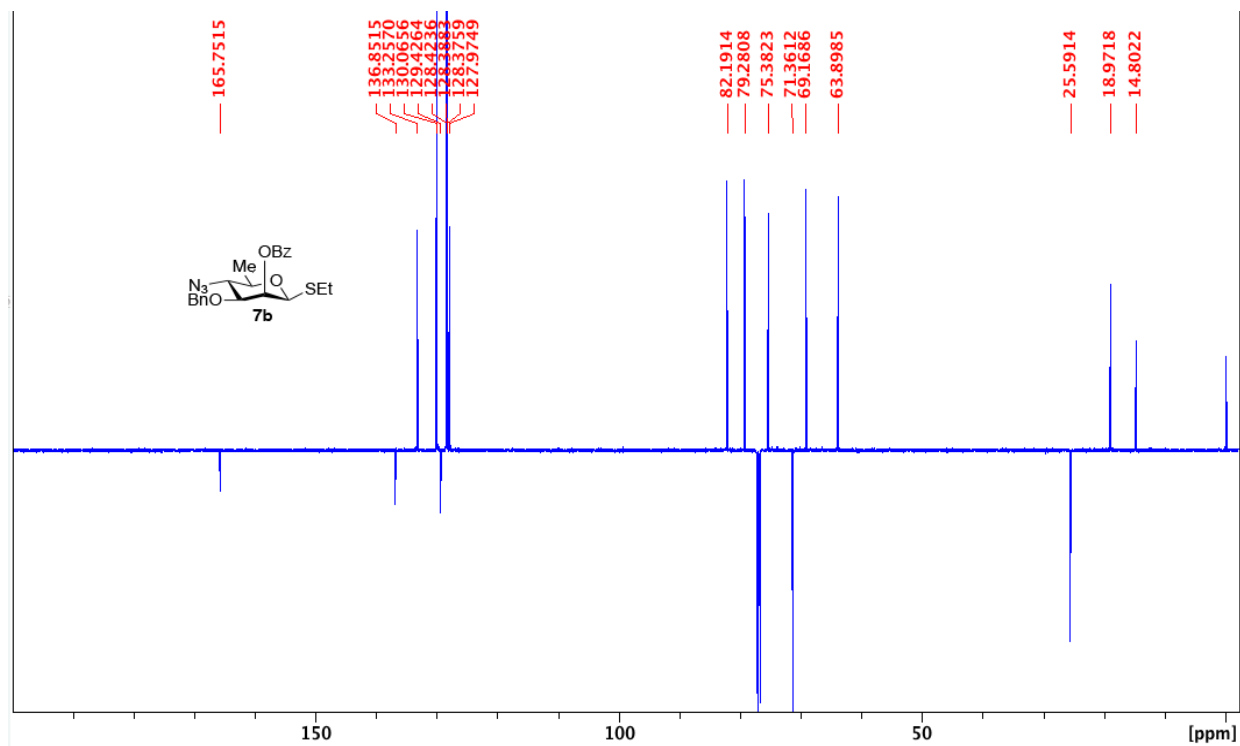

Fig. S8: <sup>13</sup>C{<sup>1</sup>H} NMR spectra of compound **7b** (CDCl<sub>3</sub>, 125 MHz).

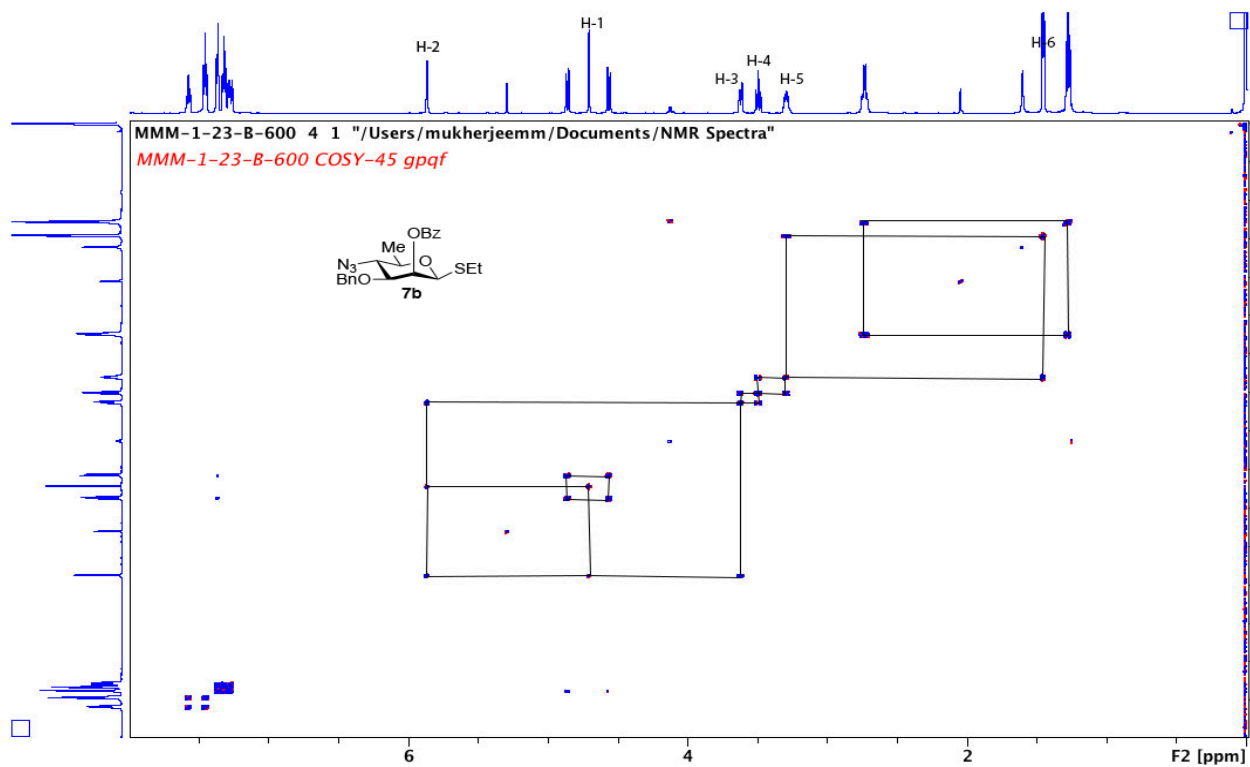

Fig. S9: COSY NMR spectra of compound **7b** (CDCl<sub>3</sub>, 500 MHz).

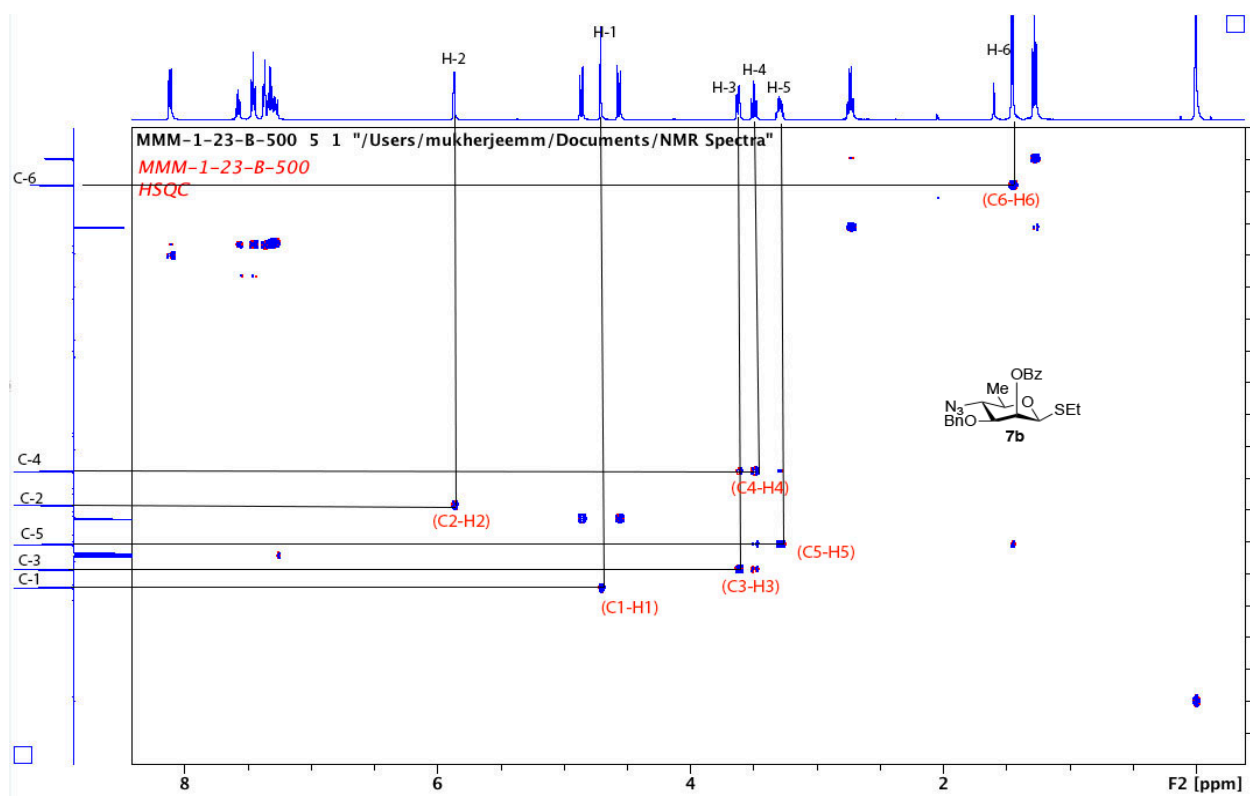

Fig. S10: HSQC NMR spectra of compound **7b** (CDCl<sub>3</sub>).

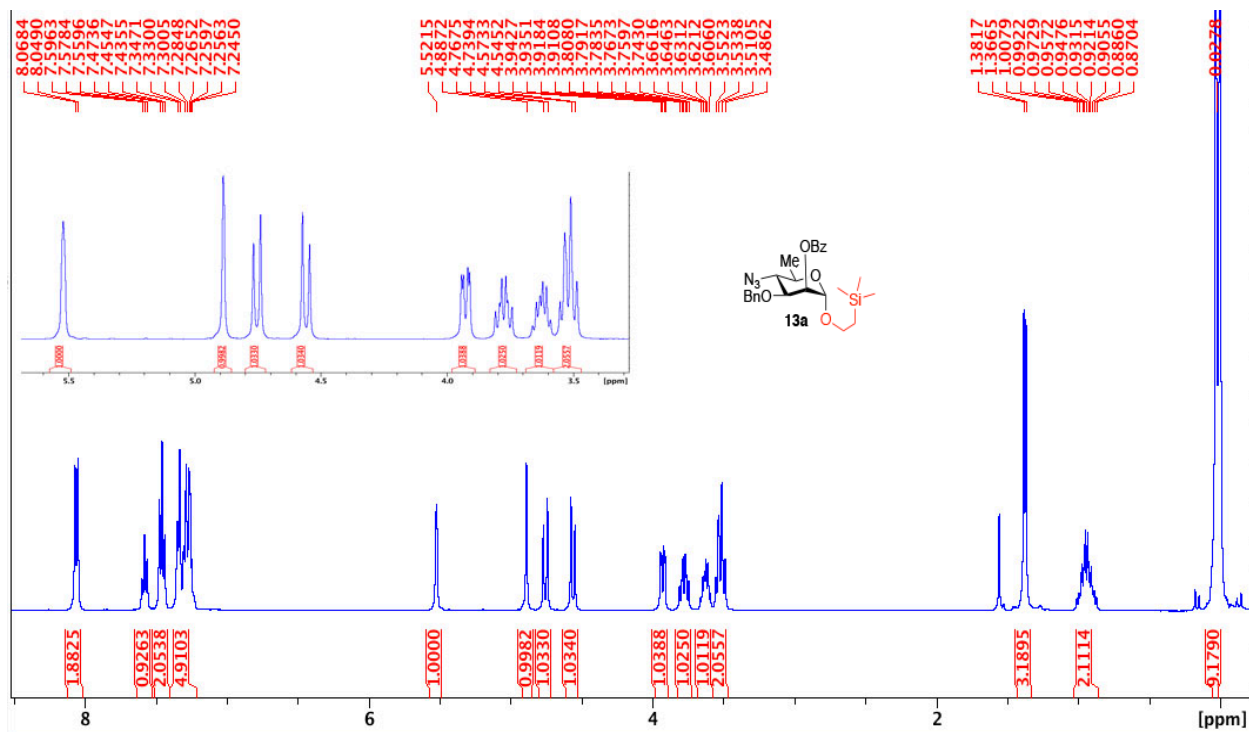

Fig. S11:  $^1\text{H}$  NMR spectra of compound **13a** ( $\text{CDCl}_3$ , 400 MHz).

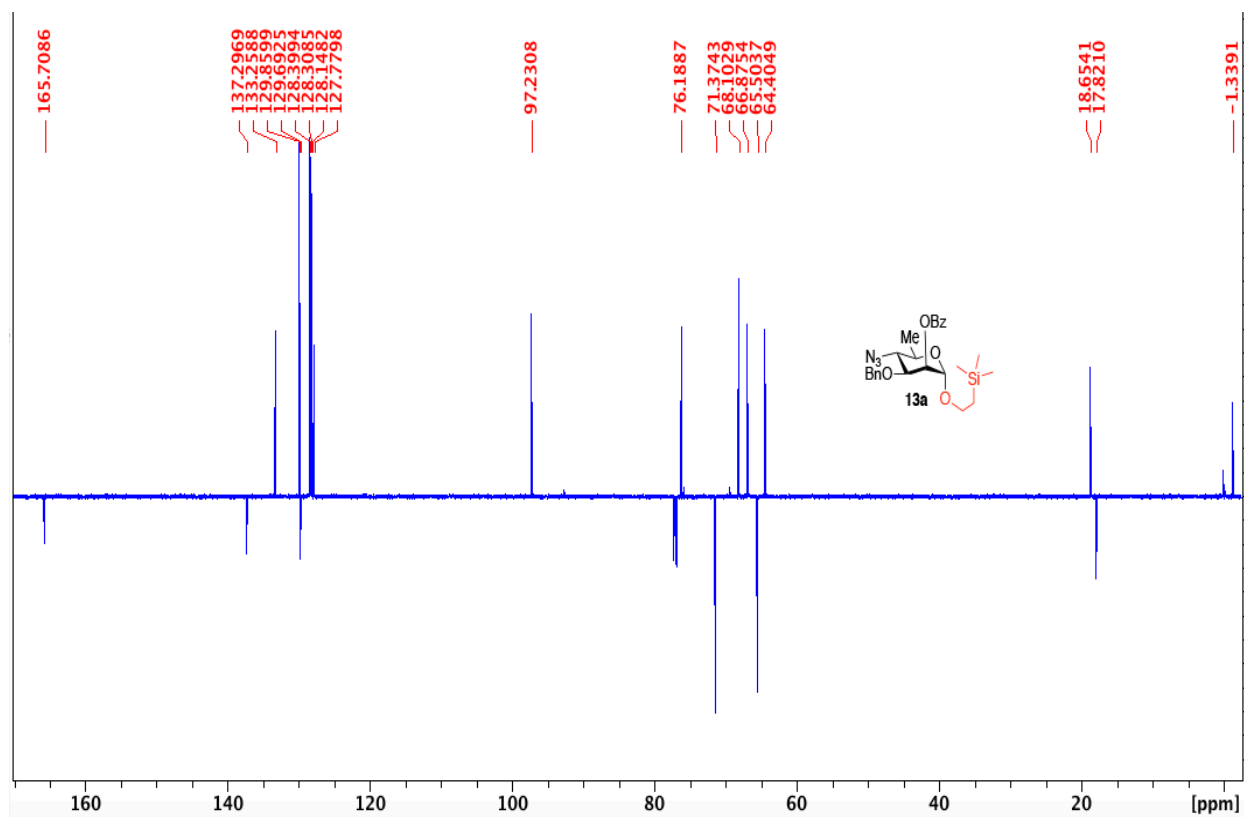

Fig. S12:  $^{13}\text{C}\{^1\text{H}\}$  NMR spectra of compound **13a** ( $\text{CDCl}_3$ , 100 MHz).

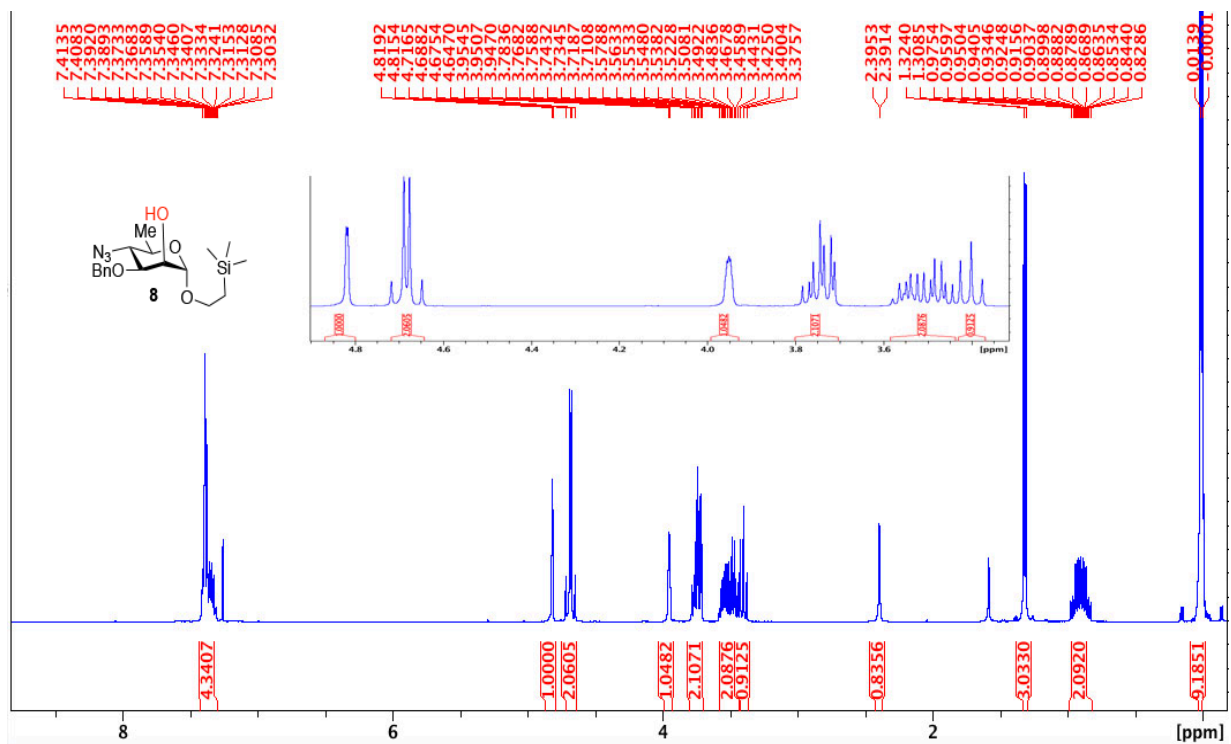

Fig. S13: <sup>1</sup>H NMR spectra of compound **8** (CDCl<sub>3</sub>, 400 MHz).

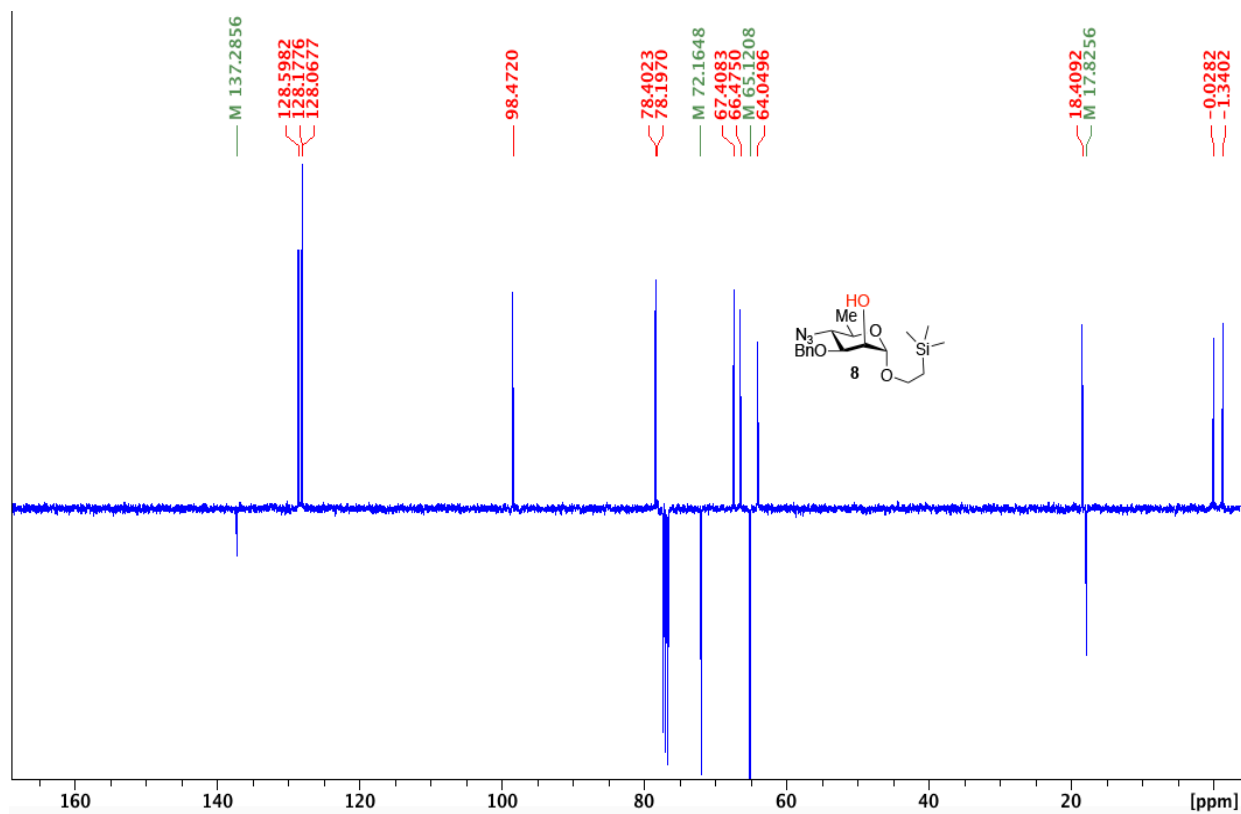

Fig. S14: <sup>13</sup>C{<sup>1</sup>H} NMR spectra of compound **8** (CDCl<sub>3</sub>, 100 MHz).

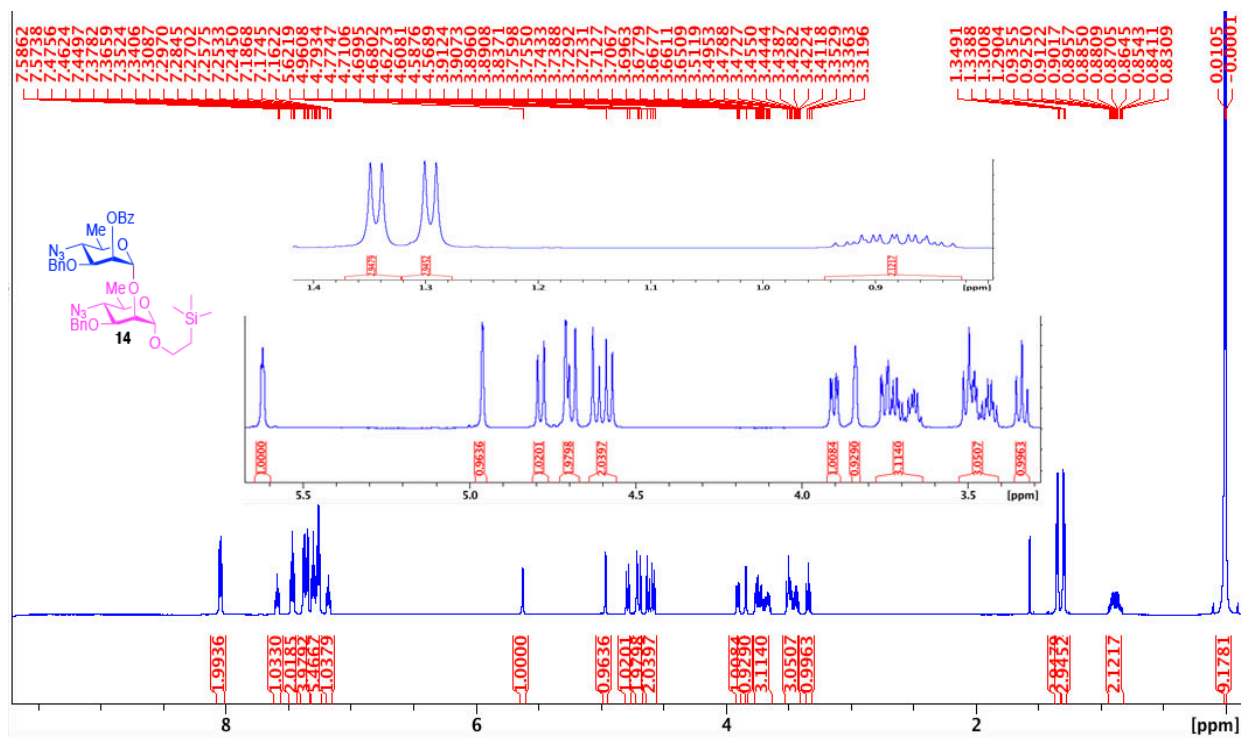

Fig. S15:  $^1\text{H}$  NMR spectra of compound **14** ( $\text{CDCl}_3$ , 600 MHz).

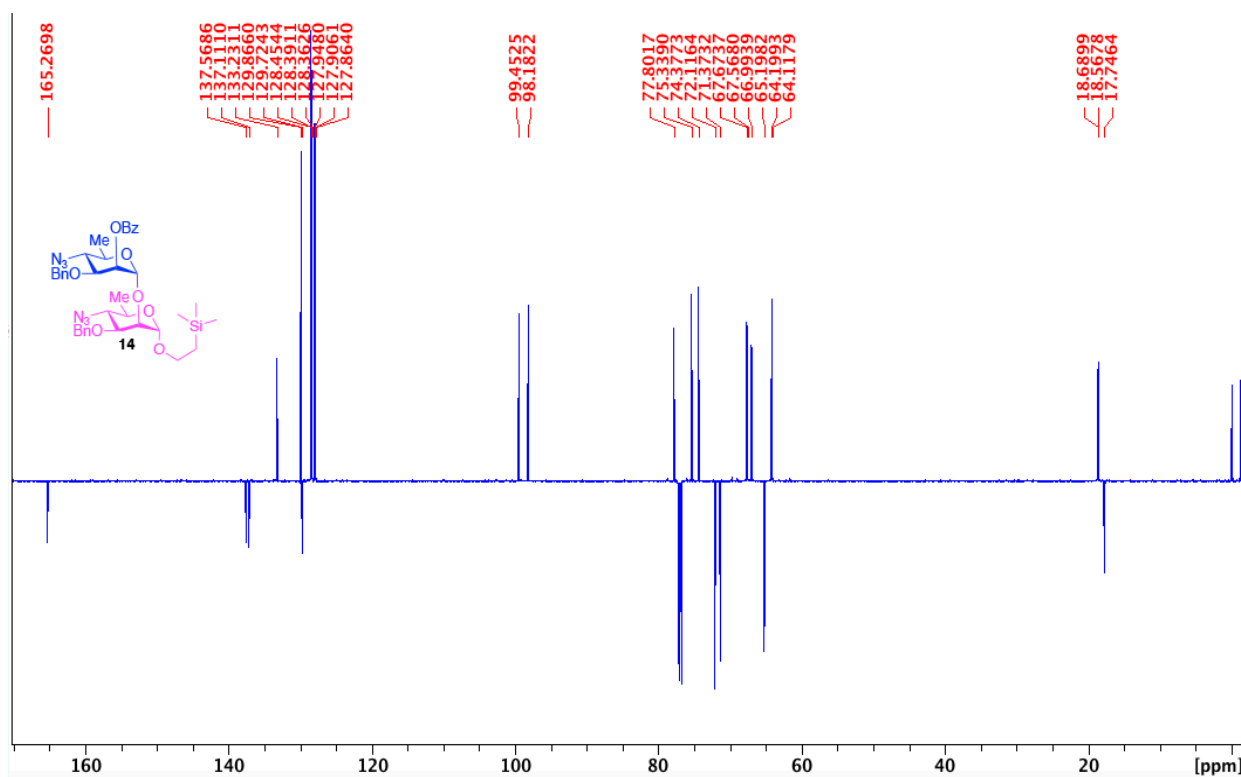

Fig. S16:  $^{13}\text{C}\{^1\text{H}\}$  NMR spectra of compound **14** ( $\text{CDCl}_3$ , 150 MHz).

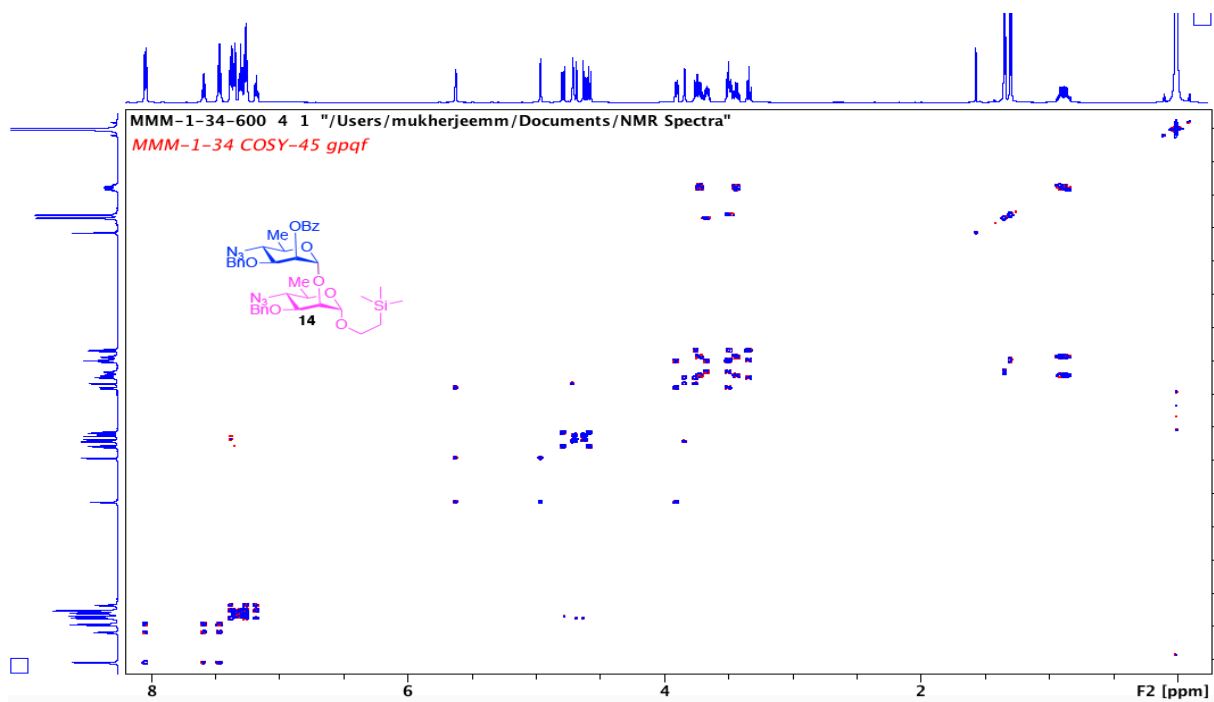

Fig. S17: COSY NMR spectra of compound **14** (CDCl<sub>3</sub>, 600 MHz).

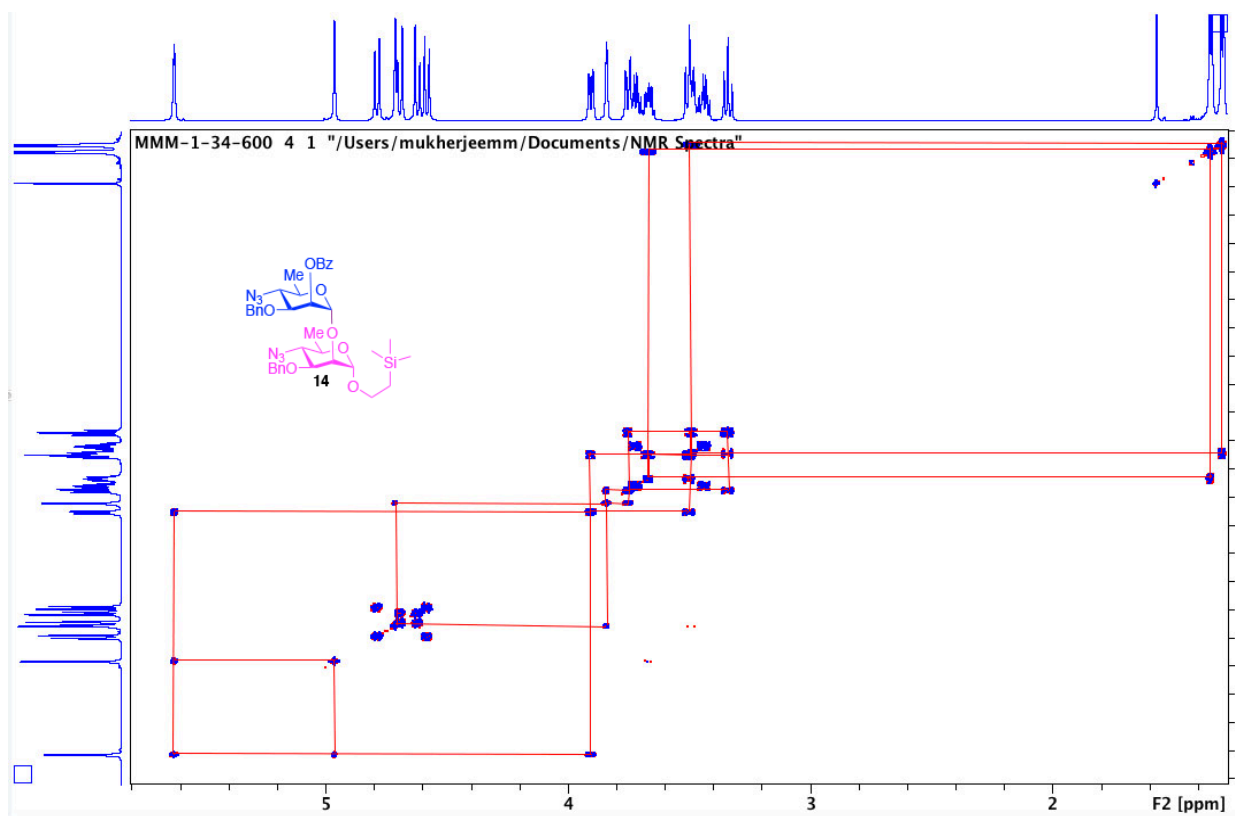

Fig. S18: COSY expansion (1.5 ppm to 5.5 ppm) NMR spectra of compound **14** (CDCl<sub>3</sub>, 600 MHz).



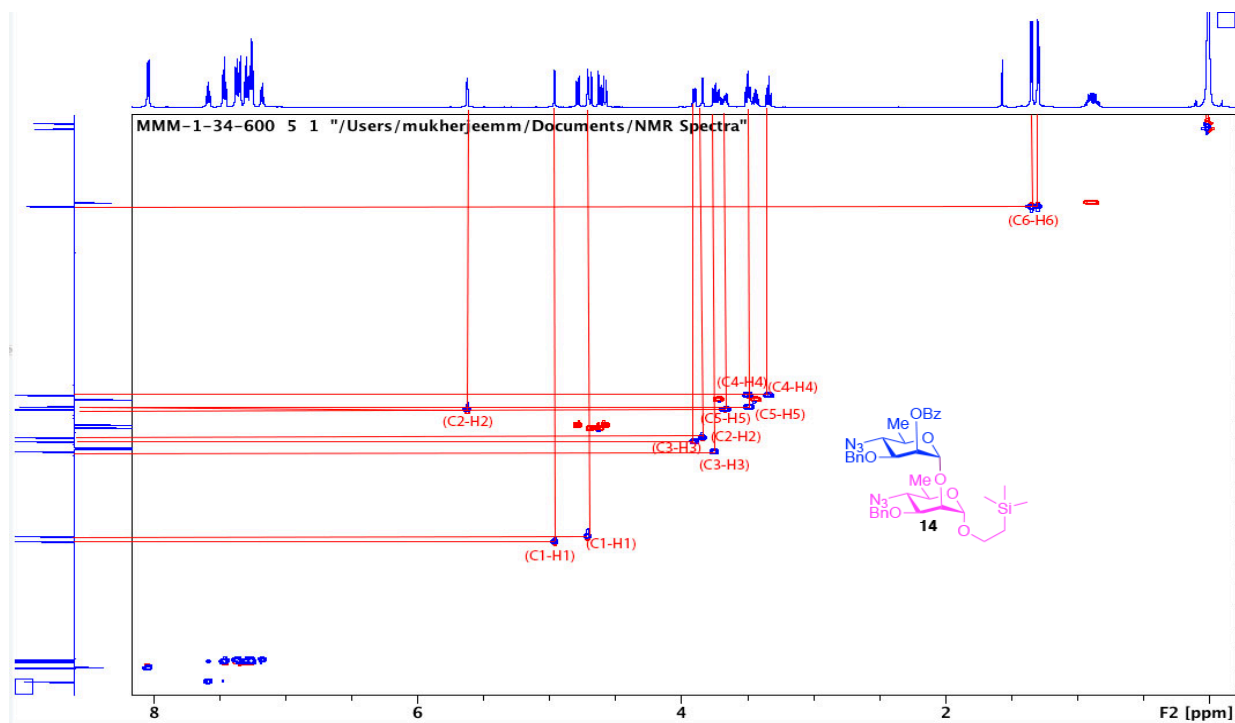

Fig. S19: HSQC NMR spectra of compound **14** ( $\text{CDCl}_3$ ).

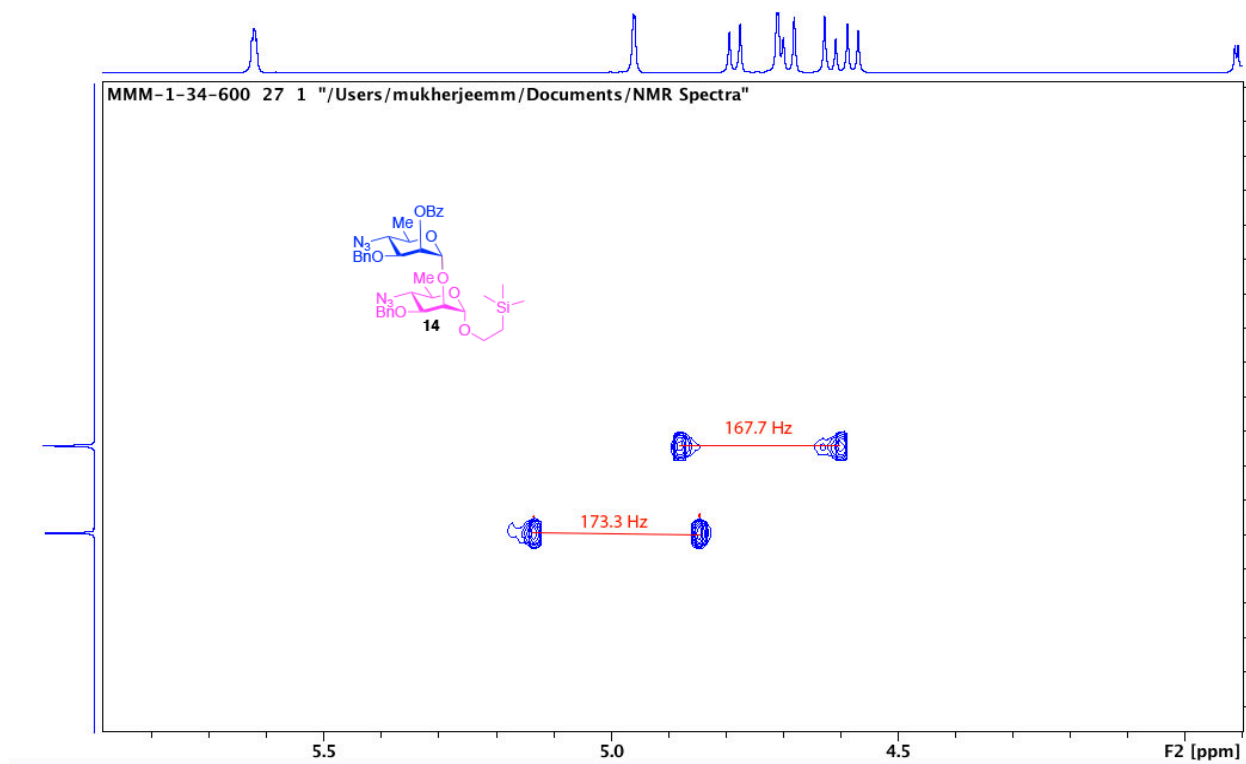

Fig. S20:  $^1\text{H}$ - $^{13}\text{C}$  coupled NMR spectra of compound **14** ( $\text{CDCl}_3$ ).

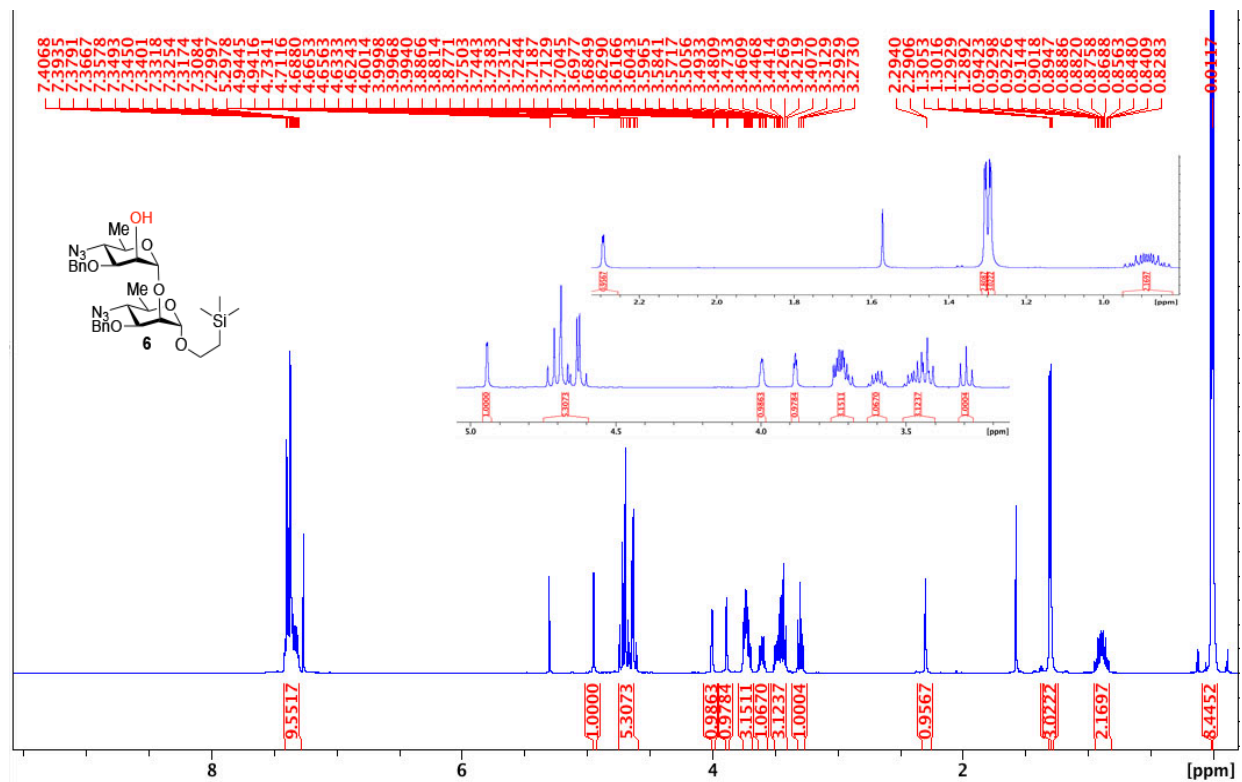

Fig. S21:  $^1\text{H NMR}$  spectra of compound **6** ( $\text{CDCl}_3$ , 500 MHz).

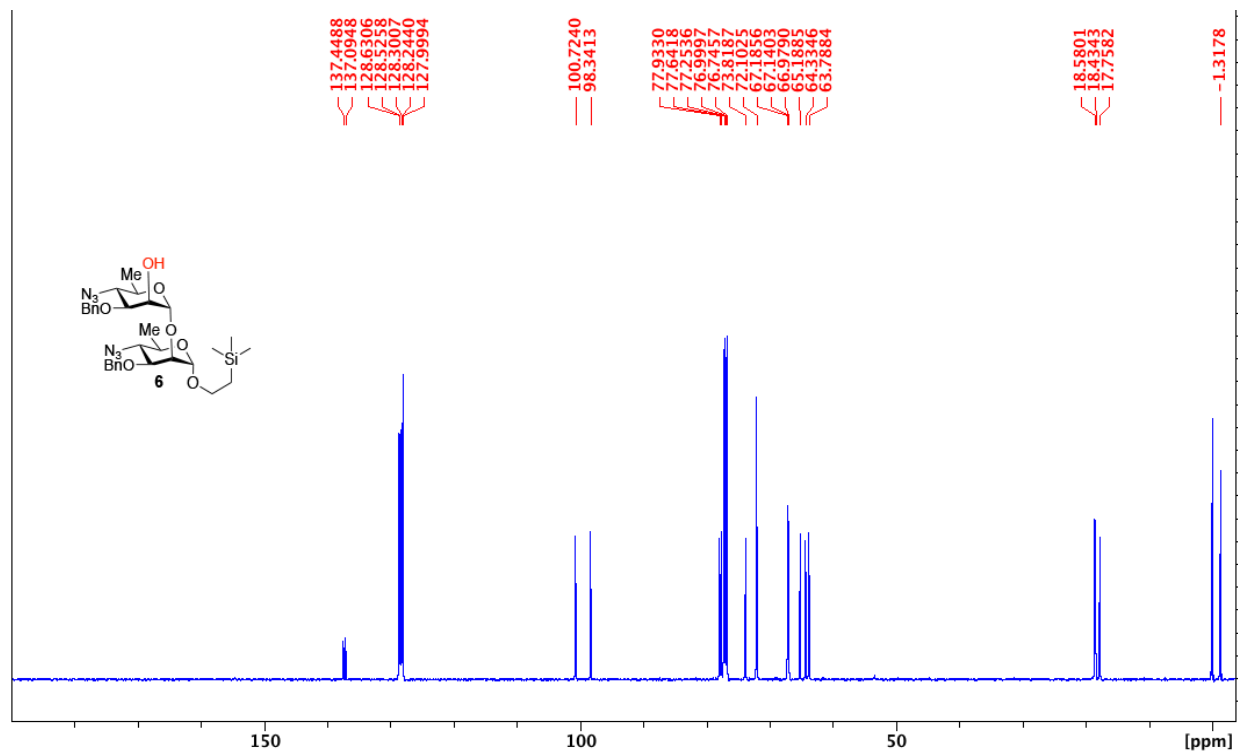

Fig. S22:  $^{13}\text{C}\{^1\text{H}\}$  NMR spectra of compound **6** ( $\text{CDCl}_3$ , 125 MHz).

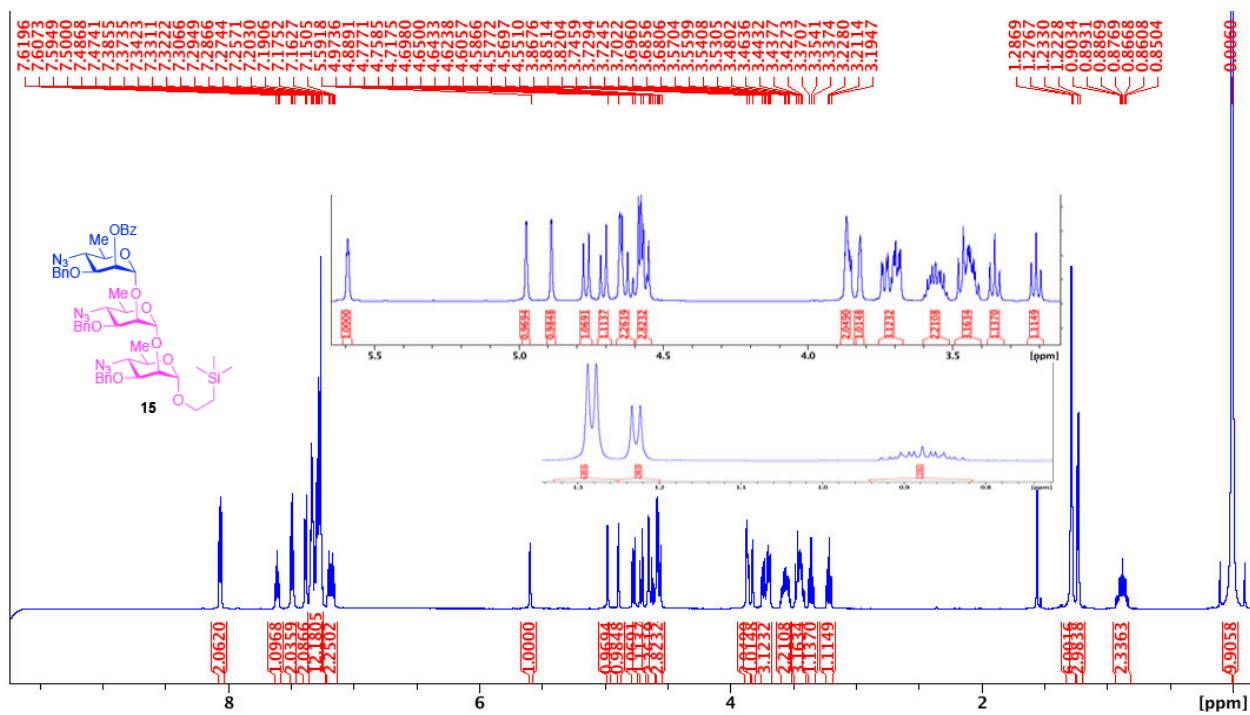

Fig. S23: <sup>1</sup>H NMR spectra of compound **15** (CDCl<sub>3</sub>, 600 MHz).

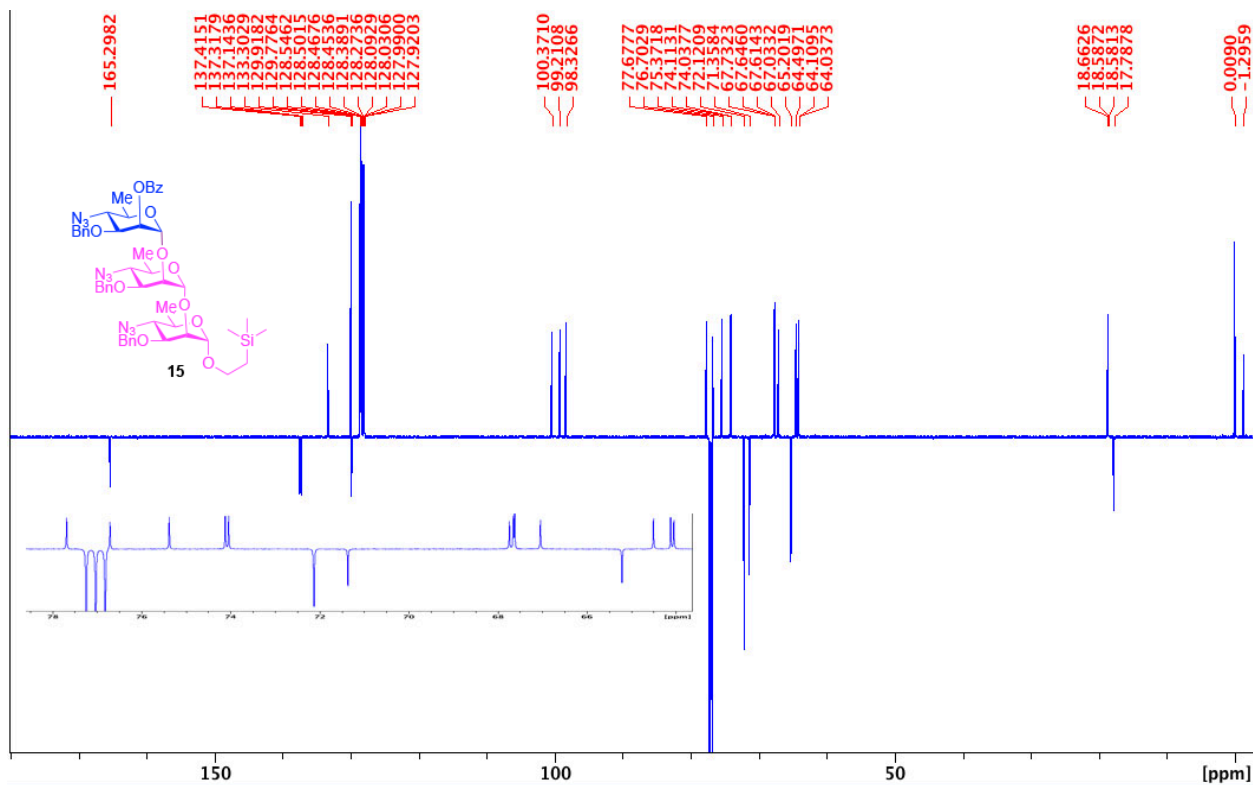

Fig. S24: <sup>13</sup>C{<sup>1</sup>H} NMR spectra of compound **15** (CDCl<sub>3</sub>, 150 MHz).

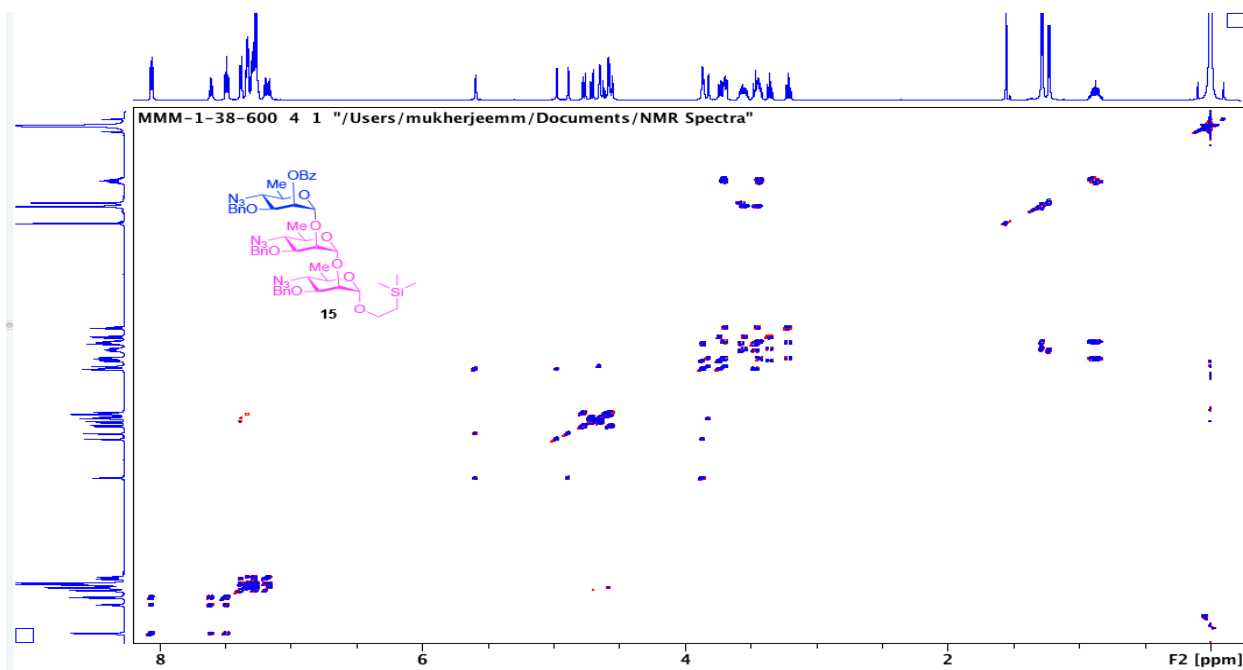

Fig. S25: COSY NMR spectra of compound **15** (CDCl<sub>3</sub>, 600 MHz).

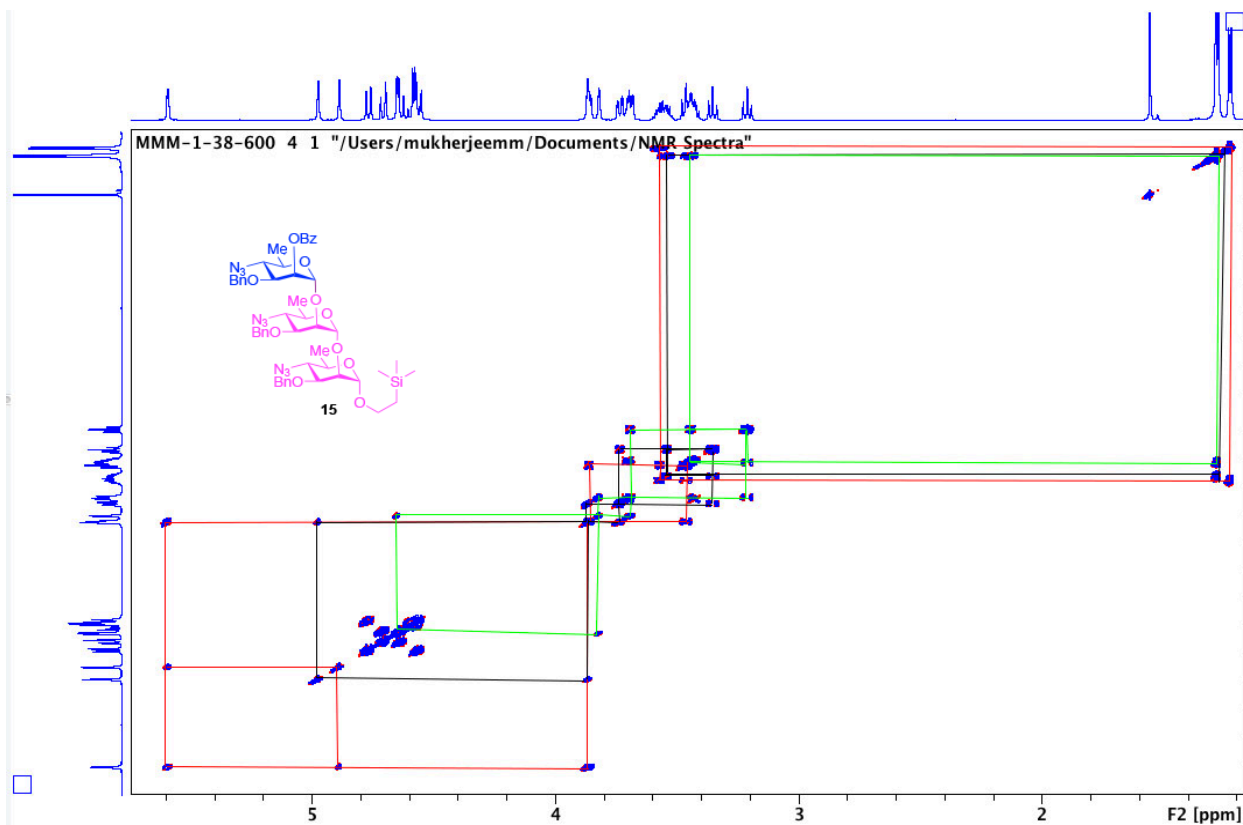

Fig. S26: COSY expansion (1.5 ppm to 5.5 ppm) NMR spectra of compound **15** (CDCl<sub>3</sub>, 600 MHz).

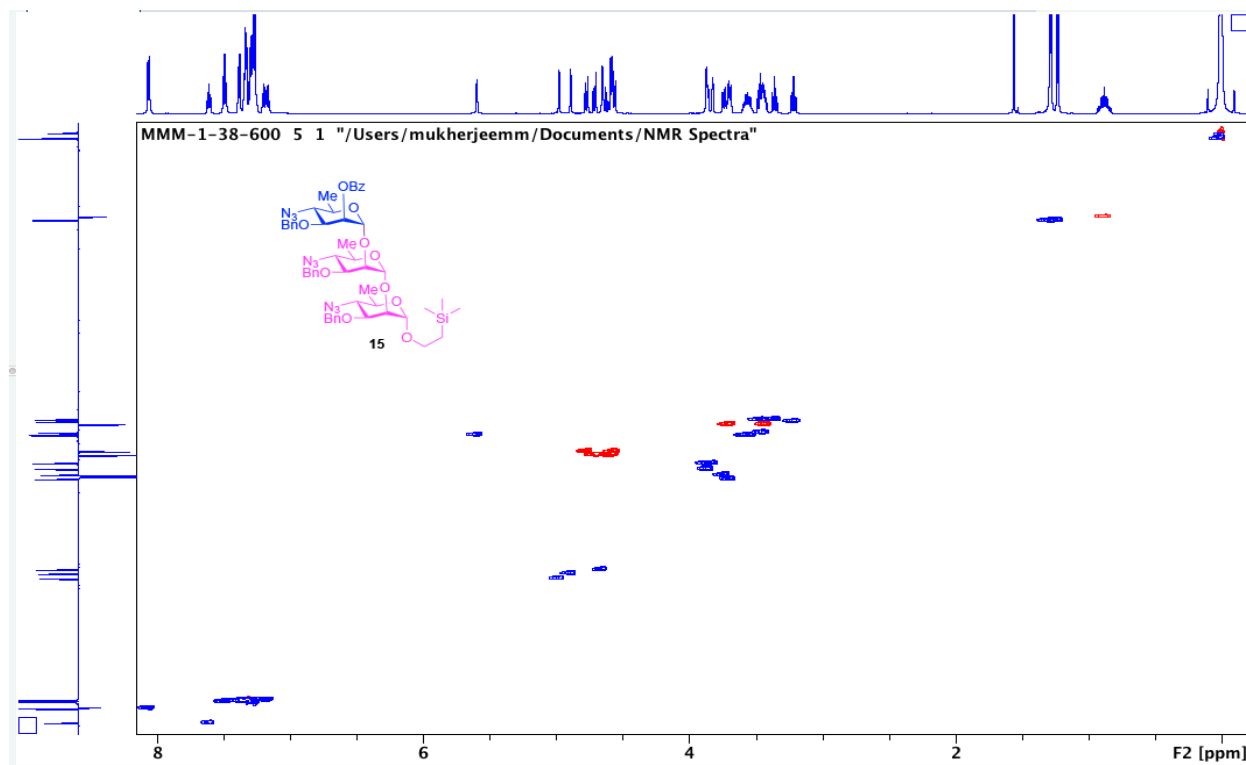

Fig. S27: HSQC NMR spectra of compound **15** (CDCl<sub>3</sub>).

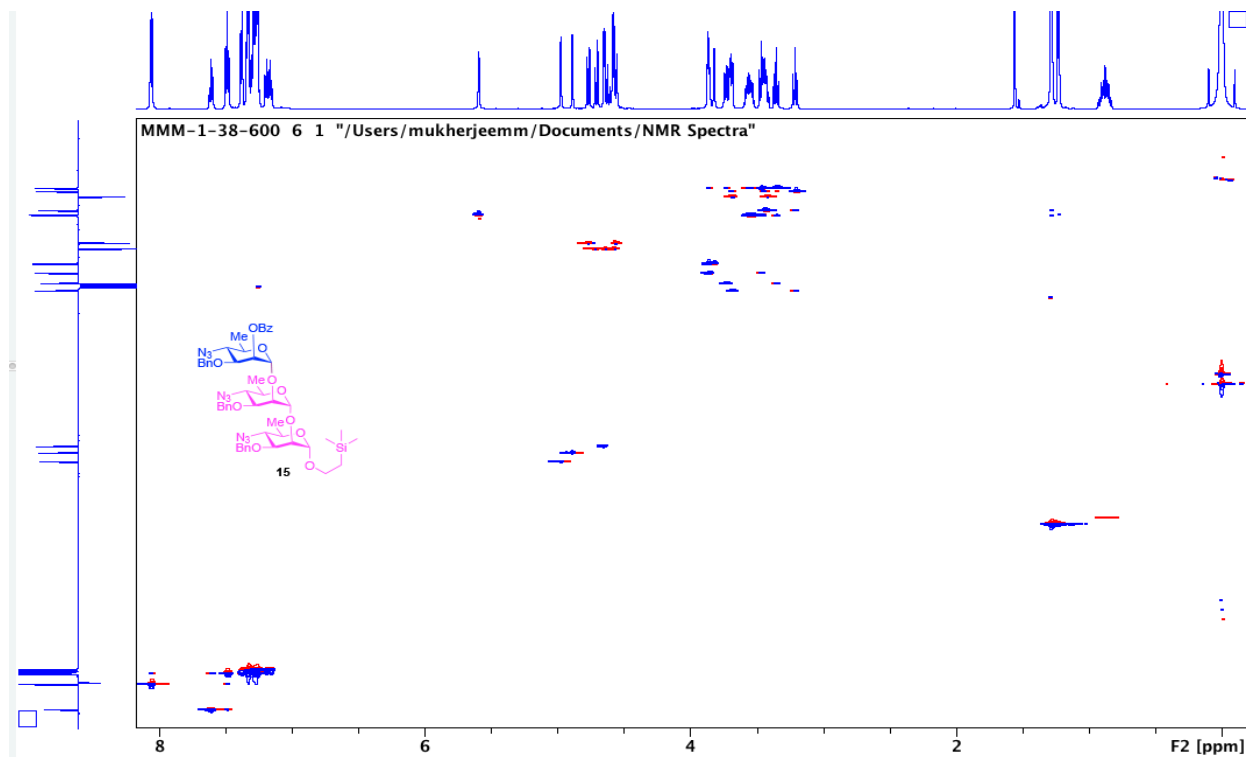

Fig. S28: HMBC NMR spectra of compound **15** (CDCl<sub>3</sub>).

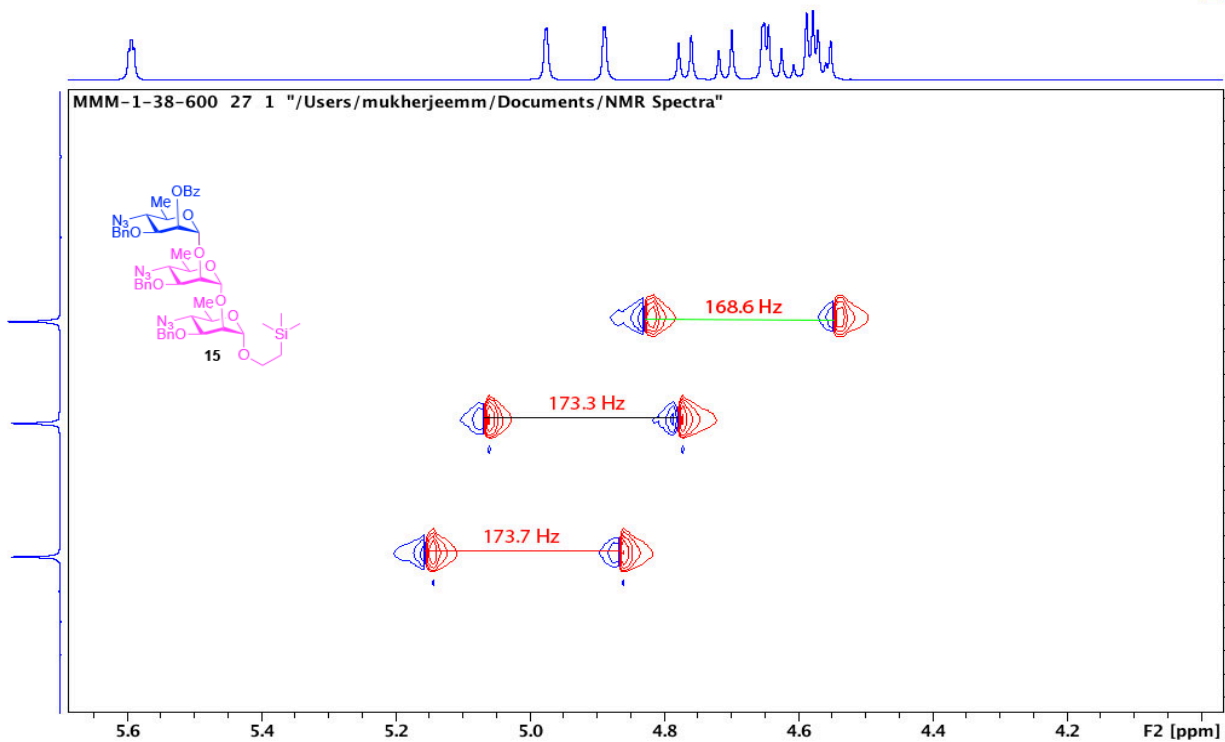

Fig. S29:  $^1\text{H}$ - $^{13}\text{C}$  Coupled NMR spectra of compound **15** ( $\text{CDCl}_3$ ).

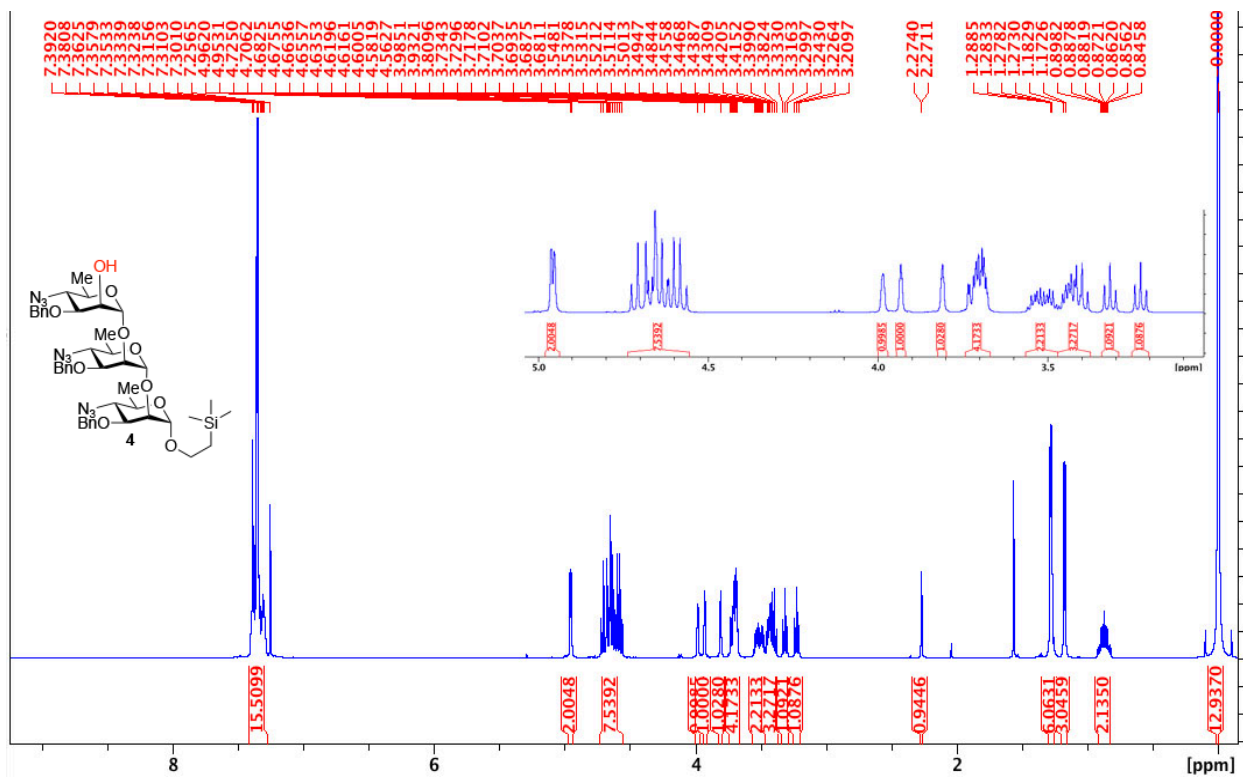

Fig. S30:  $^1\text{H}$  NMR spectra of compound **4** ( $\text{CDCl}_3$ , 600 MHz).

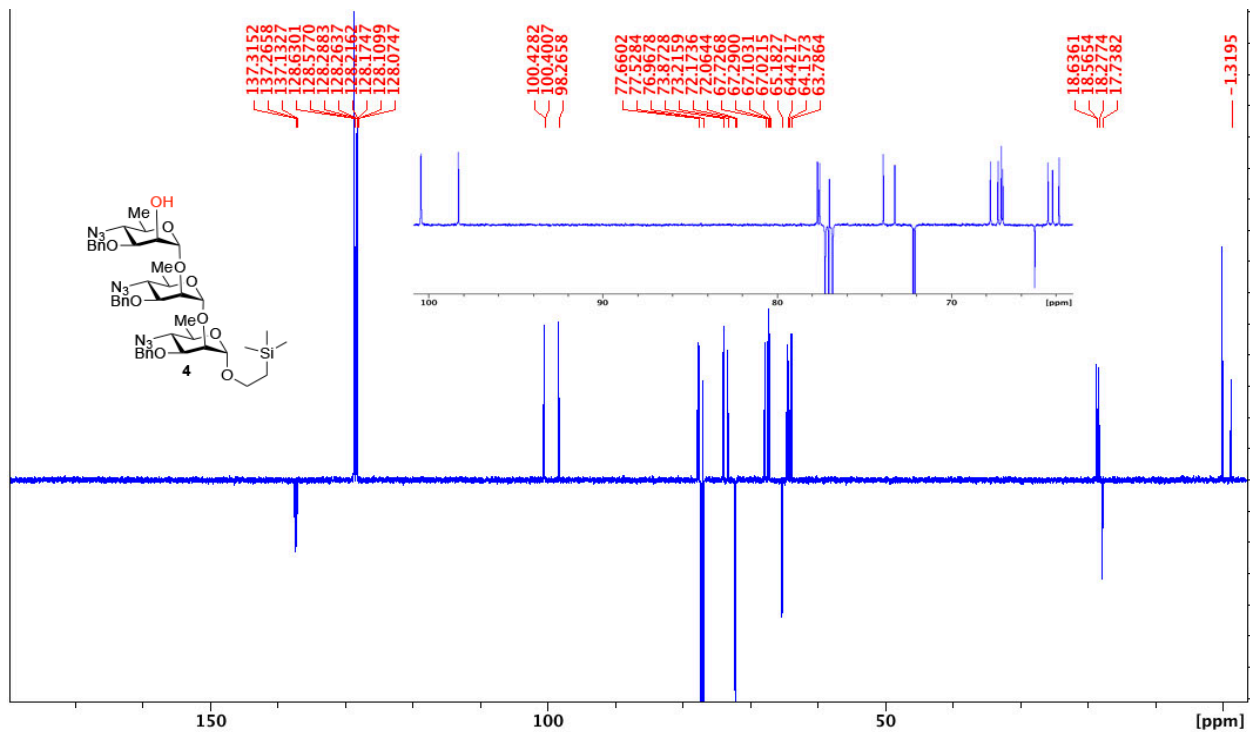

Fig. S31:  $^{13}\text{C}\{^1\text{H}\}$  NMR spectra of compound **4** ( $\text{CDCl}_3$ , 150 MHz).

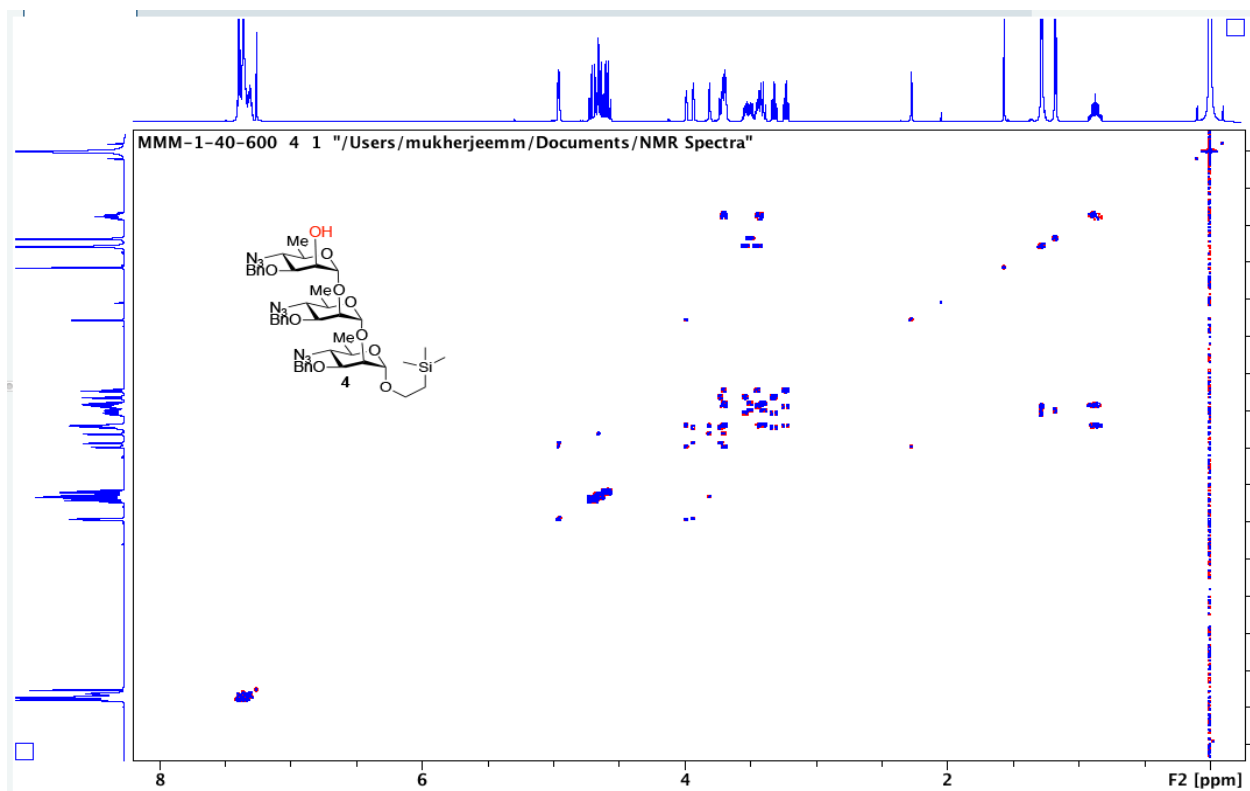

Fig. S32: COSY NMR spectra of compound **4** ( $\text{CDCl}_3$ , 600 MHz).

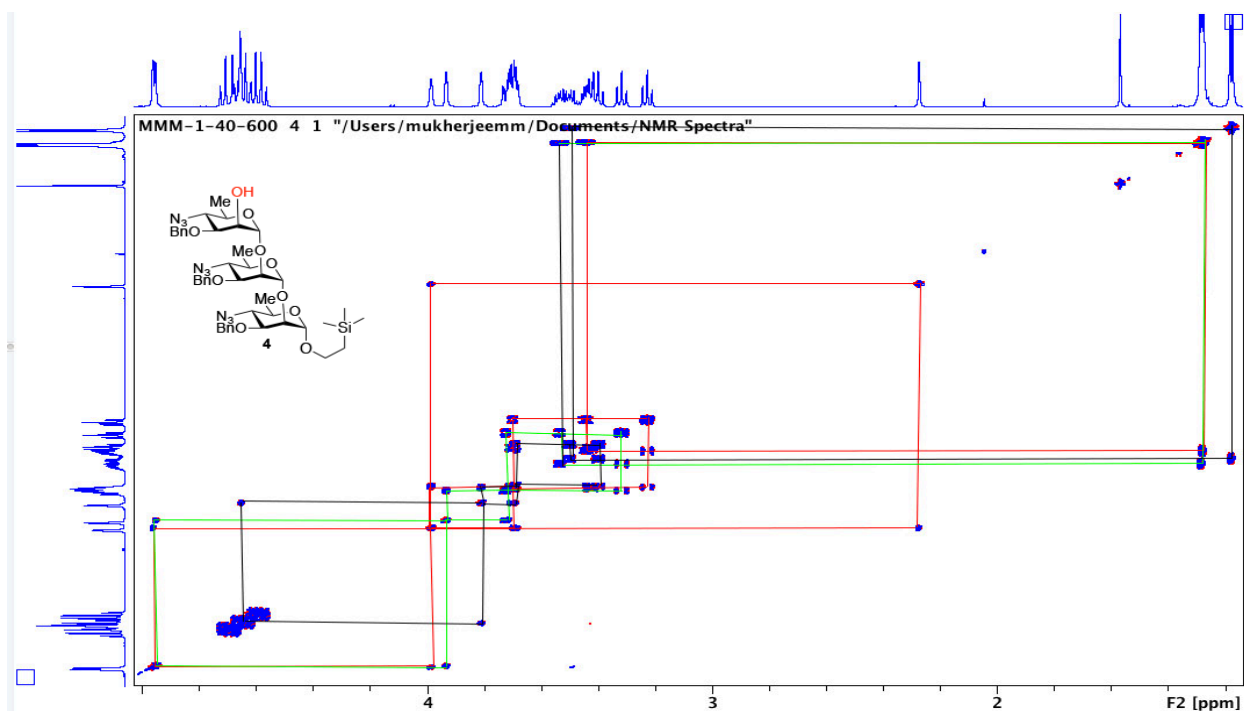

Fig. S33: COSY expansion (1.5 ppm to 5 ppm) NMR spectra of compound 4 (CDCl<sub>3</sub>, 600 MHz).

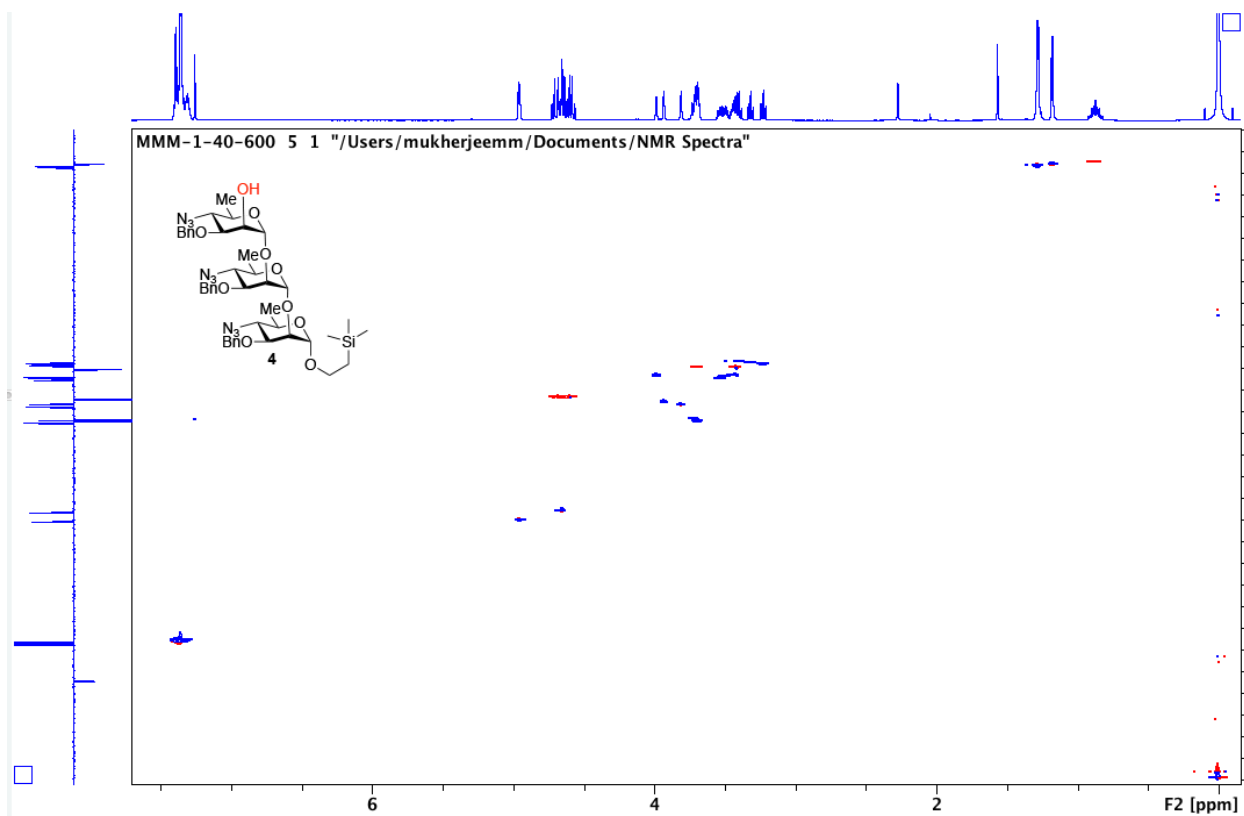

Fig. S34: HSQC NMR spectra of compound 4 (CDCl<sub>3</sub>).



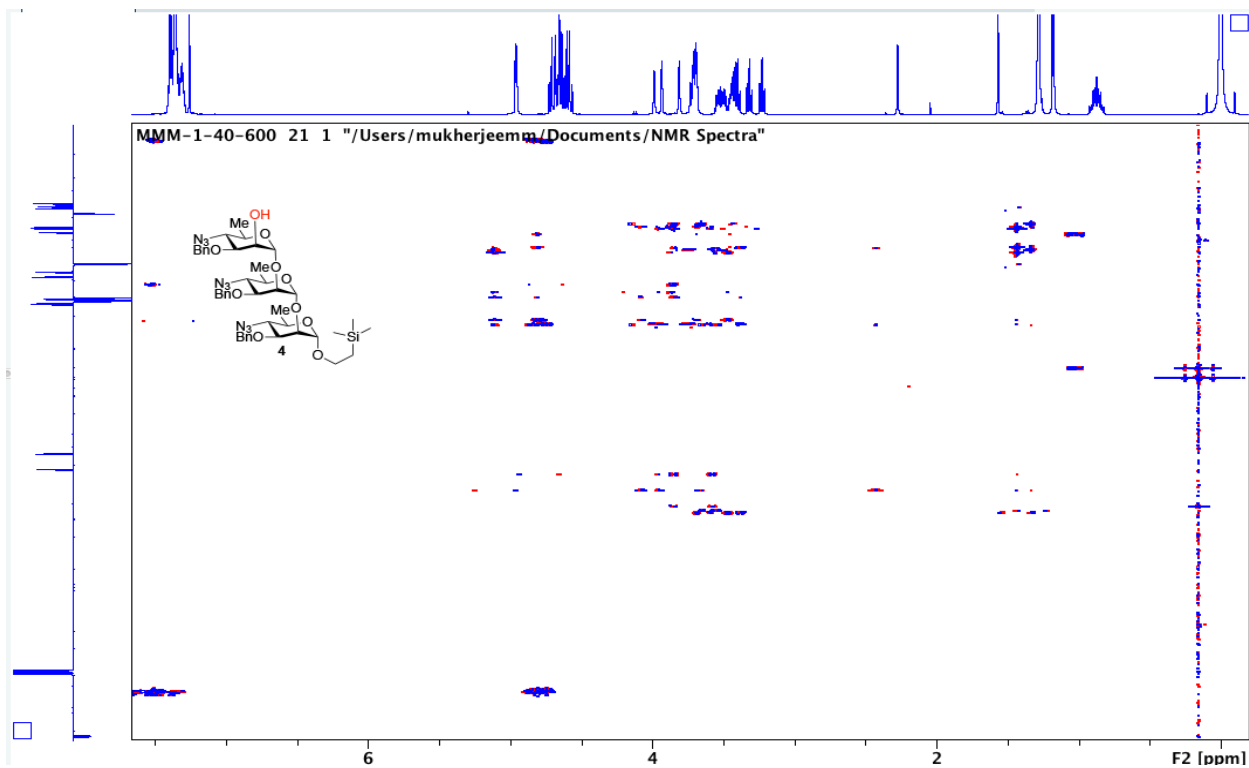

Fig. S35: HMBC NMR spectra of compound 4 (CDCl<sub>3</sub>).

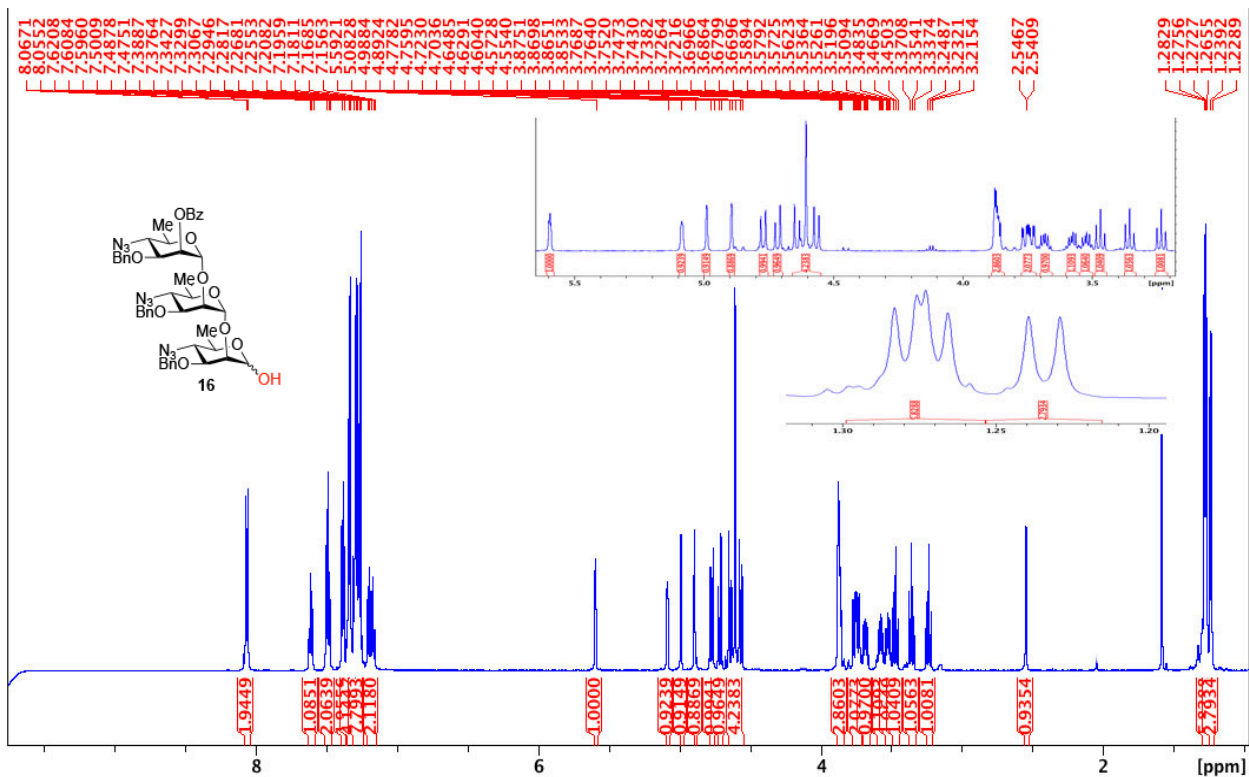

Fig. S36: <sup>1</sup>H NMR spectra of compound 16 (CDCl<sub>3</sub>, 600 MHz).

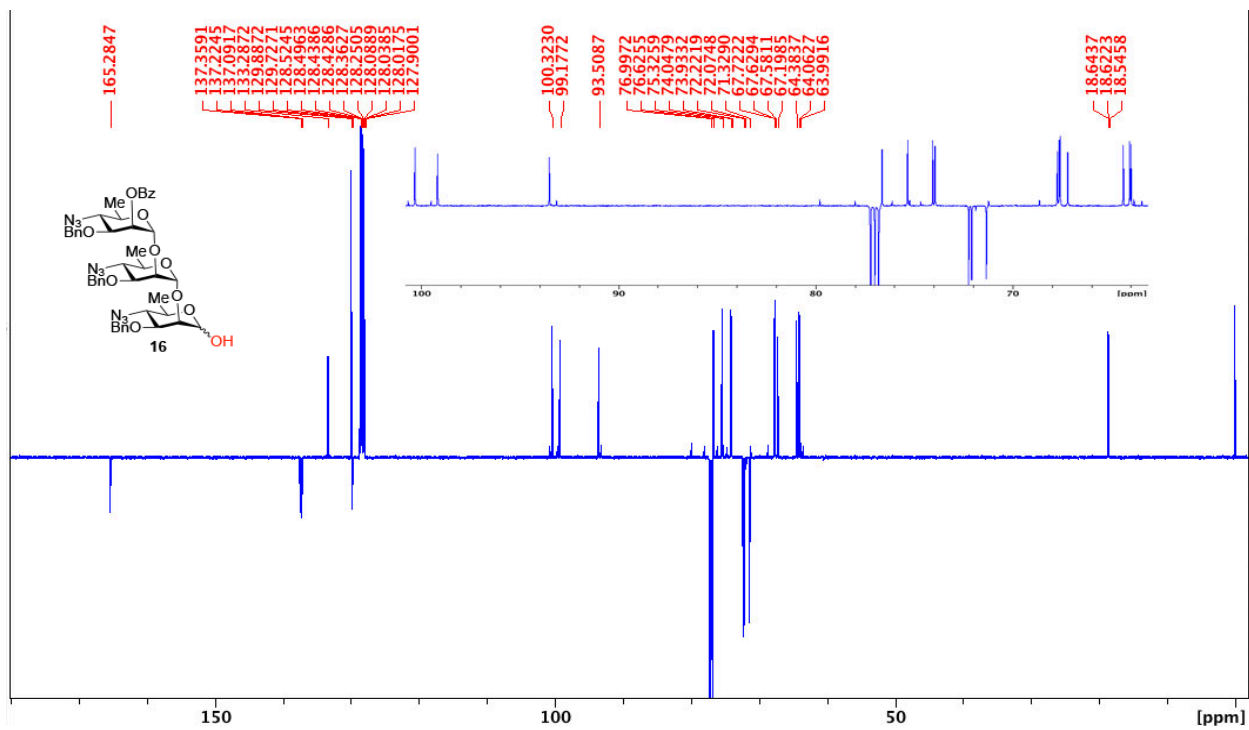

Fig. S37:  $^{13}\text{C}\{^1\text{H}\}$  NMR spectra of compound **16** ( $\text{CDCl}_3$ , 150 MHz).

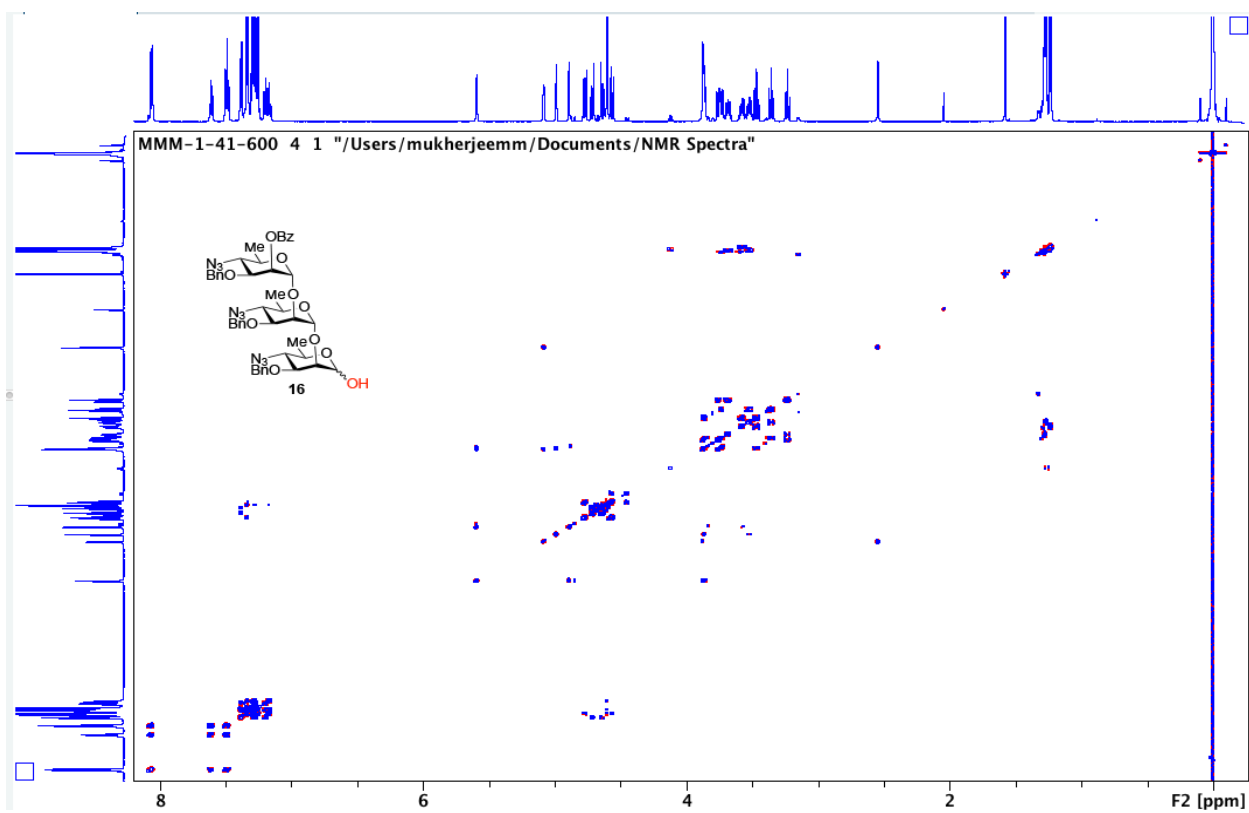

Fig. S38: COSY NMR spectra of compound **16** ( $\text{CDCl}_3$ , 600 MHz).

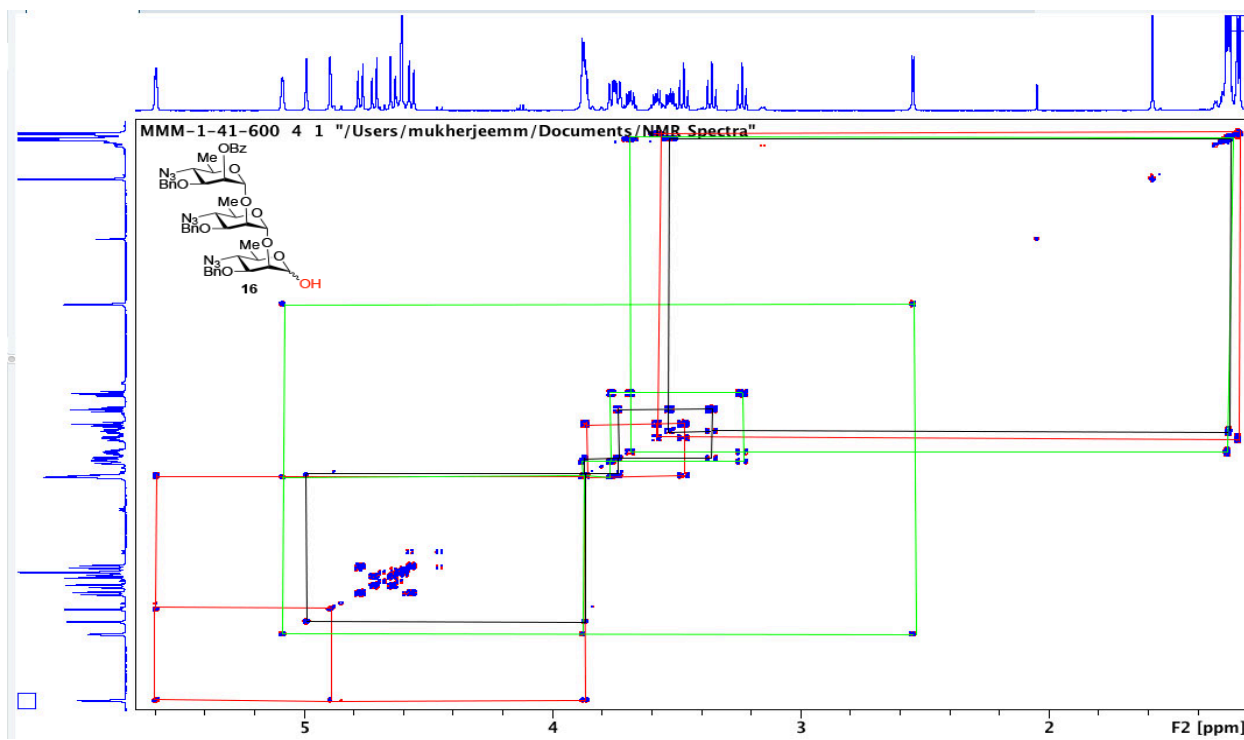

Fig. S39: COSY expansion (1.5 ppm to 5 ppm) NMR spectra of compound **16** (CDCl<sub>3</sub>, 600 MHz).

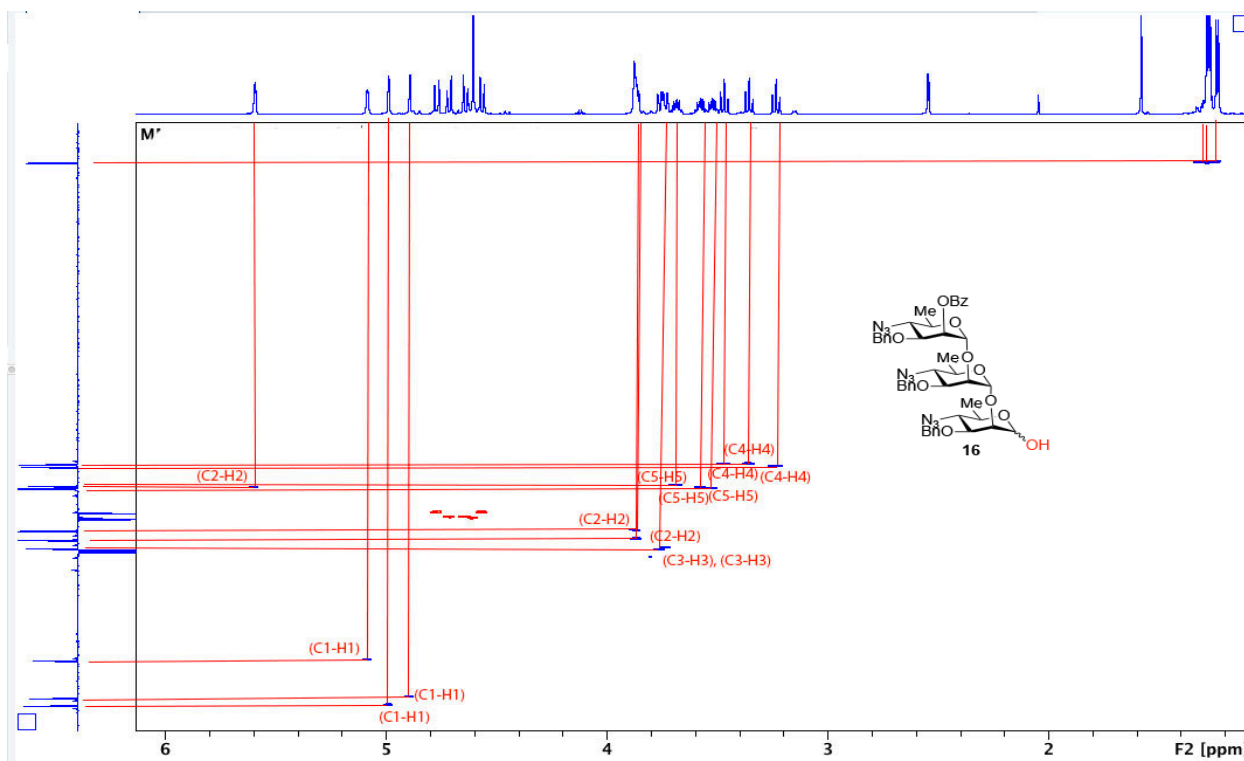

Fig. S40: HSQC NMR spectra of compound **16** (CDCl<sub>3</sub>).

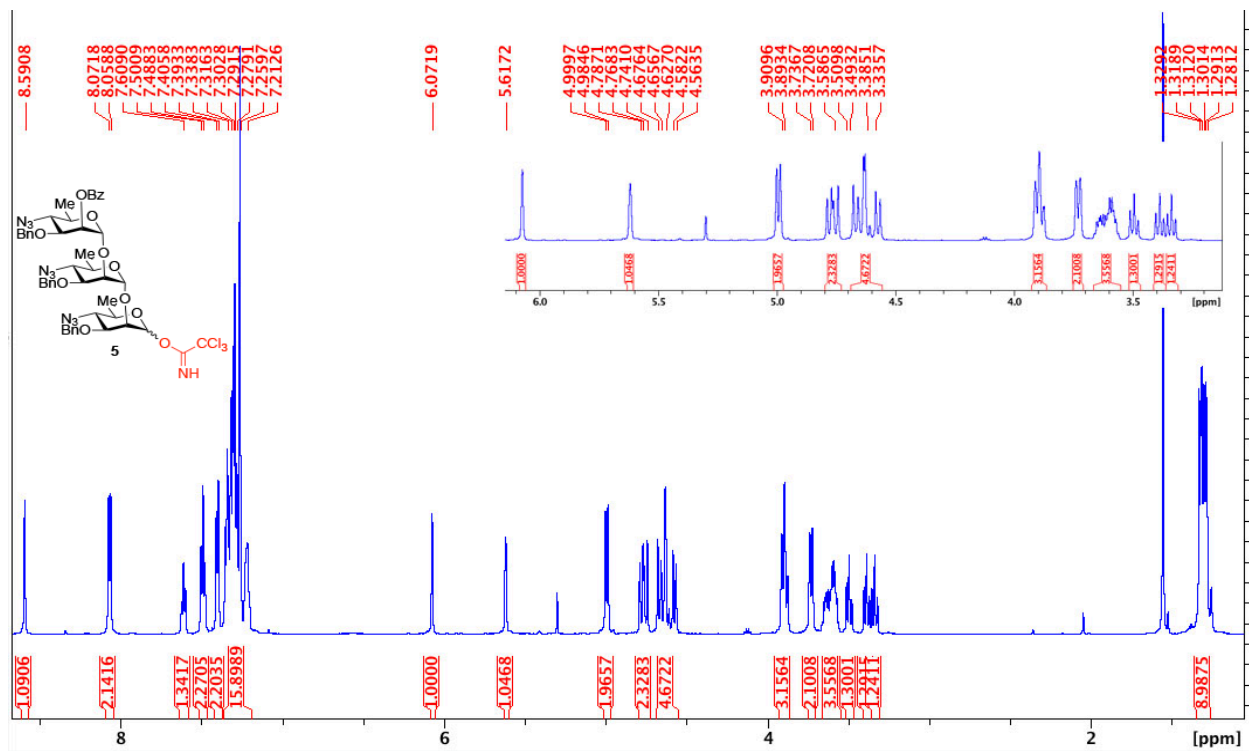

Fig. S41:  $^1\text{H}$  NMR spectra of compound **5** ( $\text{CDCl}_3$ , 600 MHz).

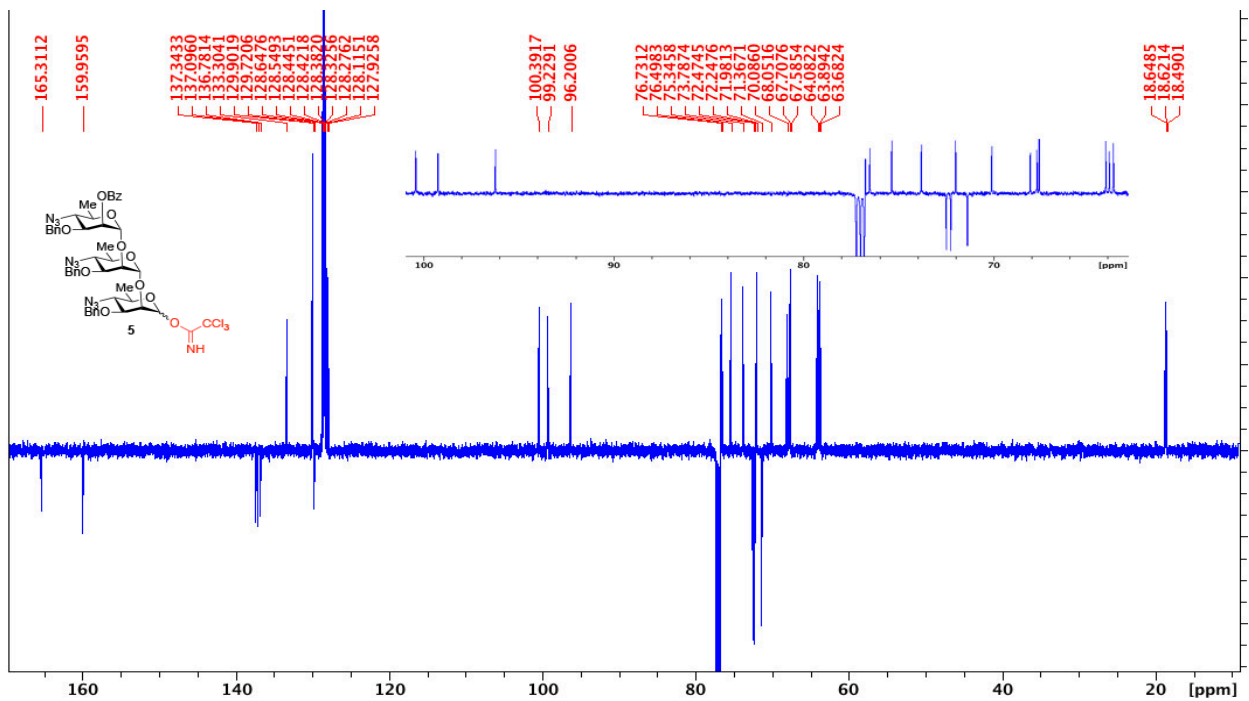

Fig. S42:  $^{13}\text{C}\{^1\text{H}\}$  NMR spectra of compound **5** ( $\text{CDCl}_3$ , 150 MHz).

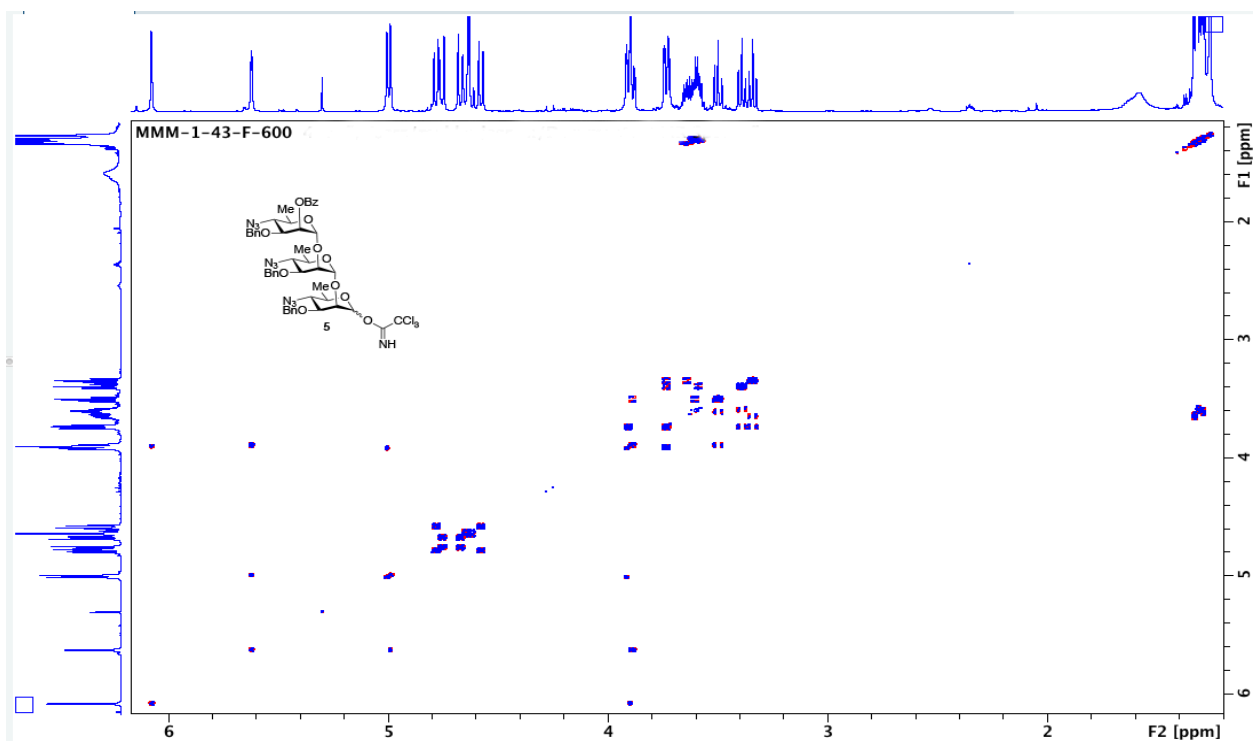

Fig. S43: COSY NMR spectra of compound **5** (CDCl<sub>3</sub>, 600 MHz).

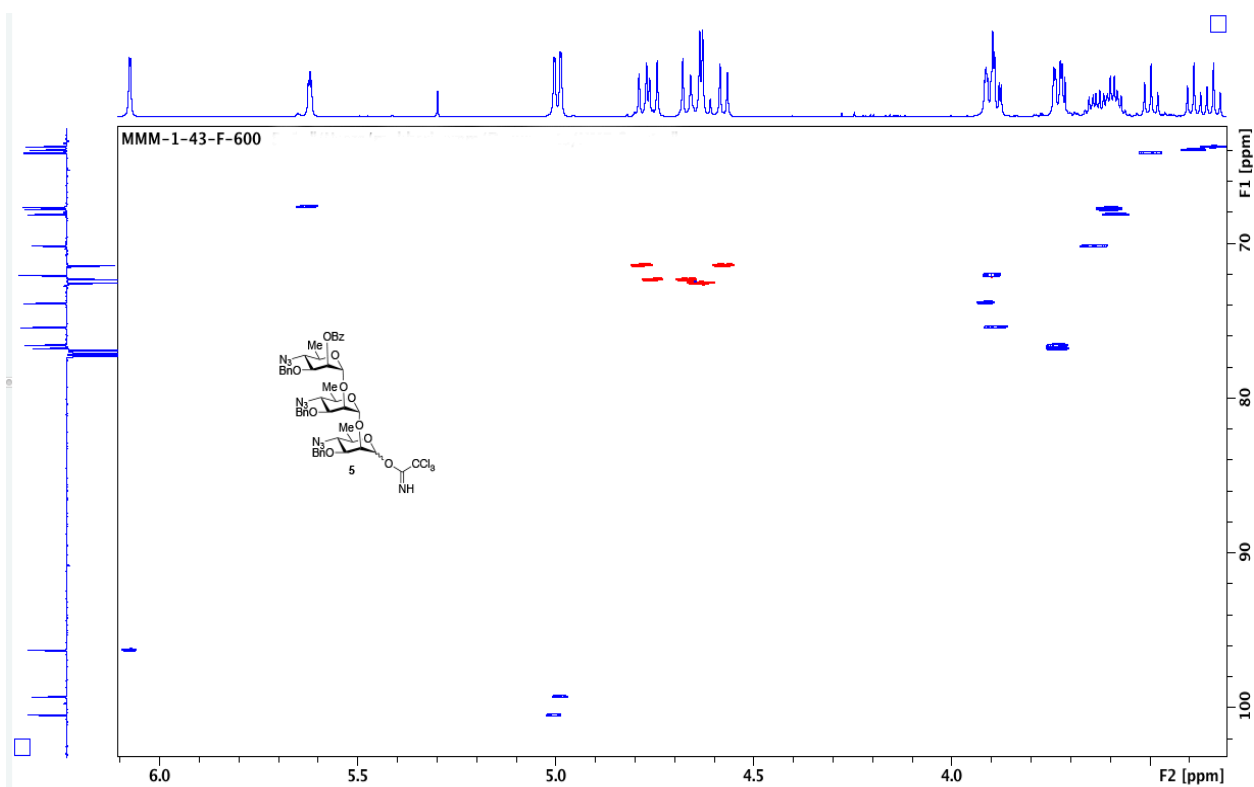

Fig. S44: HSQC NMR spectra of compound **5** (CDCl<sub>3</sub>).



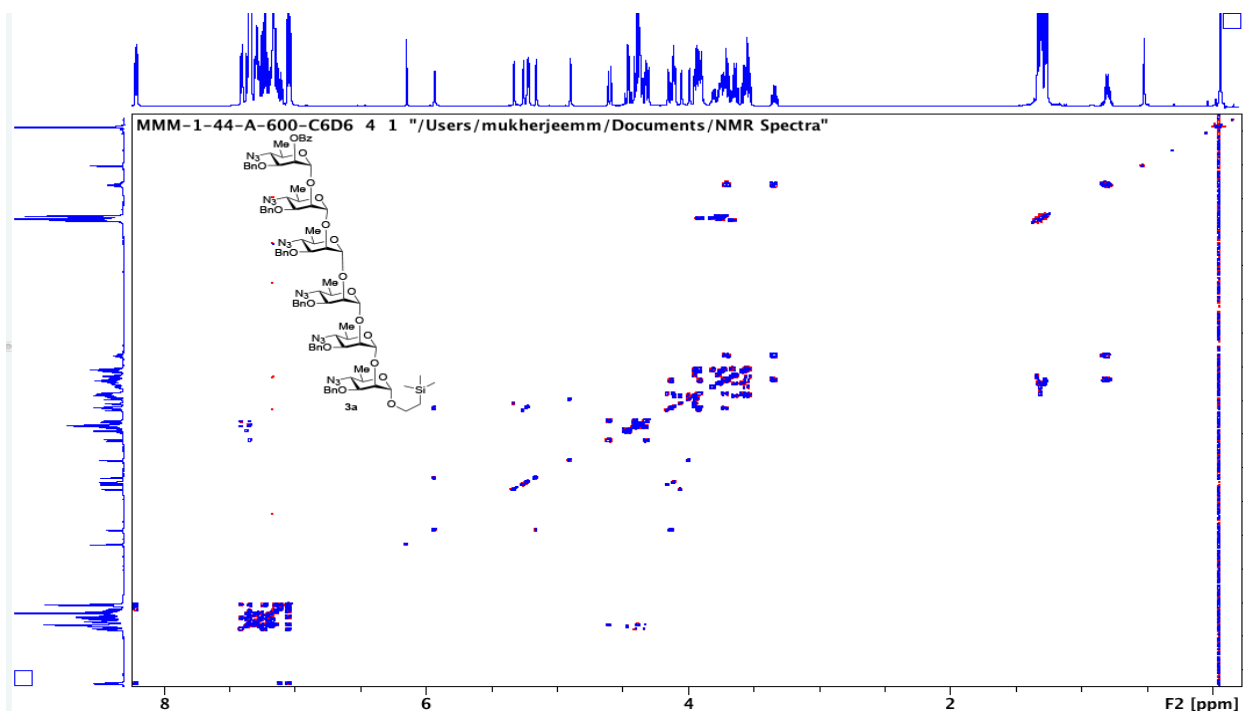

Fig. S47: COSY NMR spectra of compound **3a** ( $C_6D_6$ , 600 MHz).

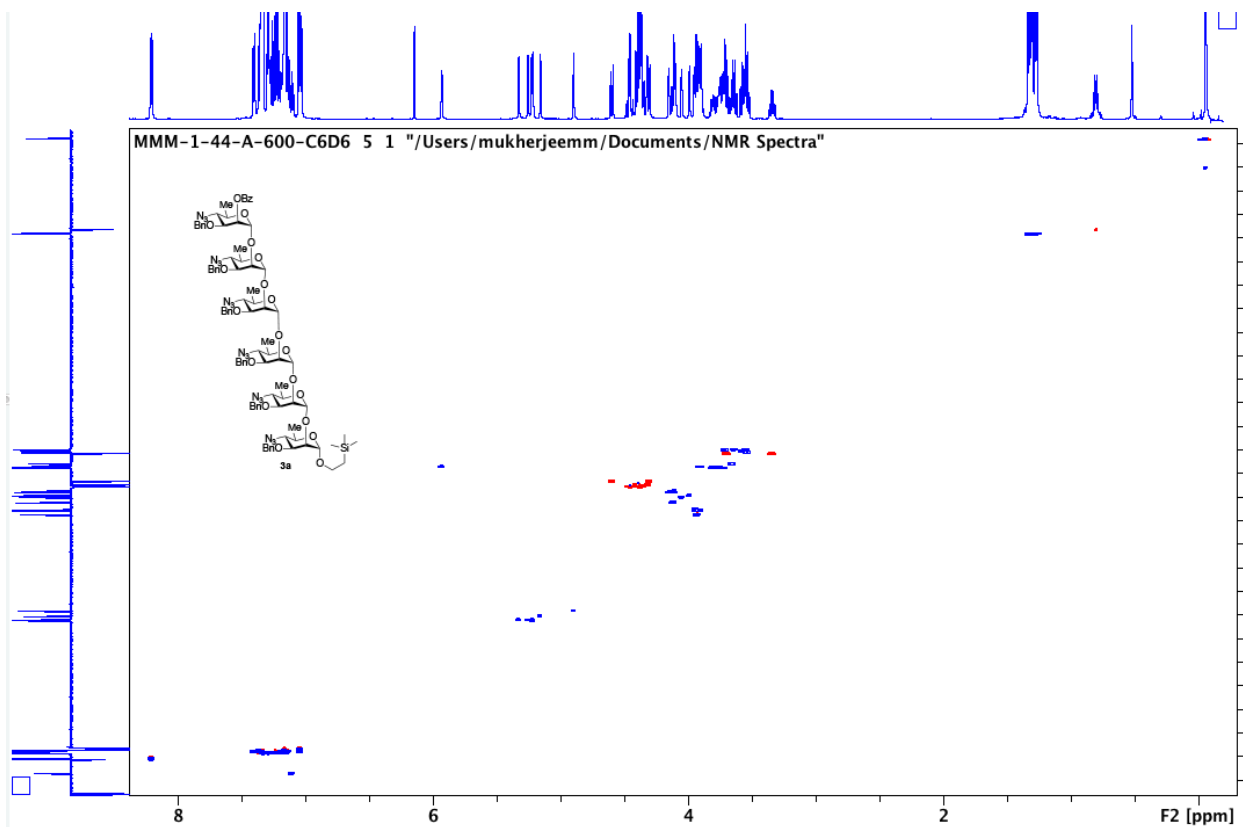

Fig. S48: HSQC NMR spectra of compound **3a** ( $C_6D_6$ ).

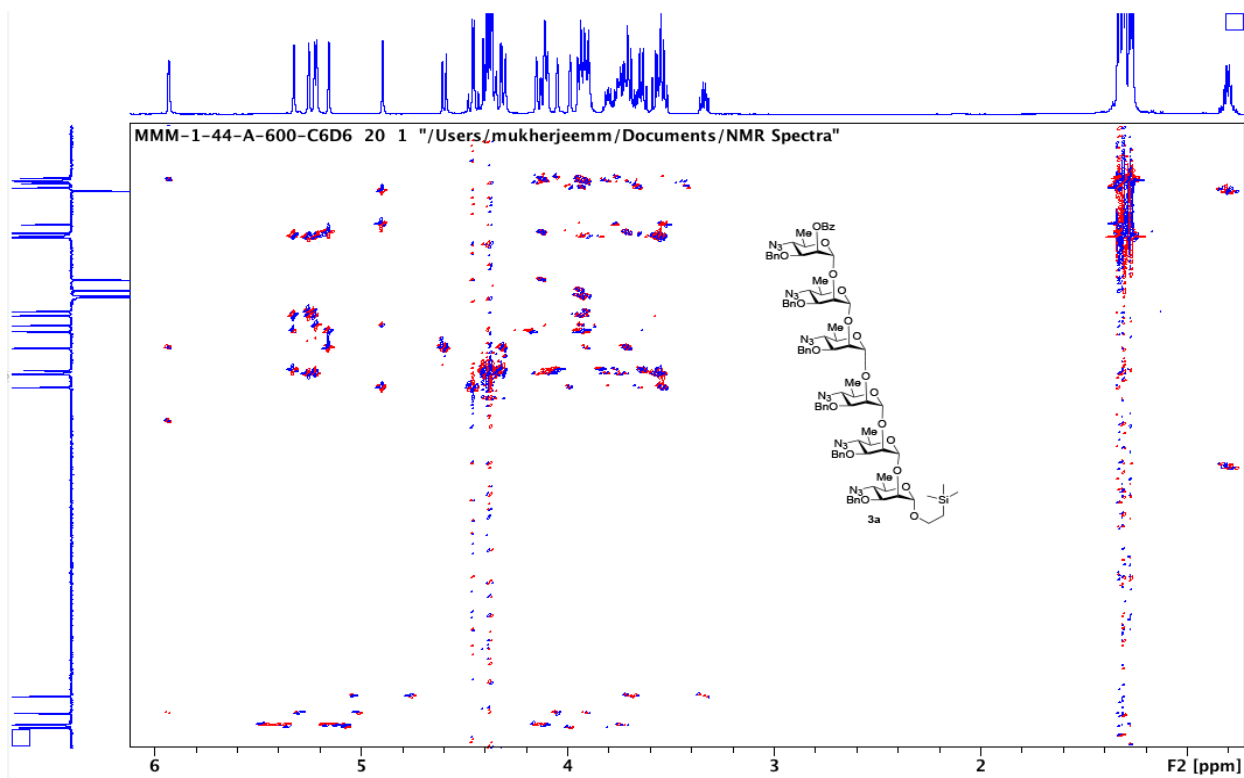

Fig. S49: HMBC NMR spectra of compound **3a** ( $C_6D_6$ ).

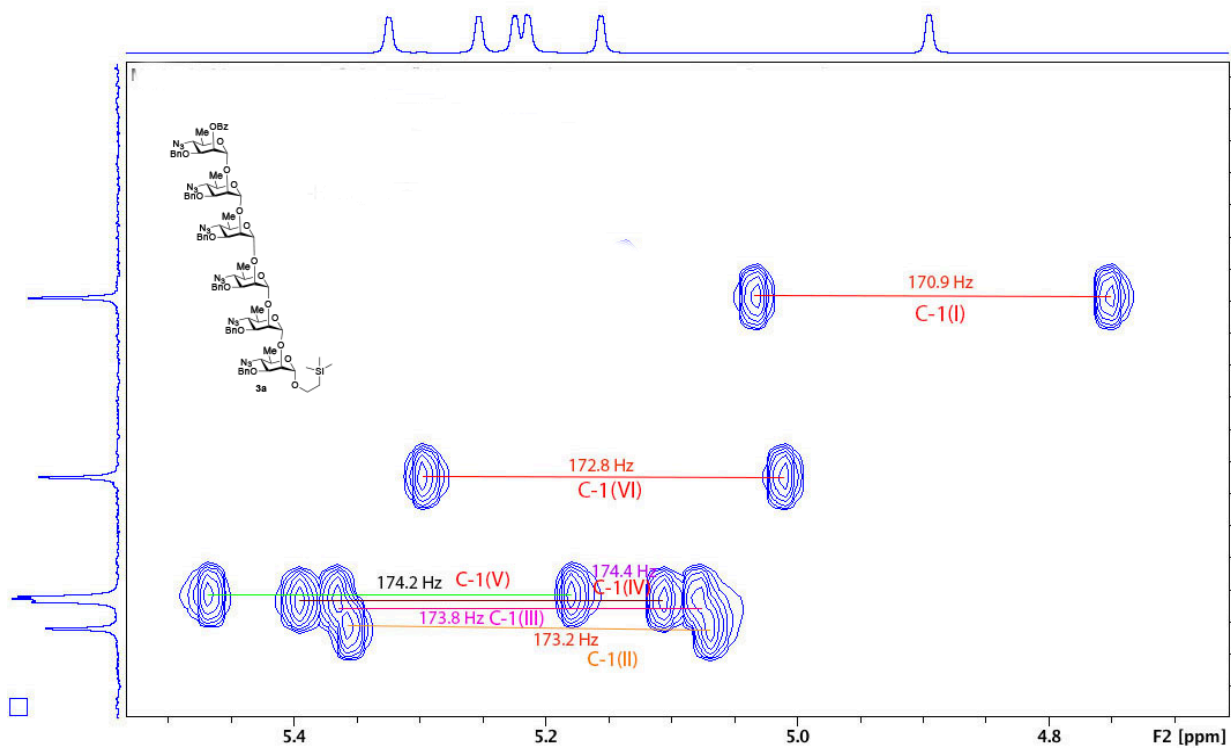

Fig. S50:  $^1H$ - $^{13}C$  Coupled NMR spectra of compound **3a** ( $C_6D_6$ ).





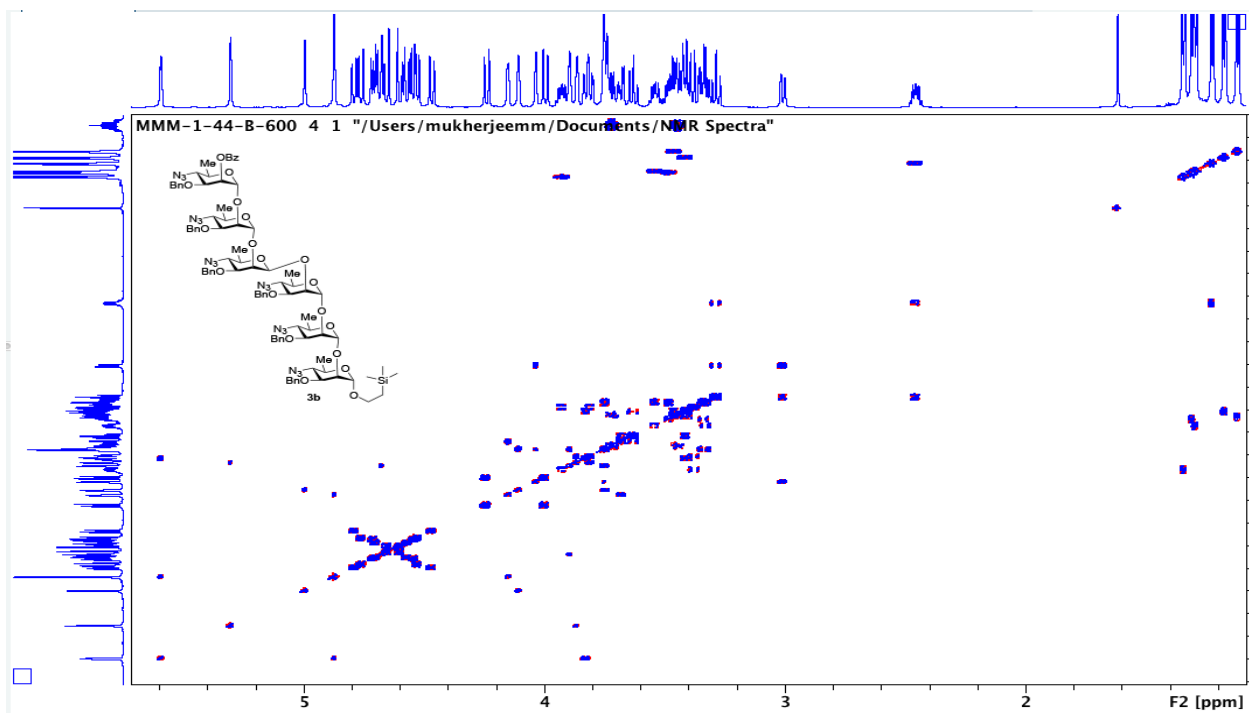

Fig. S53: COSY NMR spectra of compound **3b** (CDCl<sub>3</sub>, 600 MHz).

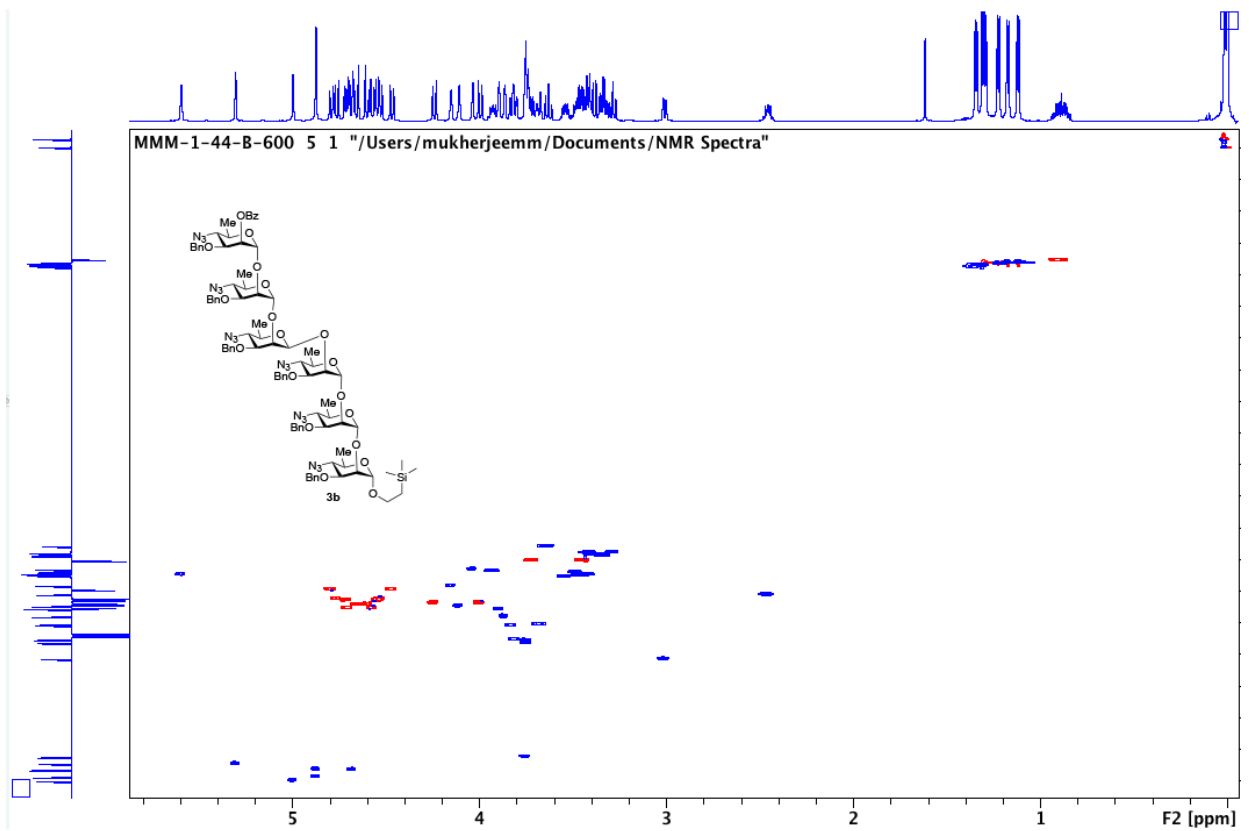

Fig. S54: HSQC NMR spectra of compound **3b** (CDCl<sub>3</sub>).

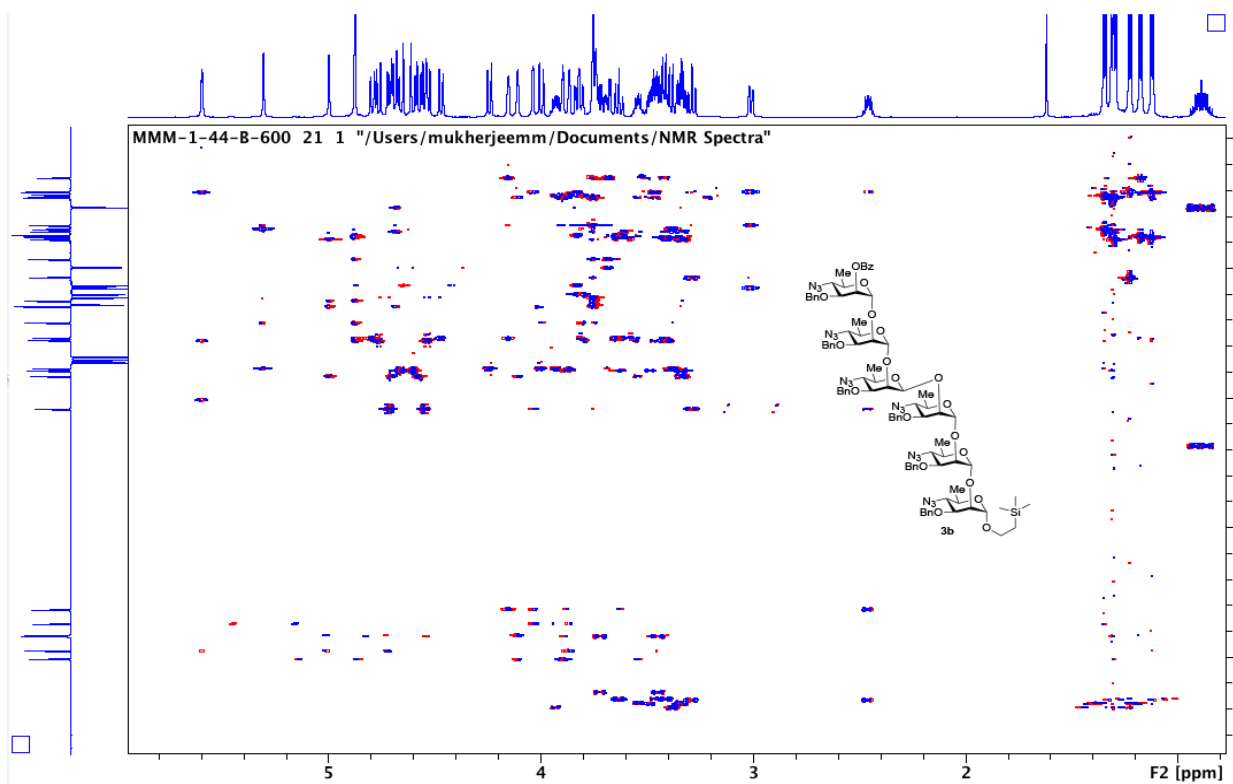

Fig. S55: HMBC NMR spectra of compound **3b** (CDCl<sub>3</sub>).

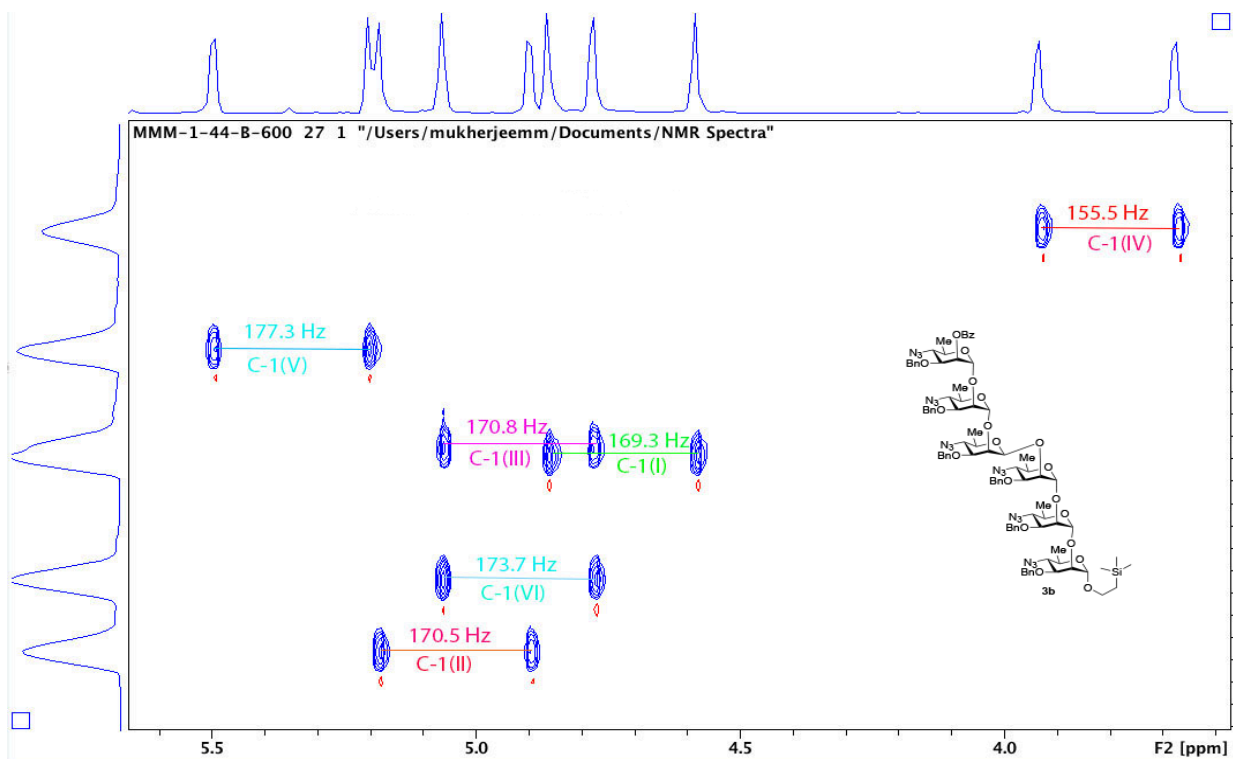

Fig. S56: <sup>1</sup>H-<sup>13</sup>C Coupled NMR spectra of compound **3b** (CDCl<sub>3</sub>).

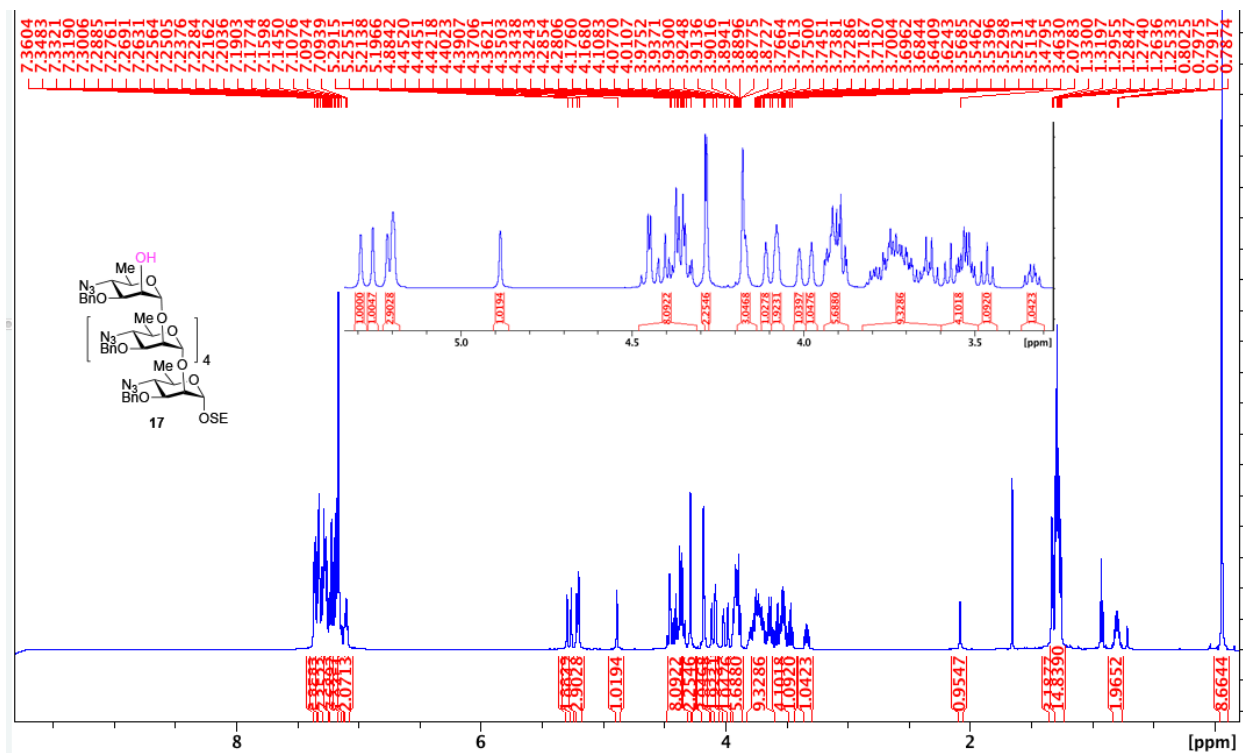

Fig. S57: <sup>1</sup>H NMR spectra of compound 17 (C<sub>6</sub>D<sub>6</sub>, 600 MHz).

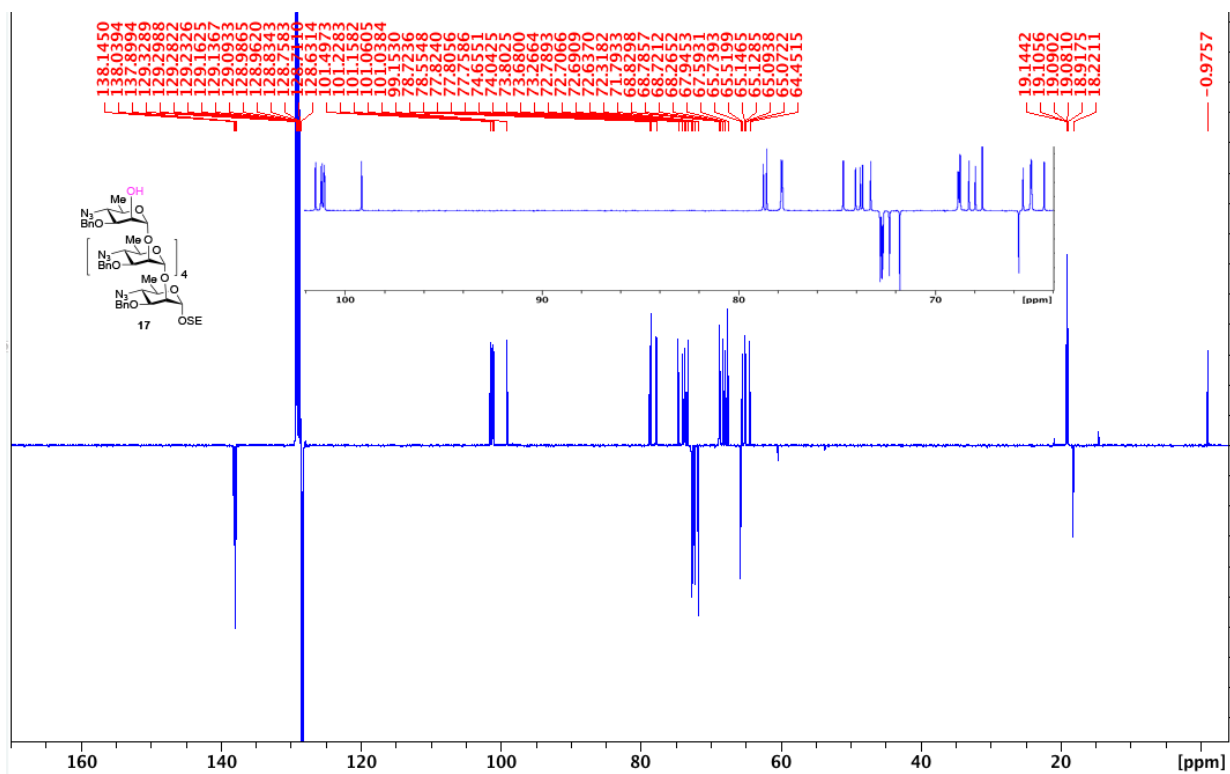

Fig. S58: <sup>13</sup>C{<sup>1</sup>H} NMR spectra of compound 17 (C<sub>6</sub>D<sub>6</sub>, 150 MHz).

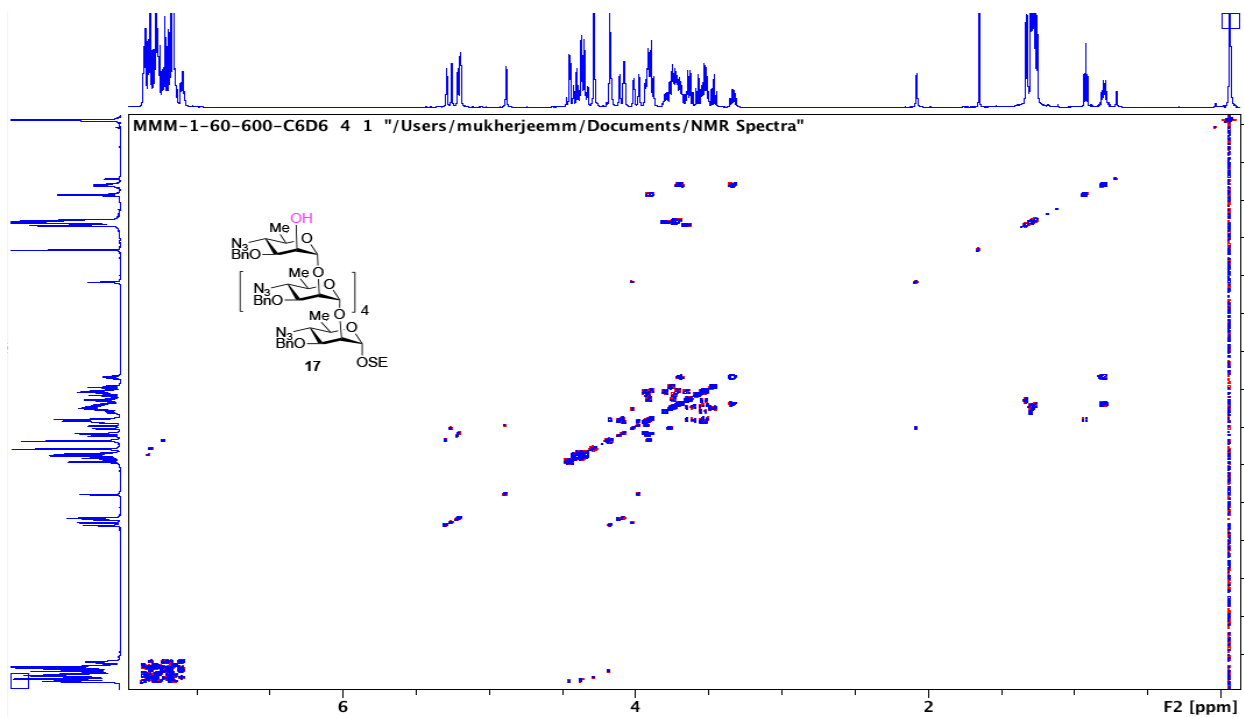

Fig. S59: COSY NMR spectra of compound **17** (C<sub>6</sub>D<sub>6</sub>, 600 MHz).

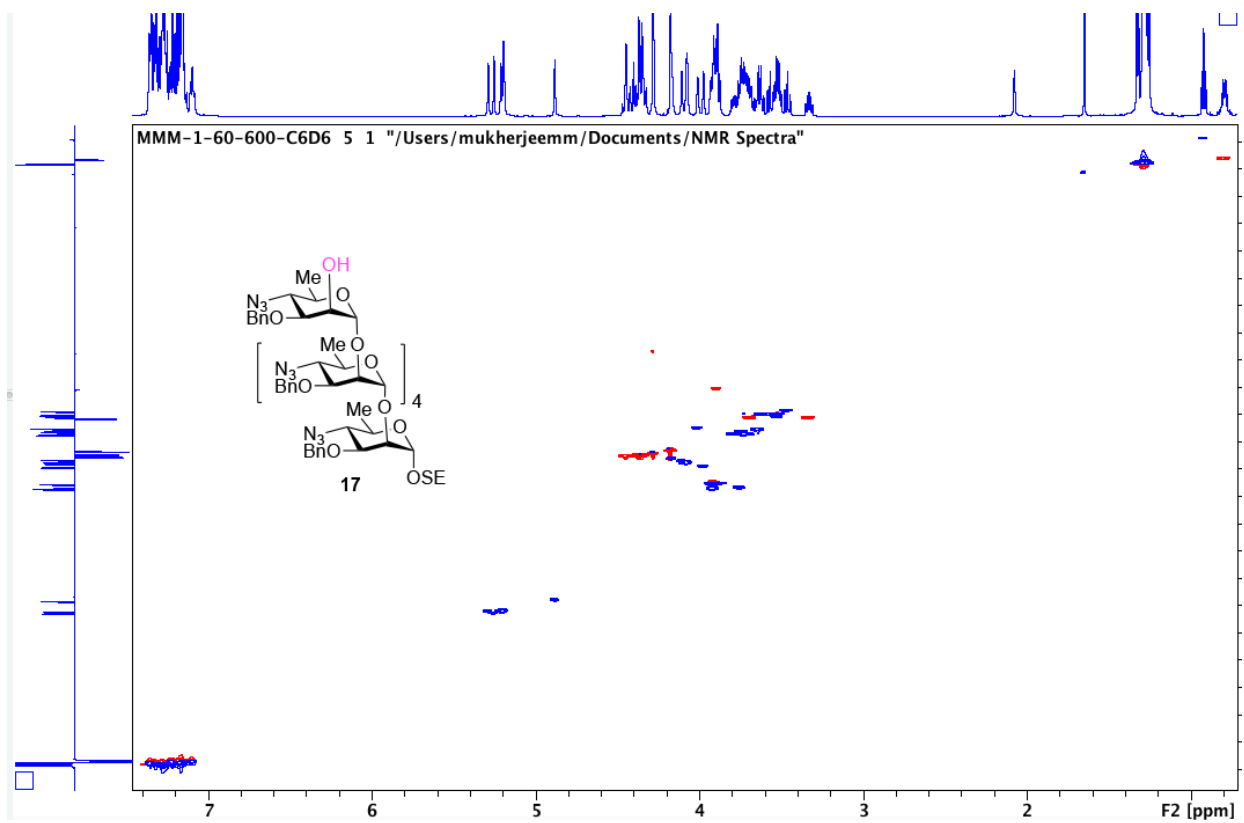

Fig. S60: HSQC NMR spectra of compound **17** (C<sub>6</sub>D<sub>6</sub>).

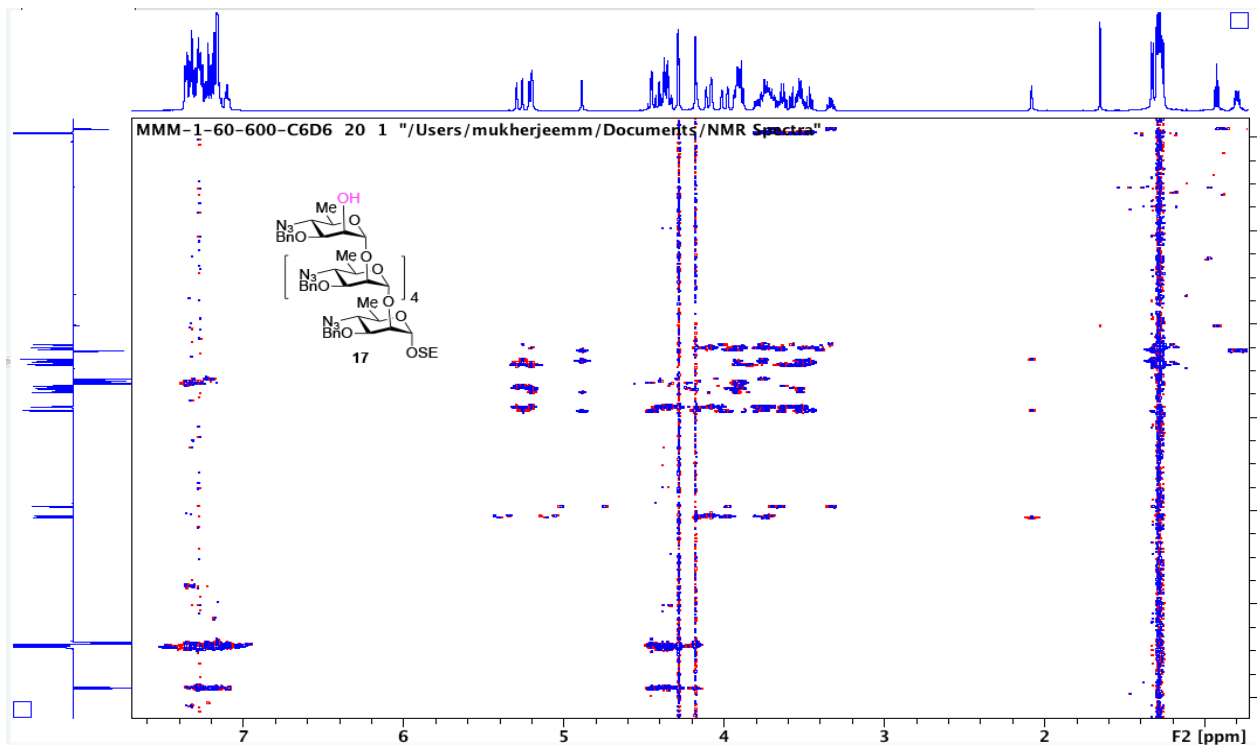

Fig. S61: HMBC NMR spectra of compound 17 (C<sub>6</sub>D<sub>6</sub>).

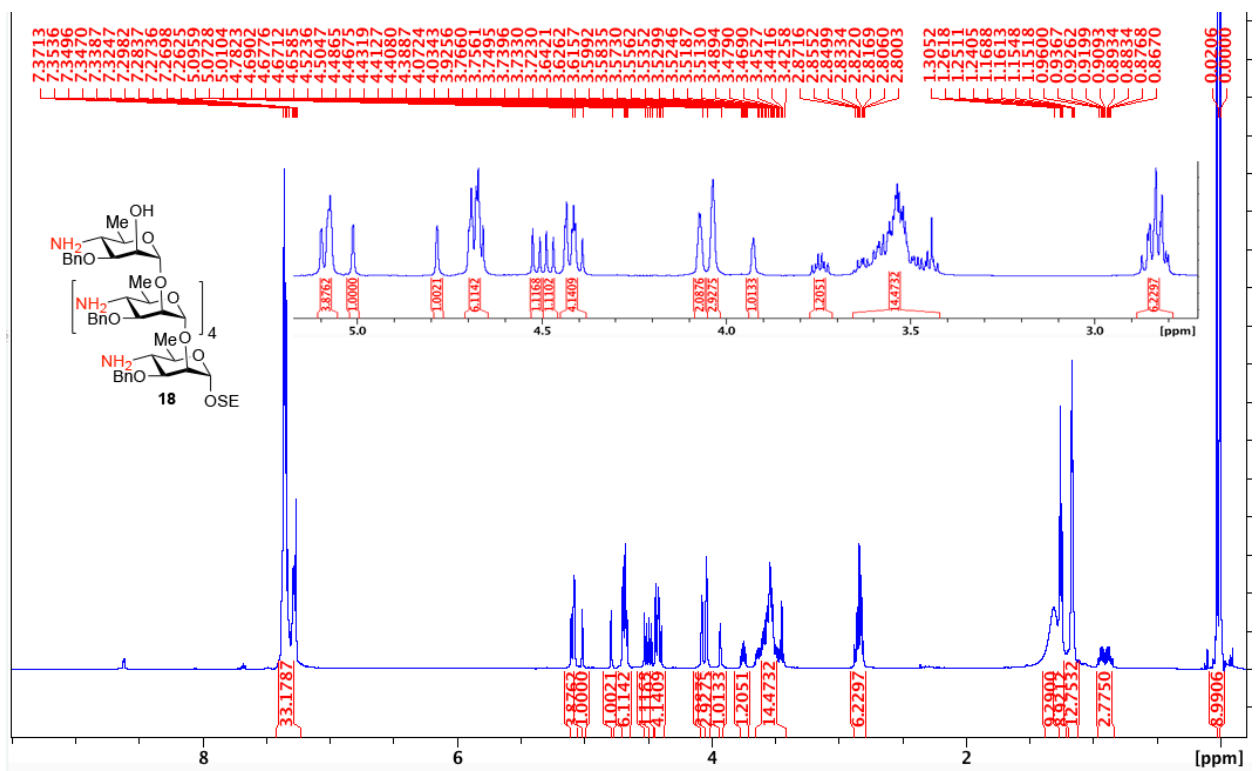

Fig. S62: <sup>1</sup>H NMR spectra of compound 18 (CDCl<sub>3</sub>, 600 MHz).

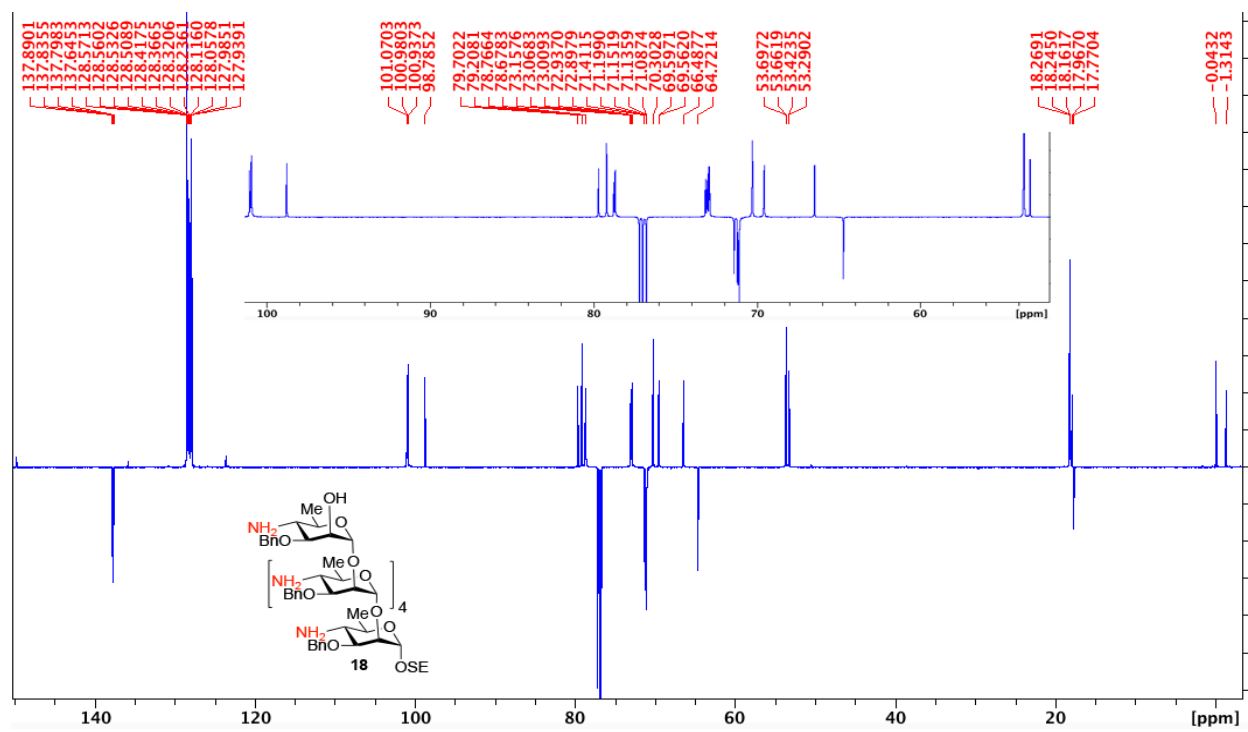

Fig. S63:  $^{13}\text{C}\{^1\text{H}\}$  NMR spectra of compound **18** ( $\text{CDCl}_3$ , 150 MHz).

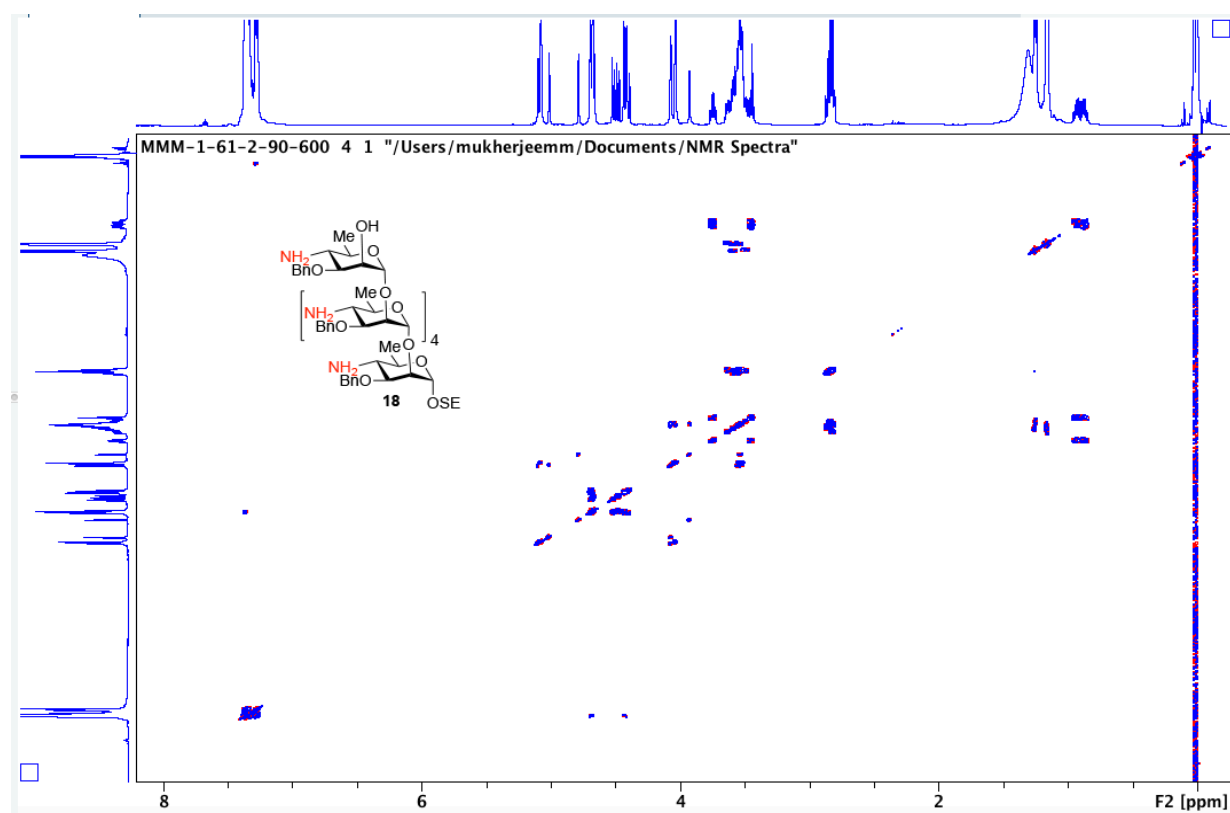

Fig. S64: COSY NMR spectra of compound **18** ( $\text{CDCl}_3$ , 600 MHz).

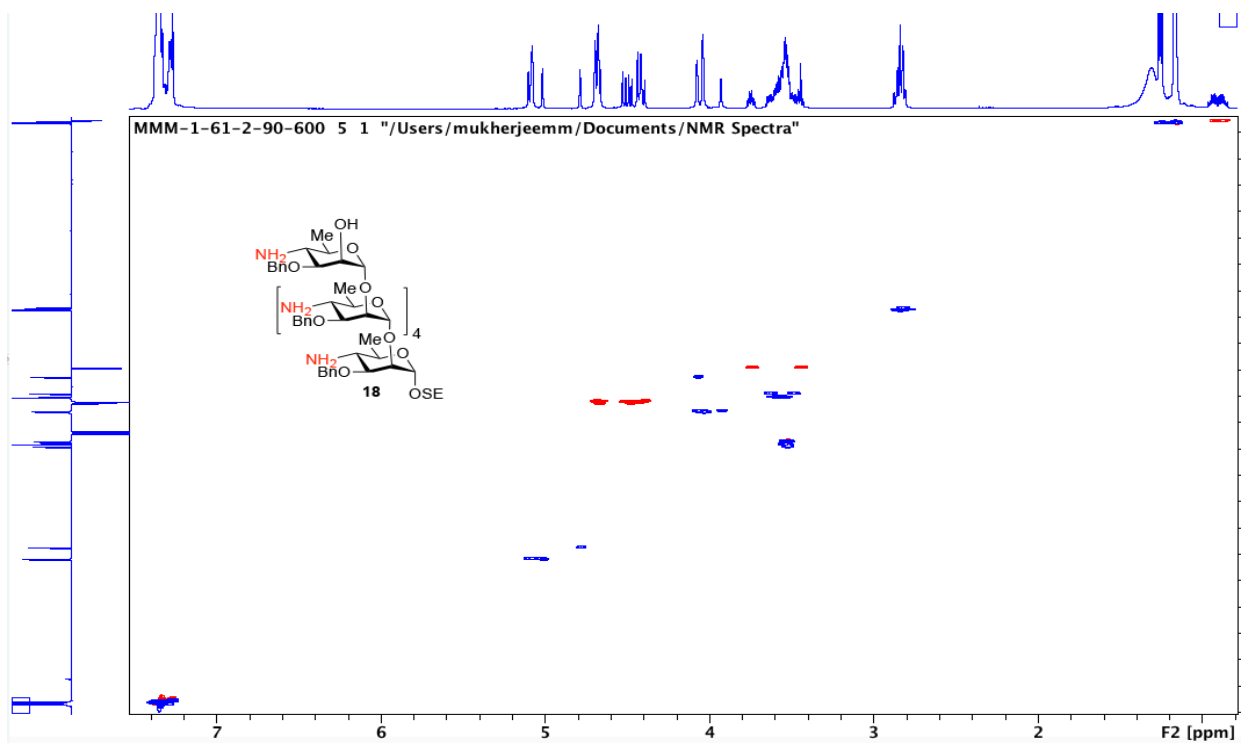

Fig. S65: HSQC NMR spectra of compound **18** (CDCl<sub>3</sub>).

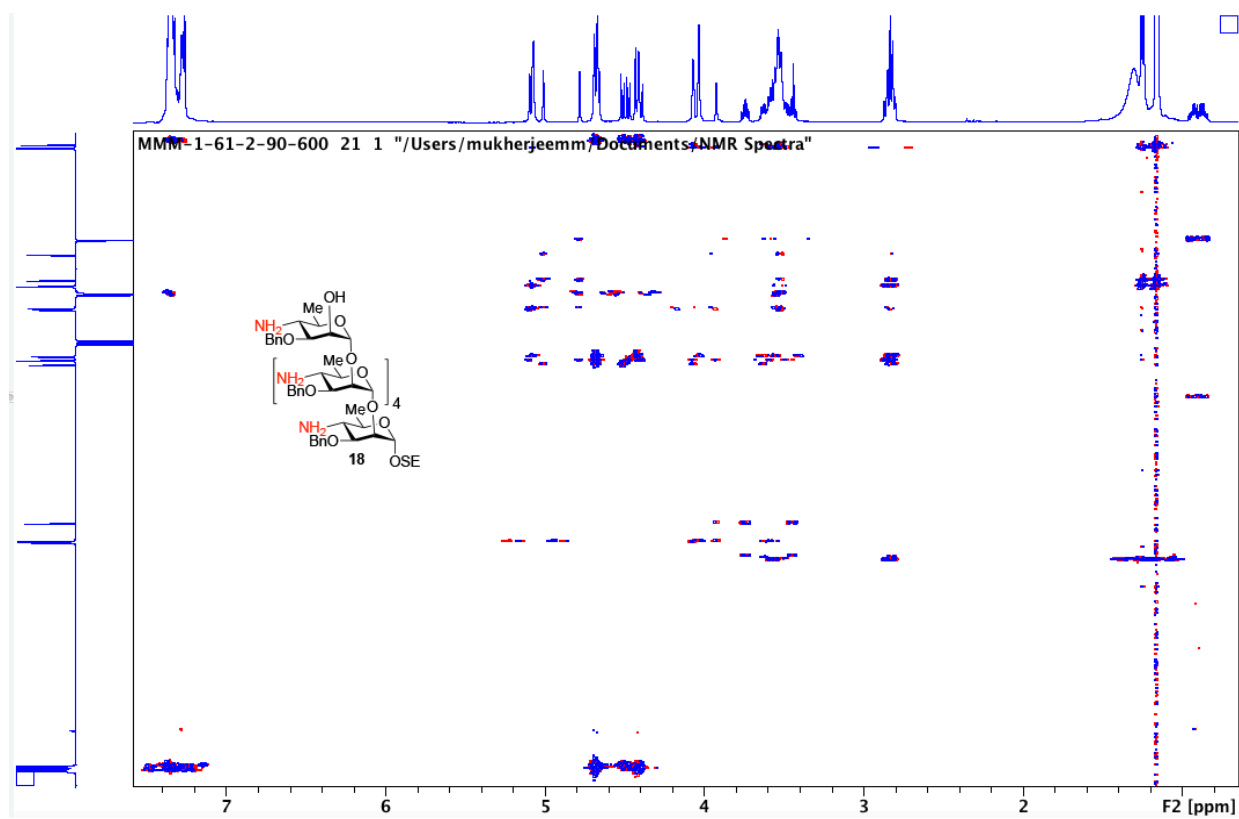

Fig. S66: HMBC NMR spectra of compound **18** (CDCl<sub>3</sub>).





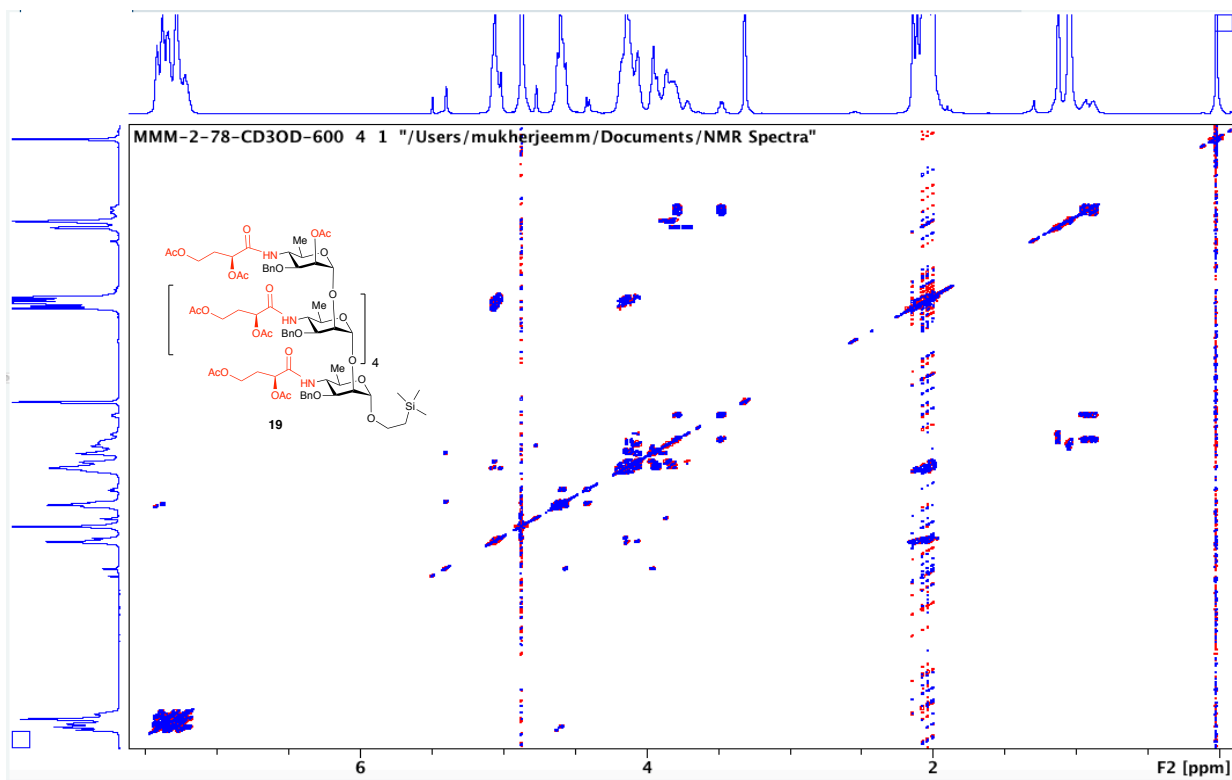

Fig. S69: COSY NMR spectra of compound **19** (CD<sub>3</sub>OD, 600 MHz).

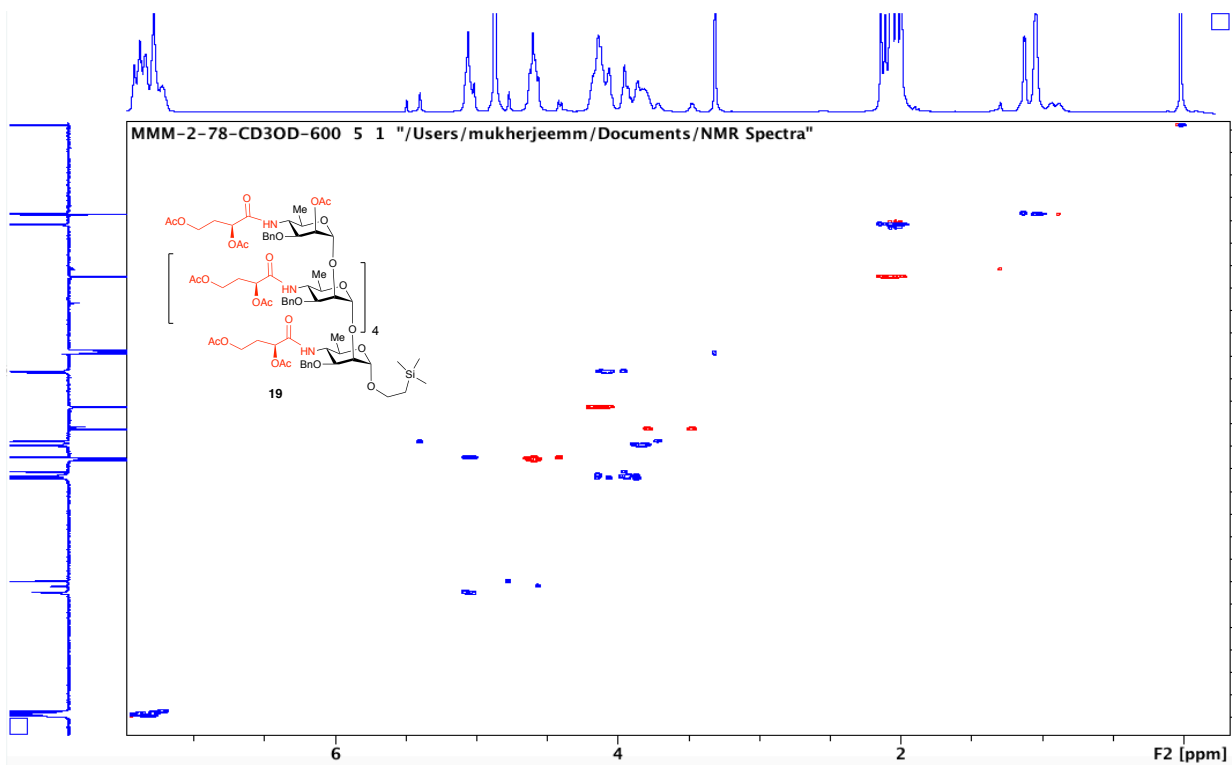

Fig. S70: HSQC NMR spectra of compound **19** (CD<sub>3</sub>OD).

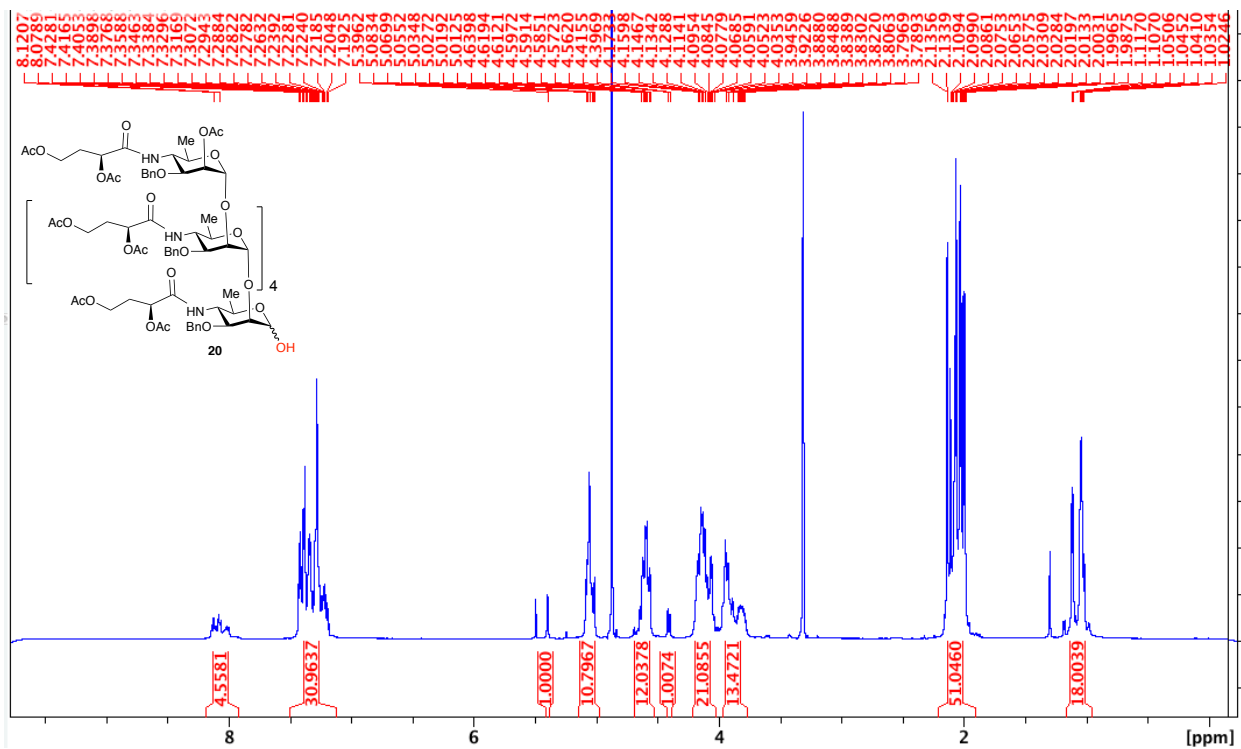

Fig. S71: <sup>1</sup>H NMR spectra of compound **20** (CD<sub>3</sub>OD, 600 MHz).

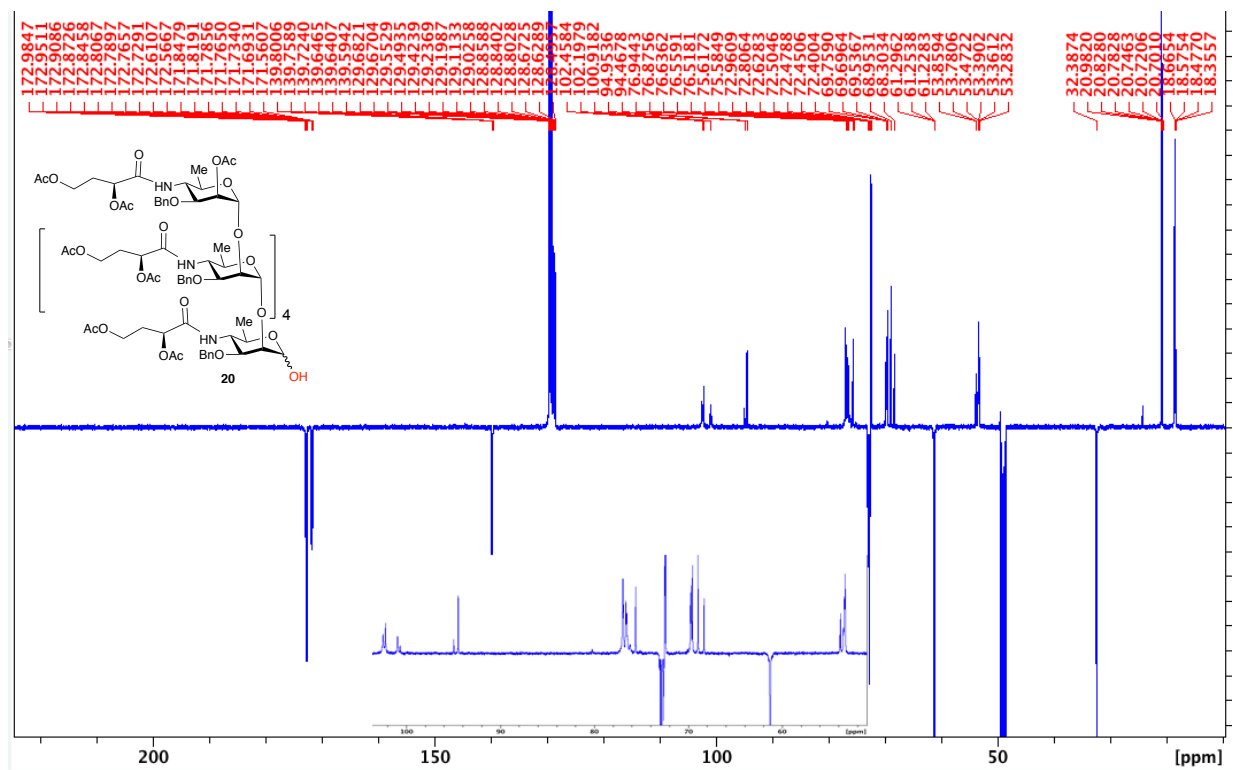

Fig. S72: <sup>13</sup>C{<sup>1</sup>H} NMR spectra of compound **20** (CD<sub>3</sub>OD, 150 MHz).

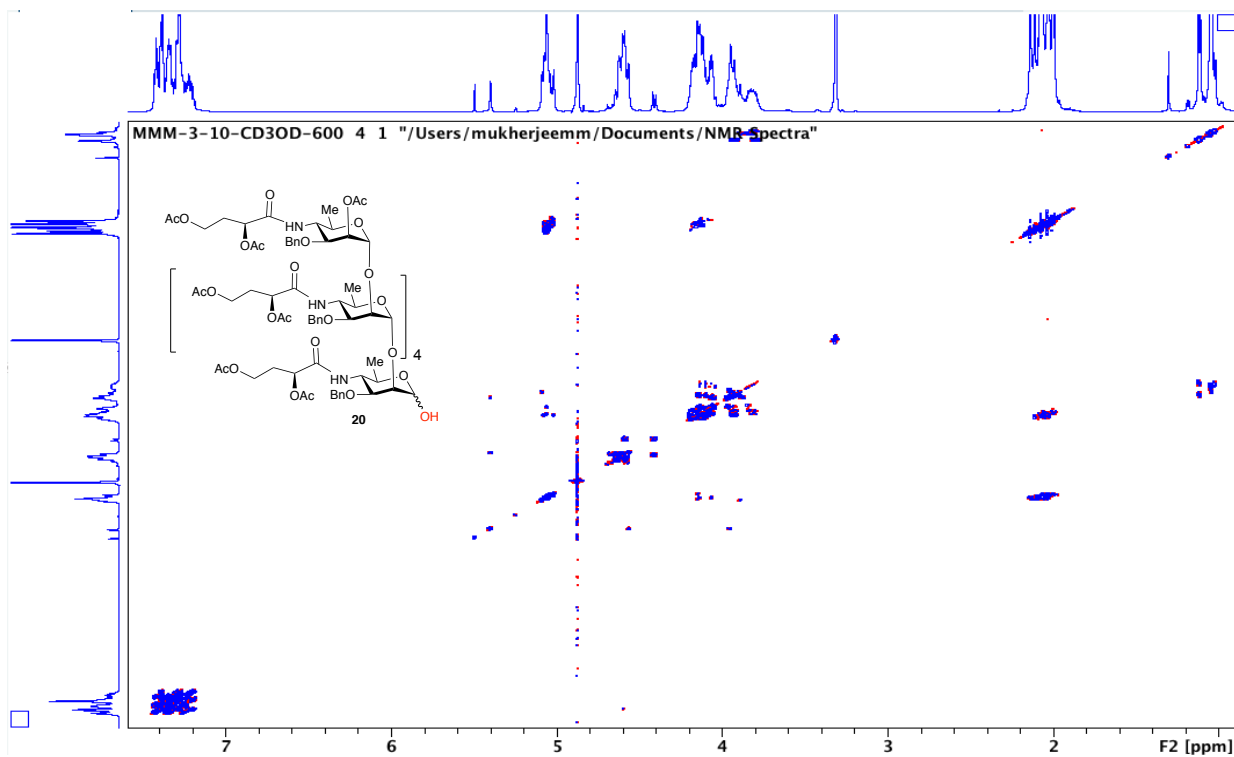

Fig. S73: COSY NMR spectra of compound **20** (CD<sub>3</sub>OD, 600 MHz).

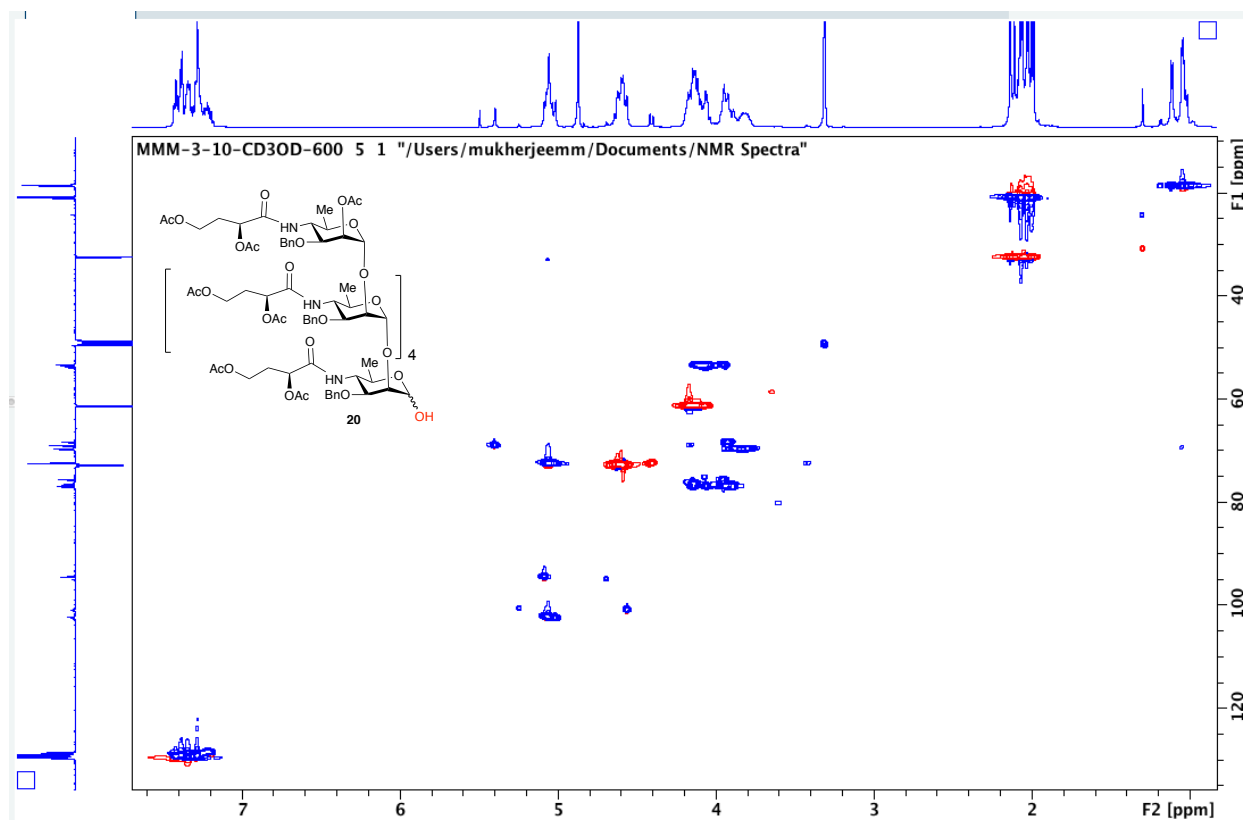

Fig. S74: HSQC NMR spectra of compound **20** (CD<sub>3</sub>OD).



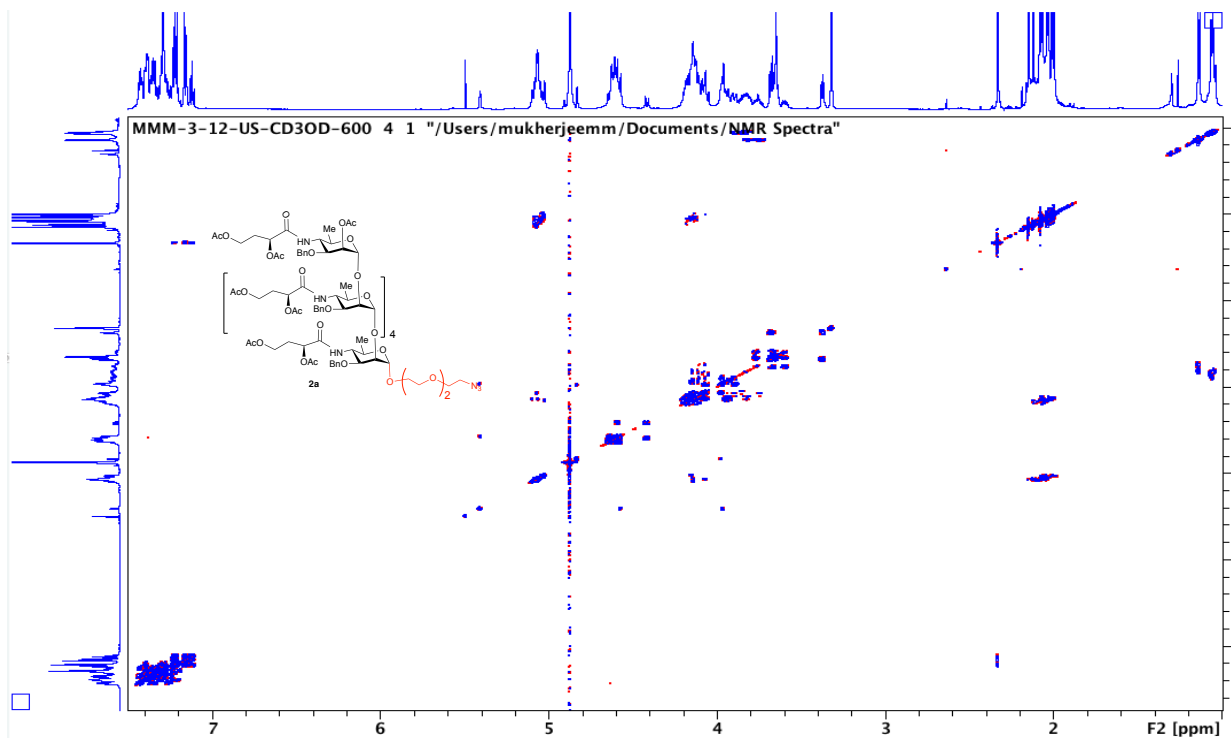

Fig. S77: COSY NMR spectra of compound **2a** (CD<sub>3</sub>OD, 600 MHz).

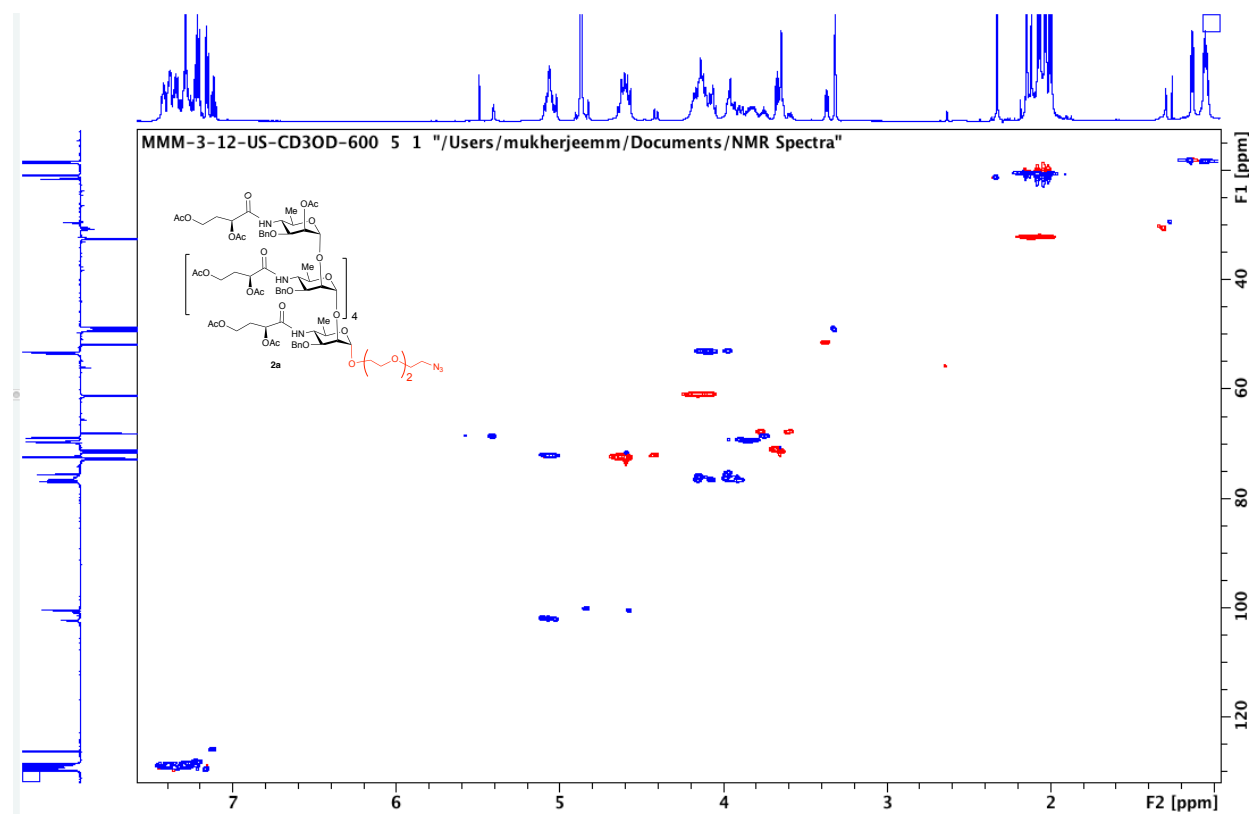

Fig. S78: HSQC NMR spectra of compound **2a** (CD<sub>3</sub>OD).



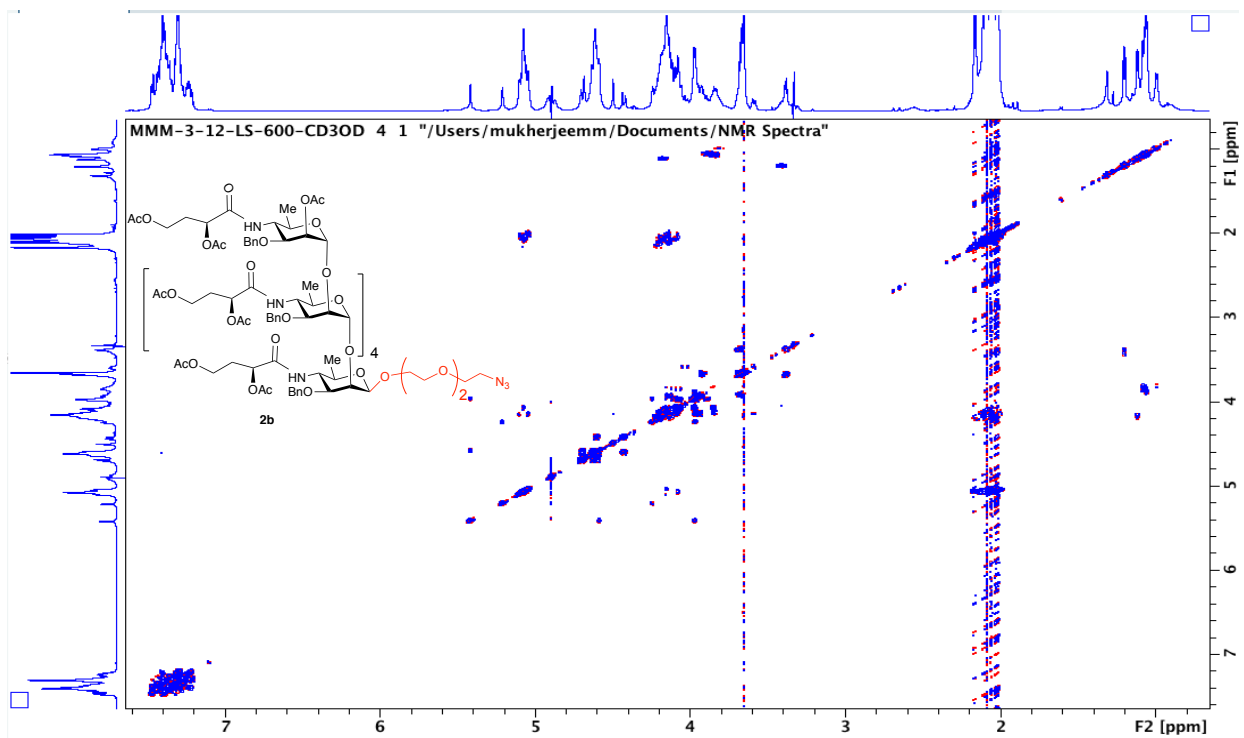

Fig. S81: COSY NMR spectra of compound **2b** (CD<sub>3</sub>OD, 600 MHz).

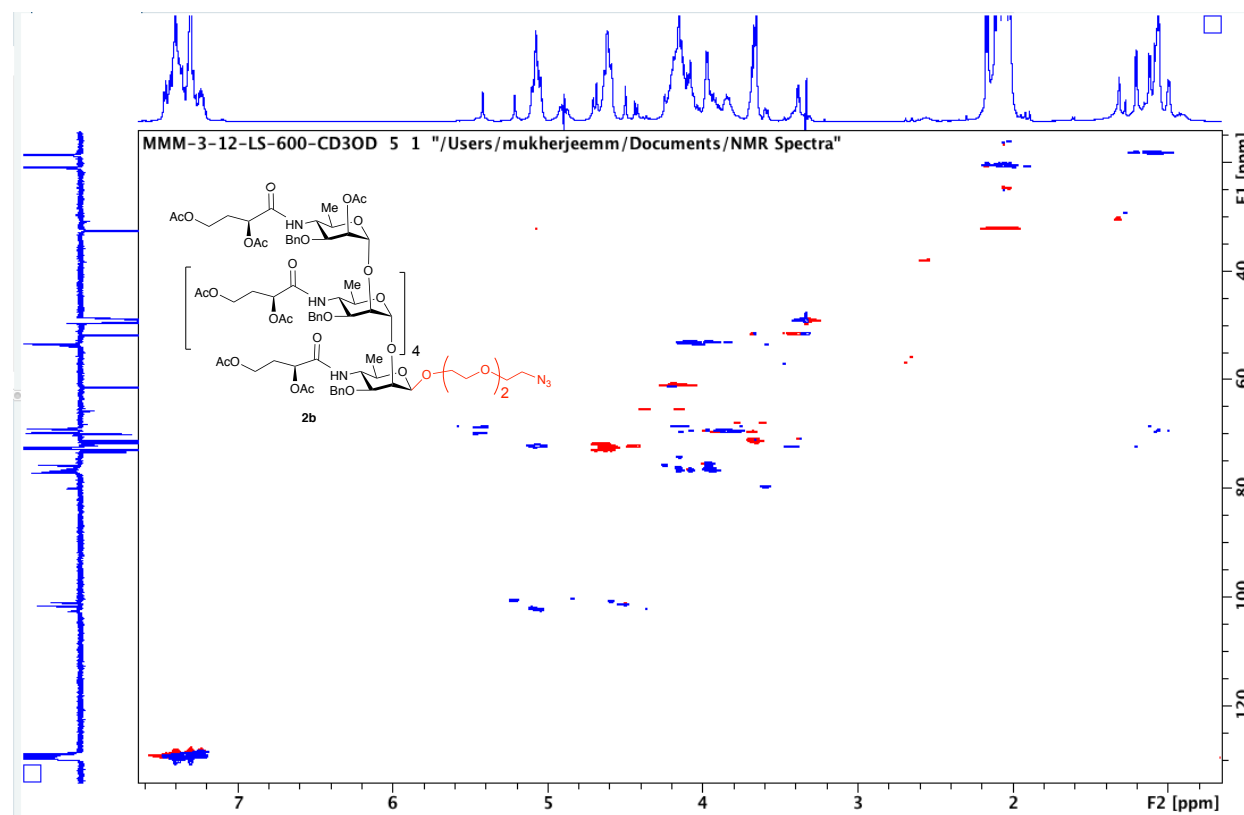

Fig. S82: HSQC NMR spectra of compound **2b** (CD<sub>3</sub>OD).



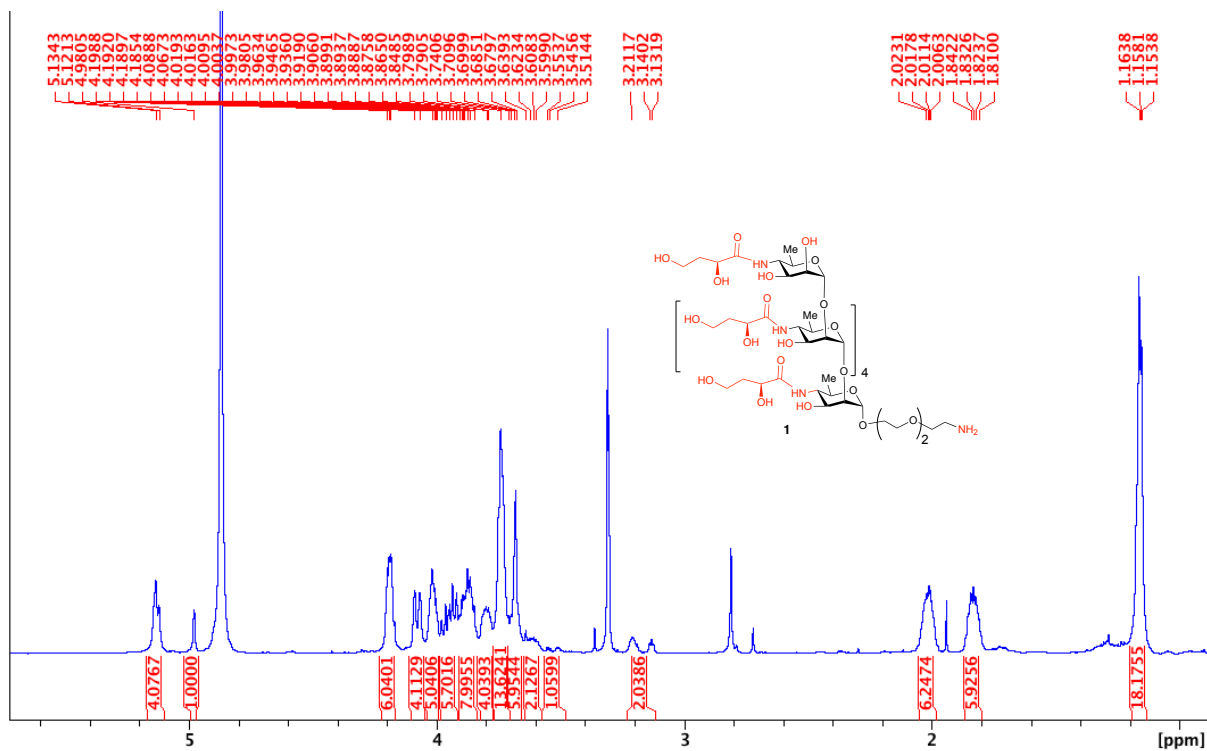

Fig. S83:  $^1\text{H}$  NMR spectra of compound 1 ( $\text{CD}_3\text{OD}$ , 600 MHz).

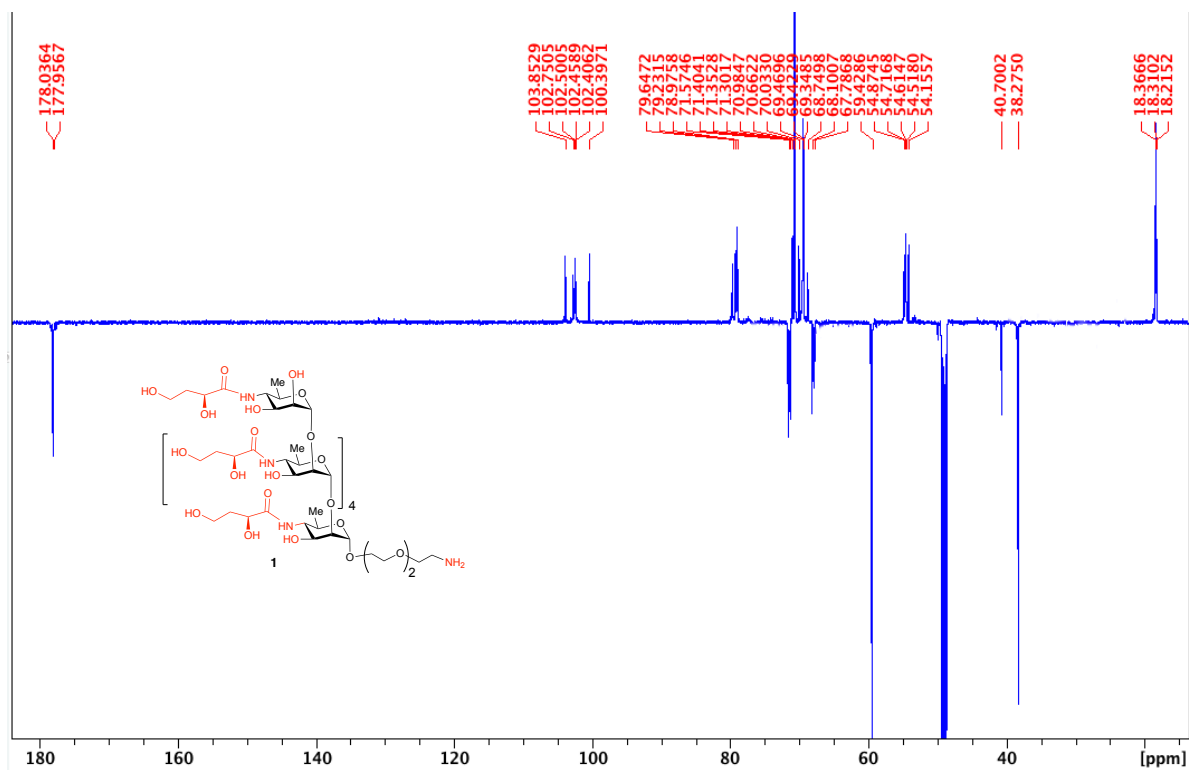

Fig. S84:  $^{13}\text{C}\{^1\text{H}\}$  NMR spectra of compound 1 ( $\text{CD}_3\text{OD}$ , 150 MHz).

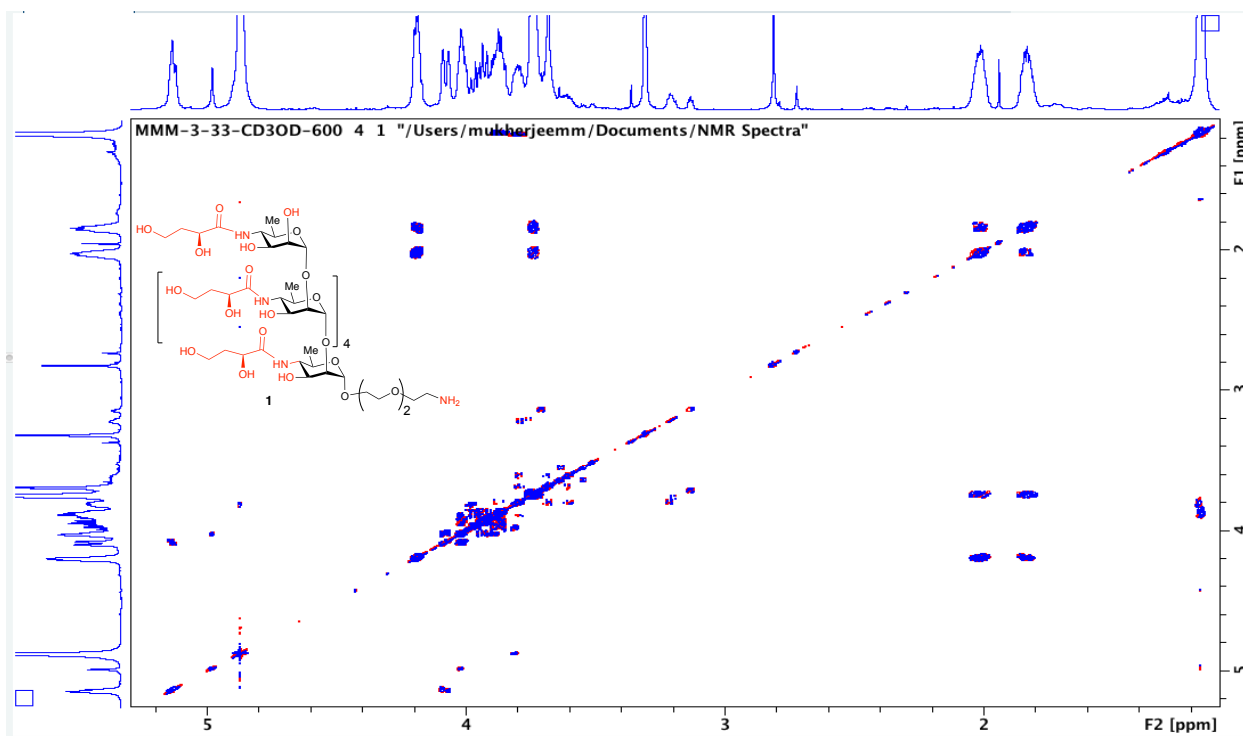

Fig. S85: COSY NMR spectra of compound **1** (CD<sub>3</sub>OD, 600 MHz).

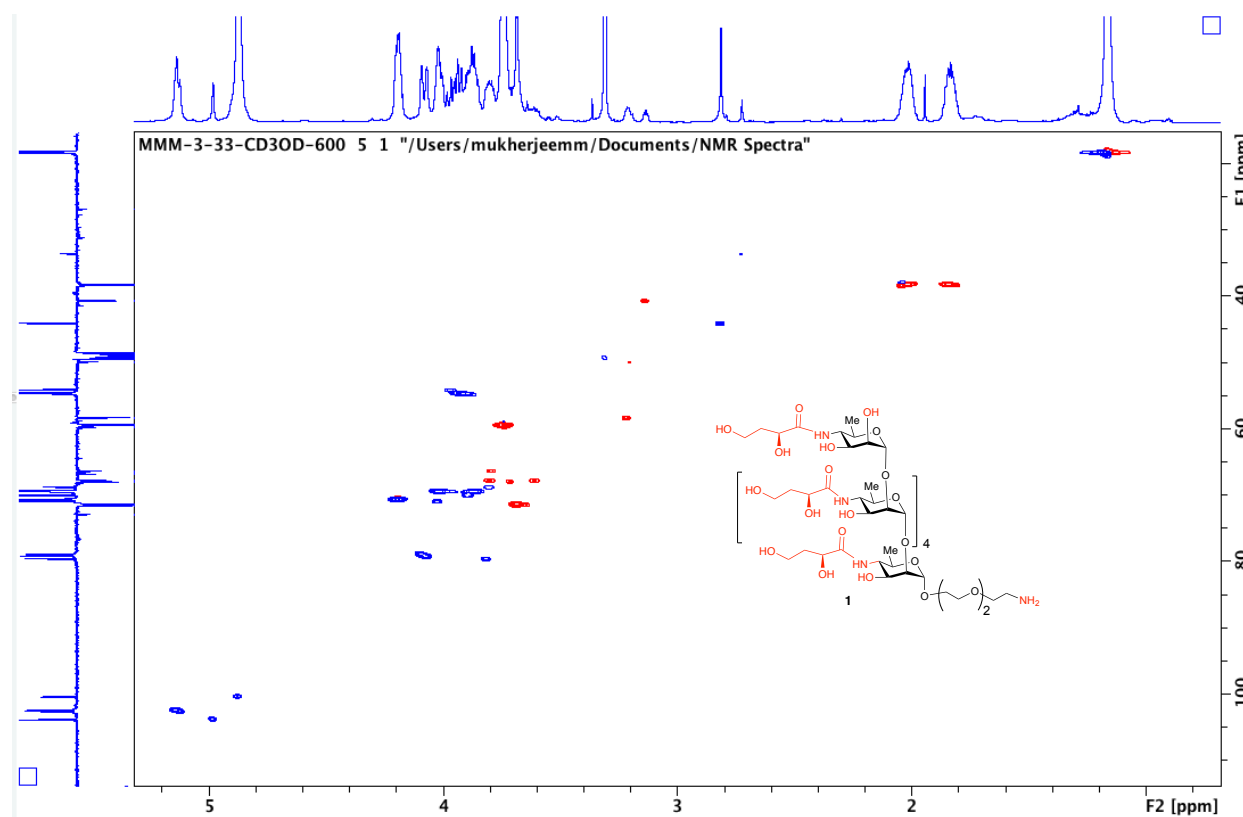

Fig. S86: HSQC NMR spectra of compound **1** (CD<sub>3</sub>OD).

Table for Crystal data and structure refinement for 4.

|                                   |                                                                   |                                      |
|-----------------------------------|-------------------------------------------------------------------|--------------------------------------|
| CCDC deposition number            | <b>1939745</b>                                                    |                                      |
| Empirical formula                 | C <sub>44</sub> H <sub>59</sub> N <sub>9</sub> O <sub>10</sub> Si |                                      |
| Formula weight                    | 902.09                                                            |                                      |
| Temperature                       | 120(2) K                                                          |                                      |
| Wavelength                        | 0.71073 Å                                                         |                                      |
| Crystal system                    | Monoclinic                                                        |                                      |
| Space group                       | P2 <sub>1</sub>                                                   |                                      |
| Unit cell dimensions              | a = 11.530(3) Å<br>b = 16.862(4) Å<br>c = 25.697(6) Å             | α = 90°<br>β = 98.067(4)°<br>γ = 90° |
| Volume                            | 4947(2) Å <sup>3</sup>                                            |                                      |
| Z                                 | 4                                                                 |                                      |
| Density (calculated)              | 1.211 Mg/m <sup>3</sup>                                           |                                      |
| Absorption coefficient            | 0.105 mm <sup>-1</sup>                                            |                                      |
| F(000)                            | 424                                                               |                                      |
| Crystal size                      | 0.40 × 0.30 × 0.30 mm <sup>3</sup>                                |                                      |
| Theta range for data collection   | 1.45 to 47.95°.                                                   |                                      |
| Index ranges                      | -24 ≤ h ≤ 24, -35 ≤ k ≤ 23, -52 ≤ l ≤ 52                          |                                      |
| Reflections collected             | 268004                                                            |                                      |
| Independent reflections           | 72975 (R(int) = 0.0362)                                           |                                      |
| Completeness to theta = 47.95°    | 96.9%                                                             |                                      |
| Absorption correction             | Semi-empirical from equivalents                                   |                                      |
| Max. and min. transmission        | 0.7038 and 0.7470                                                 |                                      |
| Refinement method                 | Full-matrix least-squares on F <sup>2</sup>                       |                                      |
| Data/restraints/parameters        | 56235/1/1167                                                      |                                      |
| Goodness-of-fit on F <sup>2</sup> | 1.038                                                             |                                      |
| Final R indices (I > 2σ(I))       | R1 = 0.0445, wR2 = 0.1034                                         |                                      |
| R indices (all data)              | R1 = 0.0691, wR2 = 0.1171                                         |                                      |
| Absolute structure parameter      | -0.013(14)                                                        |                                      |
| Largest diff. peak and hole       | 1.376 and -0.410 e·Å <sup>-3</sup>                                |                                      |
